# Supplementary material for: Prediction of Drug Indications Based on Chemical Interactions and Chemical Similarities
Source: Hindawi journal article supplement (doi:10.1155/2015/584546), 2015-01-01
Supplement: f1 [file 584546.f1.zip]

**Supplementary Material I.** The codes of 1,733 drug compounds in the dataset  $DS_1$  and their indications.

| ID            | Indications                                 |
|---------------|---------------------------------------------|
| CID0000000106 | Analgesic                                   |
| CID0000000119 | Antihypertensive                            |
| CID0000000158 | Uterine stimulant                           |
| CID0000000159 | Antihypertensive, Antithrombotic            |
| CID0000000160 | Uterine stimulant                           |
| CID0000000175 | Radioactive agent                           |
| CID0000000176 | Pharmaceutic aid                            |
| CID0000000187 | Antiarrhythmic, Vasodilator                 |
| CID0000000191 | Antiarrhythmic                              |
| CID0000000197 | Vasodilator                                 |
| CID0000000206 | Laxative, Diagnostic aid                    |
| CID0000000214 | Vasodilator                                 |
| CID0000000224 | Antiviral, Nutrient                         |
| CID0000000225 | Antineoplastic                              |
| CID0000000229 | Diagnostic aid                              |
| CID0000000231 | Vasodilator, Antipsoriatic, Vasoconstrictor |
| CID0000000237 | Anthelmintic, Antimalarial                  |
| CID0000000242 | Pharmaceutic aid, Antifungal                |
| CID0000000288 | Nutrient, Hypolipidemic                     |

|              |                                                                    |
|--------------|--------------------------------------------------------------------|
| CID000000298 | Antibacterial, Antibiotic                                          |
| CID000000303 | Choleretic                                                         |
| CID000000311 | Pharmaceutic aid                                                   |
| CID000000323 | Antineoplastic, Antiinflammatory, Immunomodulator, Muscle relaxant |
| CID000000338 | Antiinflammatory, Analgesic                                        |
| CID000000342 | Antifungal, Disinfectant                                           |
| CID000000346 | Antibacterial, Antibiotic, Diuretic                                |
| CID000000401 | Antifungal, Antibacterial, Antibiotic, Anticonvulsant              |
| CID000000408 | Antidepressant                                                     |
| CID000000424 | Nutrient                                                           |
| CID000000444 | Antidepressant                                                     |
| CID000000572 | Antimalarial, Antibacterial, Antibiotic                            |
| CID000000586 | Nutrient                                                           |
| CID000000595 | Antipsoriatic                                                      |
| CID000000596 | Antiviral, Antineoplastic                                          |
| CID000000602 | Nutrient                                                           |
| CID000000607 | Pharmaceutic aid                                                   |
| CID000000611 | Pharmaceutic aid                                                   |
| CID000000614 | Nutrient                                                           |
| CID000000617 | Nutrient                                                           |
| CID000000679 | Antiinflammatory                                                   |
| CID000000723 | Pharmaceutic aid                                                   |

|              |                                               |
|--------------|-----------------------------------------------|
| CID000000745 | Antioxidant                                   |
| CID000000750 | Nutrient                                      |
| CID000000791 | Nutrient                                      |
| CID000000816 | Antibacterial, Antibiotic                     |
| CID000000836 | Antiparkinsonian                              |
| CID000000838 | Antiallergic/Antiasthmatic                    |
| CID000000853 | Radioactive agent, Hypolipidemic              |
| CID000000857 | Nutrient                                      |
| CID000000860 | Nutrient                                      |
| CID000000861 | Radioactive agent, Hypolipidemic              |
| CID000000876 | Radioactive agent, Pharmaceutic aid, Nutrient |
| CID000000896 | Antioxidant                                   |
| CID000000932 | Antiulcerative                                |
| CID000000938 | Hypolipidemic                                 |
| CID000000942 | CNS stimulant                                 |
| CID000000943 | Pharmaceutic aid, Disinfectant                |
| CID000000944 | Antineoplastic                                |
| CID000000946 | Vasodilator                                   |
| CID000000965 | Pharmaceutic aid                              |
| CID000000978 | Analgesic                                     |
| CID000000994 | Nutrient                                      |
| CID000000996 | Pharmaceutic aid                              |

|               |                                              |
|---------------|----------------------------------------------|
| CID0000001065 | Antiarrhythmic, Antimalarial, Antidepressant |
| CID0000001117 | Antithrombotic                               |
| CID0000001123 | Antiulcerative                               |
| CID0000001134 | Antiviral, Antineoplastic                    |
| CID0000001148 | Nutrient, Antidepressant                     |
| CID0000001153 | Nutrient, Immunomodulator                    |
| CID0000001182 | Nutrient                                     |
| CID0000001183 | Pharmaceutic aid                             |
| CID0000001203 | Antiviral                                    |
| CID0000001206 | CNS stimulant                                |
| CID0000001207 | Anticonvulsant                               |
| CID0000001224 | Antipsychotic                                |
| CID0000001234 | Antianginal                                  |
| CID0000001236 | Antihypertensive                             |
| CID0000001238 | Antipsychotic                                |
| CID0000001253 | Cognition enhancer                           |
| CID0000001257 | Antihypertensive                             |
| CID0000001288 | Antineoplastic                               |
| CID0000001292 | Disinfectant                                 |
| CID0000001302 | Antiinflammatory, Analgesic                  |
| CID0000001392 | Antineoplastic                               |
| CID0000001436 | Diagnostic aid                               |

|              |                                               |
|--------------|-----------------------------------------------|
| CID000001613 | Antidiabetic                                  |
| CID000001614 | Psychodysleptic                               |
| CID000001615 | Antidepressant, CNS stimulant, Anxiolytic     |
| CID000001646 | Anti-Alzheimer's Disease                      |
| CID000001662 | Hypolipidemic                                 |
| CID000001683 | Antiemetic                                    |
| CID000001687 | Antihistamine                                 |
| CID000001691 | Antineoplastic                                |
| CID000001744 | Antineoplastic                                |
| CID000001775 | Anticonvulsant                                |
| CID000001814 | Antiviral                                     |
| CID000001821 | Antineoplastic                                |
| CID000001882 | Antiallergic/Antiasthmatic                    |
| CID000001892 | Vasodilator, Diuretic, Cardiotonic            |
| CID000001923 | Disinfectant                                  |
| CID000001972 | Antifungal                                    |
| CID000001978 | Antihypertensive, Antiarrhythmic, Antianginal |
| CID000001981 | Antiinflammatory                              |
| CID000001983 | Analgesic                                     |
| CID000001986 | Antiglaucoma                                  |
| CID000002008 | Antineoplastic                                |
| CID000002017 | Disinfectant                                  |

|              |                                             |
|--------------|---------------------------------------------|
| CID000002019 | Antineoplastic                              |
| CID000002081 | Antidepressant                              |
| CID000002083 | Muscle relaxant, Antiallergic/Antiasthmatic |
| CID000002092 | Antihypertensive                            |
| CID000002118 | Anxiolytic                                  |
| CID000002123 | Antineoplastic                              |
| CID000002130 | Antiviral                                   |
| CID000002136 | Antiinflammatory                            |
| CID000002137 | CNS stimulant                               |
| CID000002145 | Antineoplastic                              |
| CID000002153 | Muscle relaxant, Diuretic, Cardiotonic      |
| CID000002157 | Antiarrhythmic, Antidepressant              |
| CID000002159 | Antipsychotic                               |
| CID000002160 | Antidepressant                              |
| CID000002162 | Antihypertensive, Vasodilator, Antianginal  |
| CID000002169 | Antihypertensive                            |
| CID000002170 | Antidepressant                              |
| CID000002171 | Antibiotic                                  |
| CID000002174 | Antibacterial, Antibiotic                   |
| CID000002177 | Antiviral                                   |
| CID000002178 | Antibacterial, Antibiotic                   |
| CID000002179 | Antineoplastic                              |

|              |                                                            |
|--------------|------------------------------------------------------------|
| CID000002187 | Antineoplastic                                             |
| CID000002196 | Cognition enhancer                                         |
| CID000002197 | Antithrombotic                                             |
| CID000002199 | Antibiotic                                                 |
| CID000002200 | Antihistamine                                              |
| CID000002202 | Antipsoriatic, Antifungal                                  |
| CID000002210 | Antiviral, Antineoplastic                                  |
| CID000002216 | Antiglaucoma                                               |
| CID000002230 | Anthelmintic                                               |
| CID000002235 | Antiviral, Antibiotic                                      |
| CID000002239 | Antihypertensive                                           |
| CID000002240 | Antimalarial                                               |
| CID000002244 | Antiinflammatory, Analgesic                                |
| CID000002247 | Antihistamine, Antiallergic/Antiasthmatic                  |
| CID000002249 | Antihypertensive, Antiarrhythmic, Antianginal, Cardiotonic |
| CID000002250 | Hypocholesterolemic                                        |
| CID000002267 | Antihistamine, Antiallergic/Antiasthmatic                  |
| CID000002274 | Antibiotic                                                 |
| CID000002277 | Antihypertensive                                           |
| CID000002284 | Muscle relaxant                                            |
| CID000002299 | Antineoplastic, Antiinflammatory                           |
| CID000002311 | Antihypertensive                                           |

|              |                                                    |
|--------------|----------------------------------------------------|
| CID000002333 | Uricosuric                                         |
| CID000002335 | Pharmaceutic aid                                   |
| CID000002346 | Antibiotic                                         |
| CID000002349 | Antibacterial, Antibiotic                          |
| CID000002351 | Vasodilator, Antianginal                           |
| CID000002352 | Antithrombotic                                     |
| CID000002353 | Antimalarial, Antibacterial, Antibiotic, Analgesic |
| CID000002355 | Antipsoriatic                                      |
| CID000002356 | Antineoplastic                                     |
| CID000002366 | Vasodilator                                        |
| CID000002369 | Antihypertensive, Antianginal                      |
| CID000002375 | Antineoplastic                                     |
| CID000002377 | Cognition enhancer                                 |
| CID000002378 | Antifungal                                         |
| CID000002391 | Laxative                                           |
| CID000002405 | Antihypertensive                                   |
| CID000002444 | Antihistamine                                      |
| CID000002448 | Antipsychotic                                      |
| CID000002449 | Antiallergic/Antiasthmatic                         |
| CID000002451 | Anxiolytic, Sedative/Hypnotic                      |
| CID000002453 | Disinfectant                                       |
| CID000002462 | Antiinflammatory                                   |



|              |                                                            |
|--------------|------------------------------------------------------------|
| CID000002466 | Antiinflammatory, Analgesic                                |
| CID000002471 | Diuretic                                                   |
| CID000002474 | Anesthetic                                                 |
| CID000002476 | Analgesic                                                  |
| CID000002477 | Anxiolytic                                                 |
| CID000002487 | Analgesic                                                  |
| CID000002519 | Diuretic, CNS stimulant                                    |
| CID000002520 | Antihypertensive, Antiarrhythmic, Vasodilator, Antianginal |
| CID000002522 | Antipsoriatic                                              |
| CID000002538 | Antineoplastic                                             |
| CID000002543 | Anxiolytic                                                 |
| CID000002548 | Diagnostic aid, Analgesic                                  |
| CID000002550 | Antihypertensive                                           |
| CID000002552 | Antithrombotic                                             |
| CID000002554 | Analgesic, Anticonvulsant                                  |
| CID000002564 | Antihistamine                                              |
| CID000002578 | Antineoplastic                                             |
| CID000002580 | Antidepressant                                             |
| CID000002581 | Antiinflammatory                                           |
| CID000002583 | Antihypertensive, Antianginal                              |
| CID000002585 | Antihypertensive, Vasodilator, Antianginal                 |
| CID000002609 | Antibacterial, Antibiotic                                  |

|              |                                            |
|--------------|--------------------------------------------|
| CID000002610 | Antibacterial, Antibiotic                  |
| CID000002614 | Antibacterial, Antibiotic                  |
| CID000002622 | Antibacterial, Antibiotic                  |
| CID000002626 | Antibacterial, Antibiotic                  |
| CID000002632 | Antibacterial, Antibiotic                  |
| CID000002657 | Antibacterial, Antibiotic                  |
| CID000002659 | Antibacterial, Antibiotic                  |
| CID000002662 | Antiinflammatory                           |
| CID000002666 | Antibacterial, Antibiotic                  |
| CID000002675 | Antibacterial, Antibiotic                  |
| CID000002678 | Antihistamine, Antiallergic/Antiasthmatic  |
| CID000002680 | Antiulcerative                             |
| CID000002681 | Disinfectant                               |
| CID000002683 | Pharmaceutic aid                           |
| CID000002684 | Anti-Alzheimer's Disease                   |
| CID000002692 | Antipsychotic                              |
| CID000002708 | Antineoplastic                             |
| CID000002710 | Antihistamine                              |
| CID000002719 | Antimalarial, Antiinflammatory, Antiamebic |
| CID000002722 | Antipsoriatic, Disinfectant                |
| CID000002725 | Antihistamine                              |
| CID000002726 | Antipsychotic, Antiemetic                  |

|              |                                |
|--------------|--------------------------------|
| CID000002727 | Antidiabetic                   |
| CID000002729 | Antipsychotic                  |
| CID000002732 | Antihypertensive, Diuretic     |
| CID000002733 | Muscle relaxant                |
| CID000002735 | Antiinflammatory               |
| CID000002746 | Antineoplastic                 |
| CID000002747 | Antiarrhythmic, Antidepressant |
| CID000002748 | Antibacterial, Antibiotic      |
| CID000002749 | Antifungal                     |
| CID000002750 | Antidiabetic                   |
| CID000002754 | Antithrombotic                 |
| CID000002757 | Antimalarial                   |
| CID000002758 | Pharmaceutic aid               |
| CID000002761 | Vasodilator, Antihistamine     |
| CID000002762 | Antibacterial, Antibiotic      |
| CID000002764 | Antibacterial, Antibiotic      |
| CID000002771 | Antidepressant                 |
| CID000002780 | Antiemetic, Spasmolytic        |
| CID000002781 | Antihistamine                  |
| CID000002782 | Antihistamine                  |
| CID000002784 | Spasmolytic                    |
| CID000002788 | Antiamoebic                    |

|              |                                       |
|--------------|---------------------------------------|
| CID000002791 | Vasoconstrictor, Antiinflammatory     |
| CID000002794 | Antifungal, Antibacterial, Antibiotic |
| CID000002796 | Hypolipidemic                         |
| CID000002797 | Hypolipidemic                         |
| CID000002798 | Antiarrhythmic, Antidepressant        |
| CID000002801 | Antidepressant                        |
| CID000002802 | Anticonvulsant                        |
| CID000002803 | Antihypertensive                      |
| CID000002806 | Antithrombotic, Antianginal           |
| CID000002814 | Antibacterial, Antibiotic             |
| CID000002817 | Antibacterial, Antibiotic             |
| CID000002825 | Anesthetic                            |
| CID000002826 | Anesthetic                            |
| CID000002828 | Analgesic                             |
| CID000002832 | Antineoplastic                        |
| CID000002854 | Hypolipidemic                         |
| CID000002860 | Antamebic                             |
| CID000002871 | Anthelmintic                          |
| CID000002889 | Choleretic                            |
| CID000002900 | Antipsoriatic                         |
| CID000002901 | Antineoplastic                        |
| CID000002905 | Spasmolytic                           |

|              |                             |
|--------------|-----------------------------|
| CID000002909 | Immunomodulator             |
| CID000002910 | Antihypertensive, Diuretic  |
| CID000002913 | Antihistamine               |
| CID000002919 | Antineoplastic, Antibiotic  |
| CID000002950 | Laxative                    |
| CID000002955 | Antibacterial, Antibiotic   |
| CID000002958 | Antineoplastic              |
| CID000002966 | Antihypertensive            |
| CID000002968 | Muscle relaxant             |
| CID000002977 | Antiemetic                  |
| CID000002978 | Antiemetic, Antianorexic    |
| CID000002993 | Disinfectant                |
| CID000002995 | Antidepressant              |
| CID000002997 | Anxiolytic                  |
| CID000002998 | Vasodilator                 |
| CID000003007 | CNS stimulant, Antianorexic |
| CID000003009 | Antineoplastic              |
| CID000003016 | Anxiolytic                  |
| CID000003025 | Anesthetic                  |
| CID000003033 | Antiinflammatory            |
| CID000003037 | Anthelmintic                |
| CID000003039 | Anthelmintic                |

|              |                                            |
|--------------|--------------------------------------------|
| CID000003041 | Antibacterial, Antibiotic                  |
| CID000003059 | Antiinflammatory, Analgesic                |
| CID000003061 | Cardiotonic                                |
| CID000003062 | Cardiotonic                                |
| CID000003065 | Cognition enhancer                         |
| CID000003066 | Analgesic                                  |
| CID000003076 | Vasodilator                                |
| CID000003100 | Antiemetic, Antihistamine                  |
| CID000003103 | Antiemetic, Antihistamine                  |
| CID000003108 | Vasodilator                                |
| CID000003114 | Antiarrhythmic, Antidepressant             |
| CID000003115 | Antibacterial, Antibiotic                  |
| CID000003121 | Anticonvulsant                             |
| CID000003126 | Antineoplastic, Antipsoriatic              |
| CID000003143 | Antineoplastic                             |
| CID000003144 | Antiatherosclerotic                        |
| CID000003148 | Analgesic, Antiemetic                      |
| CID000003150 | Anthelmintic                               |
| CID000003151 | Antiemetic                                 |
| CID000003152 | Antihypertensive, Anti-Alzheimer's Disease |
| CID000003154 | Antiglaucoma                               |
| CID000003155 | Antidepressant                             |

|              |                                           |
|--------------|-------------------------------------------|
| CID000003157 | Antihypertensive                          |
| CID000003158 | Antidepressant                            |
| CID000003159 | Antineoplastic                            |
| CID000003168 | Antipsychotic                             |
| CID000003182 | Antiallergic/Antiasthmatic                |
| CID000003183 | Antiviral                                 |
| CID000003191 | Antihistamine                             |
| CID000003194 | Antiinflammatory                          |
| CID000003198 | Antifungal                                |
| CID000003202 | Diagnostic aid                            |
| CID000003209 | Hypolipidemic                             |
| CID000003213 | Antineoplastic                            |
| CID000003219 | Antihistamine, Antiallergic/Antiasthmatic |
| CID000003220 | Laxative                                  |
| CID000003222 | Antihypertensive                          |
| CID000003229 | Antibacterial, Antibiotic                 |
| CID000003230 | Antiinflammatory                          |
| CID000003231 | Antiulcerative, Antisecretory (gastric)   |
| CID000003235 | Antidiabetic                              |
| CID000003240 | Antibacterial, Antibiotic                 |
| CID000003241 | Antihistamine, Antiallergic/Antiasthmatic |
| CID000003250 | Uterine stimulant                         |

|              |                                           |
|--------------|-------------------------------------------|
| CID000003251 | Analgesic                                 |
| CID000003255 | Antibacterial, Antibiotic                 |
| CID000003268 | Antineoplastic                            |
| CID000003277 | Antipsychotic                             |
| CID000003278 | Diuretic                                  |
| CID000003290 | Antiparkinsonian, Spasmolytic             |
| CID000003291 | Anticonvulsant                            |
| CID000003295 | Diuretic                                  |
| CID000003308 | Antiinflammatory                          |
| CID000003310 | Antineoplastic                            |
| CID000003314 | Analgesic                                 |
| CID000003321 | Antifungal                                |
| CID000003333 | Antihypertensive, Vasodilator             |
| CID000003335 | Antiinflammatory                          |
| CID000003336 | Vasodilator                               |
| CID000003337 | Antianorexic, Antiobesity                 |
| CID000003339 | Hypolipidemic, Hypocholesterolemic        |
| CID000003341 | Antihypertensive, Vasodilator             |
| CID000003342 | Antiinflammatory, Analgesic               |
| CID000003343 | Antiallergic/Antiasthmatic                |
| CID000003345 | Analgesic                                 |
| CID000003348 | Antihistamine, Antiallergic/Antiasthmatic |



|              |                                                       |
|--------------|-------------------------------------------------------|
| CID000003349 | Antidiabetic                                          |
| CID000003350 | Antineoplastic                                        |
| CID000003356 | Antiarrhythmic                                        |
| CID000003363 | Antiviral, Antineoplastic                             |
| CID000003365 | Antifungal                                            |
| CID000003367 | Antineoplastic                                        |
| CID000003371 | Antiinflammatory                                      |
| CID000003372 | Antipsychotic                                         |
| CID000003378 | Vasodilator, Anticonvulsant                           |
| CID000003380 | Anxiolytic, Sedative/Hypnotic                         |
| CID000003385 | Antineoplastic                                        |
| CID000003386 | Antidepressant                                        |
| CID000003394 | Antiinflammatory, Analgesic, Anti-Alzheimer's Disease |
| CID000003396 | Antipsychotic                                         |
| CID000003399 | Antiinflammatory                                      |
| CID000003404 | Antidepressant                                        |
| CID000003408 | Antineoplastic                                        |
| CID000003410 | Antiallergic/Antiasthmatic                            |
| CID000003414 | Antiviral                                             |
| CID000003415 | Antiviral                                             |
| CID000003417 | Antibacterial, Antibiotic                             |
| CID000003418 | Antiinflammatory, Analgesic                           |

|              |                                                                         |
|--------------|-------------------------------------------------------------------------|
| CID000003425 | Antineoplastic                                                          |
| CID000003430 | Antibiotic, Antiamebic                                                  |
| CID000003433 | Antiallergic/Antiasthmatic                                              |
| CID000003440 | Diuretic                                                                |
| CID000003442 | Antihypertensive                                                        |
| CID000003443 | Antibacterial, Antibiotic                                               |
| CID000003446 | Anticonvulsant                                                          |
| CID000003448 | Analgesic                                                               |
| CID000003463 | Hypolipidemic                                                           |
| CID000003469 | Antiinflammatory, Analgesic                                             |
| CID000003477 | Antibiotic                                                              |
| CID000003478 | Antidiabetic                                                            |
| CID000003488 | Antidiabetic                                                            |
| CID000003495 | Antiviral, Antiinflammatory, Antiulcerative, Antiallergic/Antiasthmatic |
| CID000003503 | Antimalarial, Antioxidant                                               |
| CID000003510 | Antiemetic                                                              |
| CID000003512 | Antifungal                                                              |
| CID000003559 | Antipsychotic                                                           |
| CID000003561 | Antibacterial, Antibiotic                                               |
| CID000003562 | Anesthetic                                                              |
| CID000003593 | Antioxidant                                                             |
| CID000003594 | Antioxidant                                                             |

|              |                                              |
|--------------|----------------------------------------------|
| CID000003599 | Antineoplastic                               |
| CID000003604 | Antihypertensive                             |
| CID000003606 | Vasodilator, Antineoplastic                  |
| CID000003610 | Anthelmintic, Disinfectant                   |
| CID000003623 | Spasmolytic                                  |
| CID000003624 | Antineoplastic                               |
| CID000003636 | Spasmolytic                                  |
| CID000003637 | Antihypertensive                             |
| CID000003639 | Diuretic                                     |
| CID000003647 | Antihypertensive, Diuretic                   |
| CID000003648 | Analgesic                                    |
| CID000003649 | Antiarrhythmic, Antimalarial                 |
| CID000003655 | Cognition enhancer, Anti-Alzheimer's Disease |
| CID000003657 | Antineoplastic                               |
| CID000003661 | Spasmolytic                                  |
| CID000003671 | Vasodilator, Antiallergic/Antiasthmatic      |
| CID000003672 | Antiinflammatory, Analgesic                  |
| CID000003675 | Antidepressant                               |
| CID000003676 | Anesthetic                                   |
| CID000003677 | Vasoconstrictor                              |
| CID000003678 | Spasmolytic                                  |
| CID000003685 | Antineoplastic                               |

|              |                                            |
|--------------|--------------------------------------------|
| CID000003687 | Antiviral                                  |
| CID000003689 | Vasodilator                                |
| CID000003693 | Antihypertensive                           |
| CID000003696 | Antidepressant                             |
| CID000003698 | Cardiotonic                                |
| CID000003702 | Antihypertensive, Diuretic                 |
| CID000003703 | Antidepressant                             |
| CID000003706 | Antiviral                                  |
| CID000003715 | Antiinflammatory                           |
| CID000003718 | Antiinflammatory, Analgesic                |
| CID000003728 | Antiamoebic                                |
| CID000003746 | Antiallergic/Antiasthmatic                 |
| CID000003748 | Antidepressant                             |
| CID000003750 | Antineoplastic                             |
| CID000003760 | Antifungal, Antibacterial, Antibiotic      |
| CID000003767 | Antifungal, Antibacterial, Antibiotic      |
| CID000003775 | Spasmolytic                                |
| CID000003777 | Antihypertensive, Antifungal, Antiglaucoma |
| CID000003779 | Antiallergic/Antiasthmatic                 |
| CID000003783 | Vasodilator                                |
| CID000003793 | Antifungal                                 |
| CID000003816 | Anthelmintic                               |

|              |                                   |
|--------------|-----------------------------------|
| CID000003817 | Antiviral                         |
| CID000003818 | Cardiotonic                       |
| CID000003821 | Analgesic, Anesthetic             |
| CID000003822 | Antihypertensive                  |
| CID000003823 | Antifungal                        |
| CID000003825 | Antiinflammatory, Analgesic       |
| CID000003826 | Antiinflammatory, Analgesic       |
| CID000003827 | Antiallergic/Antiasthmatic        |
| CID000003869 | Antihypertensive, Antianginal     |
| CID000003878 | Anticonvulsant                    |
| CID000003883 | Antiulcerative                    |
| CID000003890 | Antiglaucoma                      |
| CID000003899 | Antiinflammatory, Immunomodulator |
| CID000003902 | Antineoplastic                    |
| CID000003912 | Narcotic antagonist               |
| CID000003913 | Anthelmintic                      |
| CID000003915 | Antihistamine                     |
| CID000003916 | Analgesic                         |
| CID000003917 | Vasoconstrictor                   |
| CID000003918 | Analgesic                         |
| CID000003926 | Vasodilator                       |
| CID000003928 | Antibacterial, Antibiotic         |

|              |                                    |
|--------------|------------------------------------|
| CID000003929 | Antibacterial, Antibiotic          |
| CID000003937 | Antihypertensive                   |
| CID000003947 | Antidepressant                     |
| CID000003957 | Antihistamine                      |
| CID000003958 | Anxiolytic                         |
| CID000003960 | Spasmolytic                        |
| CID000003962 | Hypolipidemic, Hypocholesterolemic |
| CID000003964 | Anxiolytic                         |
| CID000003965 | Antiinflammatory, Analgesic        |
| CID000003966 | Uterine stimulant                  |
| CID000003981 | Psychodysleptic                    |
| CID000003998 | Antibacterial, Antibiotic          |
| CID000004008 | Antihypertensive                   |
| CID000004011 | Antidepressant                     |
| CID000004020 | CNS stimulant, Antianorexic        |
| CID000004032 | Antihypertensive                   |
| CID000004034 | Antiemetic                         |
| CID000004037 | Antiinflammatory                   |
| CID000004041 | Anxiolytic                         |
| CID000004044 | Antiinflammatory, Analgesic        |
| CID000004046 | Antimalarial                       |
| CID000004053 | Antineoplastic                     |

|              |                                            |
|--------------|--------------------------------------------|
| CID000004054 | Antiparkinsonian, Anti-Alzheimer's Disease |
| CID000004056 | Antithrombotic                             |
| CID000004057 | Spasmolytic                                |
| CID000004058 | Analgesic                                  |
| CID000004075 | Antiinflammatory                           |
| CID000004076 | Psychodysleptic                            |
| CID000004078 | Antipsychotic                              |
| CID000004084 | Antibiotic                                 |
| CID000004090 | Analgesic                                  |
| CID000004095 | Analgesic                                  |
| CID000004098 | Antihistamine                              |
| CID000004106 | Antipsychotic                              |
| CID000004112 | Antineoplastic                             |
| CID000004120 | Spasmolytic                                |
| CID000004135 | Disinfectant                               |
| CID000004138 | Antihypertensive                           |
| CID000004140 | Uterine stimulant                          |
| CID000004157 | Spasmolytic                                |
| CID000004158 | CNS stimulant                              |
| CID000004163 | Vasoconstrictor, Analgesic                 |
| CID000004167 | Muscle relaxant                            |
| CID000004170 | Antihypertensive, Diuretic                 |

|              |                                               |
|--------------|-----------------------------------------------|
| CID000004171 | Antihypertensive, Antiarrhythmic, Antianginal |
| CID000004174 | Diagnostic aid                                |
| CID000004178 | Antiarrhythmic, Antidepressant                |
| CID000004184 | Antidepressant, Anxiolytic, Antihistamine     |
| CID000004189 | Antifungal                                    |
| CID000004192 | Anesthetic                                    |
| CID000004197 | Cardiotonic                                   |
| CID000004199 | Antidepressant                                |
| CID000004205 | Antidepressant                                |
| CID000004212 | Antineoplastic                                |
| CID000004235 | Antidepressant                                |
| CID000004236 | CNS stimulant                                 |
| CID000004240 | Antiinflammatory                              |
| CID000004248 | Antiallergic/Antiasthmatic                    |
| CID000004249 | Anxiolytic                                    |
| CID000004253 | Analgesic                                     |
| CID000004261 | Antineoplastic                                |
| CID000004264 | Antibacterial, Antibiotic                     |
| CID000004266 | Psychodysleptic                               |
| CID000004272 | Antineoplastic                                |
| CID000004312 | Antineoplastic                                |
| CID000004342 | Antiarrhythmic, Antidepressant                |



|              |                                               |
|--------------|-----------------------------------------------|
| CID000004380 | Antidepressant                                |
| CID000004409 | Antiinflammatory                              |
| CID000004411 | Antihypertensive, Antiarrhythmic, Antianginal |
| CID000004416 | Antineoplastic                                |
| CID000004417 | Vasodilator                                   |
| CID000004418 | Antihypertensive                              |
| CID000004419 | Analgesic, Narcotic antagonist                |
| CID000004421 | Antibacterial, Antibiotic                     |
| CID000004422 | Narcotic antagonist                           |
| CID000004423 | Narcotic antagonist                           |
| CID000004424 | Narcotic antagonist                           |
| CID000004425 | Narcotic antagonist                           |
| CID000004428 | Narcotic antagonist                           |
| CID000004436 | Vasoconstrictor                               |
| CID000004440 | Analgesic                                     |
| CID000004443 | Antidiabetic                                  |
| CID000004449 | Antidepressant                                |
| CID000004451 | Antiviral                                     |
| CID000004452 | Antipsychotic                                 |
| CID000004454 | Antibiotic                                    |
| CID000004477 | Anthelmintic                                  |
| CID000004485 | Vasodilator                                   |

|              |                                               |
|--------------|-----------------------------------------------|
| CID000004488 | Antiinflammatory                              |
| CID000004495 | Antiinflammatory                              |
| CID000004497 | Vasodilator                                   |
| CID000004499 | Vasodilator, Antianginal                      |
| CID000004500 | Antidepressant                                |
| CID000004506 | Anticonvulsant, Anxiolytic, Sedative/Hypnotic |
| CID000004507 | Antihypertensive                              |
| CID000004509 | Antibacterial, Antibiotic                     |
| CID000004528 | Antidepressant                                |
| CID000004534 | Antineoplastic                                |
| CID000004539 | Antibacterial, Antibiotic                     |
| CID000004541 | Antidepressant                                |
| CID000004543 | Antidepressant                                |
| CID000004547 | Antidiabetic                                  |
| CID000004583 | Antibacterial, Antibiotic                     |
| CID000004595 | Antipsychotic, Anxiolytic, Antiemetic         |
| CID000004599 | Hypolipidemic, Antiobesity                    |
| CID000004601 | Muscle relaxant, Antihistamine                |
| CID000004603 | Antiviral                                     |
| CID000004605 | Cardiotonic                                   |
| CID000004608 | Antibacterial, Antibiotic                     |
| CID000004614 | Antiinflammatory                              |

|              |                                       |
|--------------|---------------------------------------|
| CID000004615 | Antiallergic/Antiasthmatic            |
| CID000004616 | Anxiolytic                            |
| CID000004621 | Anesthetic                            |
| CID000004631 | Vasodilator                           |
| CID000004634 | Spasmolytic                           |
| CID000004635 | Analgesic                             |
| CID000004639 | Analgesic                             |
| CID000004646 | Antithrombotic, Vasodilator           |
| CID000004649 | Antifungal, Antibacterial, Antibiotic |
| CID000004666 | Antineoplastic                        |
| CID000004671 | Antiinflammatory                      |
| CID000004680 | Muscle relaxant                       |
| CID000004688 | Antihypertensive                      |
| CID000004724 | Antihypertensive                      |
| CID000004734 | Diagnostic aid                        |
| CID000004736 | Analgesic                             |
| CID000004737 | Sedative/Hypnotic                     |
| CID000004740 | Vasodilator                           |
| CID000004746 | Vasodilator                           |
| CID000004747 | Antipsychotic                         |
| CID000004748 | Antipsychotic                         |
| CID000004749 | Cardiotonic                           |

|               |                                   |
|---------------|-----------------------------------|
| CID0000004760 | Antithrombotic                    |
| CID0000004763 | Anticonvulsant, Sedative/Hypnotic |
| CID0000004764 | Laxative                          |
| CID0000004768 | Antihypertensive                  |
| CID0000004770 | Muscle relaxant, Anxiolytic       |
| CID0000004771 | Antianorexic                      |
| CID0000004781 | Antiinflammatory, Analgesic       |
| CID0000004786 | Antianorexic                      |
| CID0000004802 | Antiulcerative                    |
| CID0000004810 | Antihypertensive                  |
| CID0000004815 | CNS stimulant                     |
| CID0000004819 | Antiglaucoma                      |
| CID0000004822 | Anxiolytic, Antihistamine         |
| CID0000004826 | Antihypertensive, Vasodilator     |
| CID0000004829 | Antidiabetic                      |
| CID0000004830 | Antipsychotic                     |
| CID0000004835 | Antibacterial, Antibiotic         |
| CID0000004839 | Spasmolytic                       |
| CID0000004840 | Analgesic                         |
| CID0000004847 | Anxiolytic                        |
| CID0000004848 | Antiulcerative                    |
| CID0000004865 | Antineoplastic                    |

|              |                                                                           |
|--------------|---------------------------------------------------------------------------|
| CID000004885 | Antioxidant, Antiparkinsonian, Antipsychotic, Antiglaucoma                |
| CID000004888 | Antiinflammatory                                                          |
| CID000004891 | Anthelmintic                                                              |
| CID000004893 | Antihypertensive                                                          |
| CID000004911 | Uricosuric                                                                |
| CID000004912 | Hypolipidemic                                                             |
| CID000004913 | Antiarrhythmic, Antidepressant                                            |
| CID000004917 | Antipsychotic, Antiemetic                                                 |
| CID000004919 | Muscle relaxant, Antiparkinsonian                                         |
| CID000004922 | Spasmolytic                                                               |
| CID000004926 | Anxiolytic                                                                |
| CID000004927 | Antiemetic, Antihistamine                                                 |
| CID000004932 | Antiarrhythmic, Vasodilator                                               |
| CID000004946 | Antihypertensive, Antiarrhythmic, Antidepressant, Antianginal, Anxiolytic |
| CID000004947 | Antioxidant                                                               |
| CID000004957 | Uterine stimulant, Vasodilator                                            |
| CID000004977 | Vasodilator, Muscle relaxant, Antiallergic/Antiasthmatic                  |
| CID000004980 | Psychodysleptic                                                           |
| CID000004990 | Hypolipidemic                                                             |
| CID000004992 | Antihistamine                                                             |
| CID000004993 | Antimalarial                                                              |
| CID000005002 | Antipsychotic                                                             |

|              |                                             |
|--------------|---------------------------------------------|
| CID000005005 | Antihypertensive                            |
| CID000005011 | Uterine stimulant, Antidepressant           |
| CID000005024 | Antipsychotic, Anxiolytic                   |
| CID000005029 | Antiulcerative, Antisecretory (gastric)     |
| CID000005032 | Vasoconstrictor, Antiallergic/Antiasthmatic |
| CID000005035 | Antineoplastic                              |
| CID000005036 | Antithrombotic                              |
| CID000005038 | Antihypertensive                            |
| CID000005039 | Antibiotic, Antihistamine                   |
| CID000005040 | Immunomodulator                             |
| CID000005052 | Antihypertensive                            |
| CID000005070 | Antiparkinsonian                            |
| CID000005072 | Antipsychotic                               |
| CID000005073 | Antipsychotic                               |
| CID000005076 | Antiviral                                   |
| CID000005077 | Antihypertensive, Anti-Alzheimer's Disease  |
| CID000005078 | Analgesic                                   |
| CID000005090 | Antiinflammatory, Analgesic                 |
| CID000005092 | Anxiolytic                                  |
| CID000005097 | Antineoplastic                              |
| CID000005098 | Antidiabetic                                |
| CID000005118 | Radioactive agent, Antipsychotic            |

|              |                                               |
|--------------|-----------------------------------------------|
| CID000005120 | Diagnostic aid                                |
| CID000005136 | Antiinflammatory                              |
| CID000005145 | Analgesic                                     |
| CID000005147 | Analgesic                                     |
| CID000005152 | Antiallergic/Antiasthmatic                    |
| CID000005153 | Antineoplastic                                |
| CID000005154 | Antifungal, Antibiotic                        |
| CID000005155 | Antiviral                                     |
| CID000005160 | Antithrombotic                                |
| CID000005161 | Antiinflammatory, Analgesic                   |
| CID000005184 | Spasmolytic                                   |
| CID000005195 | Antidepressant, Antiparkinsonian              |
| CID000005199 | Laxative                                      |
| CID000005203 | Antidepressant                                |
| CID000005210 | Antidepressant, Antiobesity                   |
| CID000005215 | Antibacterial, Antibiotic                     |
| CID000005218 | Hypolipidemic                                 |
| CID000005244 | Antineoplastic, Antidiabetic                  |
| CID000005253 | Antihypertensive, Antiarrhythmic, Antianginal |
| CID000005255 | Antiallergic/Antiasthmatic                    |
| CID000005257 | Antibacterial, Antibiotic                     |
| CID000005265 | Antipsychotic                                 |

|              |                                           |
|--------------|-------------------------------------------|
| CID000005267 | Diuretic                                  |
| CID000005268 | Antipsychotic                             |
| CID000005281 | Pharmaceutic aid                          |
| CID000005291 | Antineoplastic                            |
| CID000005304 | CNS stimulant                             |
| CID000005311 | Antineoplastic                            |
| CID000005314 | Muscle relaxant                           |
| CID000005318 | Antifungal                                |
| CID000005320 | Antibacterial, Antibiotic                 |
| CID000005328 | Antibacterial, Antibiotic                 |
| CID000005329 | Antibacterial, Antibiotic                 |
| CID000005333 | Antibacterial, Antibiotic                 |
| CID000005335 | Antibacterial, Antibiotic                 |
| CID000005336 | Antibacterial, Antibiotic                 |
| CID000005340 | Antibacterial, Antibiotic                 |
| CID000005342 | Uricosuric                                |
| CID000005344 | Antibacterial, Antibiotic                 |
| CID000005345 | Diagnostic aid                            |
| CID000005352 | Antiinflammatory                          |
| CID000005355 | Antidepressant, Antipsychotic, Antiemetic |
| CID000005356 | Anticonvulsant                            |
| CID000005357 | Antidepressant                            |



|              |                              |
|--------------|------------------------------|
| CID000005358 | Analgesic                    |
| CID000005359 | Antiinflammatory, Analgesic  |
| CID000005361 | Anthelmintic                 |
| CID000005363 | Antineoplastic               |
| CID000005372 | Immunomodulator              |
| CID000005374 | Antihypertensive             |
| CID000005376 | Antineoplastic               |
| CID000005378 | Anxiolytic                   |
| CID000005379 | Antibacterial, Antibiotic    |
| CID000005387 | Antisecretory (gastric)      |
| CID000005394 | Antineoplastic               |
| CID000005396 | Antineoplastic               |
| CID000005401 | Antihypertensive             |
| CID000005402 | Antifungal                   |
| CID000005403 | Antiallergic/Antiasthmatic   |
| CID000005404 | Antifungal                   |
| CID000005405 | Antihistamine                |
| CID000005406 | Antiparkinsonian             |
| CID000005407 | Antineoplastic               |
| CID000005411 | Anesthetic                   |
| CID000005417 | Antihypertensive, Anxiolytic |
| CID000005419 | Vasoconstrictor              |

|              |                                                                                 |
|--------------|---------------------------------------------------------------------------------|
| CID000005426 | Antibacterial, Antiinflammatory, Immunomodulator, Anxiolytic, Sedative/Hypnotic |
| CID000005429 | Vasodilator, Muscle relaxant, Diuretic, Cardiotonic                             |
| CID000005430 | Anthelmintic                                                                    |
| CID000005433 | Antibacterial, Antibiotic                                                       |
| CID000005440 | Antiemetic                                                                      |
| CID000005452 | Antipsychotic, Anxiolytic                                                       |
| CID000005454 | Antipsychotic                                                                   |
| CID000005455 | Antifungal                                                                      |
| CID000005456 | Antibacterial, Antibiotic                                                       |
| CID000005466 | Anticonvulsant                                                                  |
| CID000005467 | Antipsychotic, Antiemetic                                                       |
| CID000005469 | Antiallergic/Antiasthmatic                                                      |
| CID000005472 | Antithrombotic                                                                  |
| CID000005475 | Antiviral                                                                       |
| CID000005478 | Antihypertensive, Analgesic, Antianginal, Antiglaucoma                          |
| CID000005480 | Antiinflammatory, Analgesic                                                     |
| CID000005486 | Antithrombotic, Antianginal                                                     |
| CID000005487 | Spasmolytic                                                                     |
| CID000005496 | Antibacterial, Antibiotic                                                       |
| CID000005505 | Antidiabetic                                                                    |
| CID000005509 | Antiinflammatory                                                                |

|              |                                  |
|--------------|----------------------------------|
| CID000005510 | Antifungal                       |
| CID000005514 | Anticonvulsant                   |
| CID000005515 | Antineoplastic                   |
| CID000005516 | Antineoplastic                   |
| CID000005522 | Anxiolytic                       |
| CID000005523 | Analgesic                        |
| CID000005524 | Antiglaucoma                     |
| CID000005525 | Antihypertensive                 |
| CID000005527 | Antiallergic/Antiasthmatic       |
| CID000005530 | Antidepressant                   |
| CID000005533 | Antidepressant                   |
| CID000005537 | Antihypertensive, Antithrombotic |
| CID000005538 | Antineoplastic                   |
| CID000005546 | Diuretic                         |
| CID000005556 | Anxiolytic, Sedative/Hypnotic    |
| CID000005560 | Antihypertensive, Diuretic       |
| CID000005564 | Disinfectant                     |
| CID000005566 | Antipsychotic, Anxiolytic        |
| CID000005567 | Antipsychotic                    |
| CID000005568 | Antipsychotic                    |
| CID000005572 | Antiparkinsonian, Spasmolytic    |
| CID000005573 | Spasmolytic                      |

|              |                                           |
|--------------|-------------------------------------------|
| CID000005576 | Anticonvulsant                            |
| CID000005578 | Antibacterial, Antibiotic                 |
| CID000005581 | Antiallergic/Antiasthmatic                |
| CID000005583 | Antineoplastic                            |
| CID000005584 | Antidepressant                            |
| CID000005587 | Antihistamine                             |
| CID000005588 | Antihistamine                             |
| CID000005591 | Antihypertensive, Antidiabetic            |
| CID000005593 | Spasmolytic                               |
| CID000005595 | Antiemetic                                |
| CID000005604 | Antineoplastic, Antifungal, Antibacterial |
| CID000005620 | Analgesic                                 |
| CID000005625 | Antiviral                                 |
| CID000005645 | Choleretic                                |
| CID000005651 | Antibacterial, Antibiotic                 |
| CID000005656 | Analgesic, Antidepressant                 |
| CID000005663 | Cardiotonic                               |
| CID000005665 | Anticonvulsant                            |
| CID000005666 | Antidepressant                            |
| CID000005673 | Vasodilator                               |
| CID000005677 | Antidiabetic                              |
| CID000005707 | Muscle relaxant, Analgesic                |

|              |                               |
|--------------|-------------------------------|
| CID000005709 | Vasoconstrictor               |
| CID000005717 | Antiallergic/Antiasthmatic    |
| CID000005718 | Antiviral, Antineoplastic     |
| CID000005719 | Anxiolytic, Sedative/Hypnotic |
| CID000005723 | Antiallergic/Antiasthmatic    |
| CID000005724 | Antihypertensive, Diuretic    |
| CID000005726 | Antiviral                     |
| CID000005731 | Analgesic                     |
| CID000005732 | Anxiolytic, Sedative/Hypnotic |
| CID000005733 | Antiinflammatory, Analgesic   |
| CID000005734 | Anticonvulsant                |
| CID000005735 | Anxiolytic, Sedative/Hypnotic |
| CID000005736 | Anxiolytic                    |
| CID000005771 | Uterine stimulant             |
| CID000005804 | Hypolipidemic                 |
| CID000005853 | Anthelmintic                  |
| CID000005861 | Spasmolytic                   |
| CID000006018 | Anxiolytic                    |
| CID000006054 | Antibiotic                    |
| CID000006077 | Anxiolytic                    |
| CID000006082 | Vasoconstrictor               |
| CID000006101 | Vasodilator                   |

|              |                                                              |
|--------------|--------------------------------------------------------------|
| CID000006181 | Radioactive agent                                            |
| CID000006237 | Vasodilator                                                  |
| CID000006242 | Antihypertensive                                             |
| CID000006244 | Antihypertensive                                             |
| CID000006272 | Radioactive agent                                            |
| CID000006292 | Anxiolytic, Sedative/Hypnotic                                |
| CID000006301 | Antibacterial, Antibiotic                                    |
| CID000006307 | Antihypertensive, Diuretic                                   |
| CID000006468 | Anesthetic                                                   |
| CID000006536 | Hypolipidemic                                                |
| CID000006738 | Analgesic, Disinfectant                                      |
| CID000006855 | Disinfectant                                                 |
| CID000006989 | Antifungal                                                   |
| CID000007019 | Antifungal                                                   |
| CID000007077 | Antihistamine                                                |
| CID000007099 | Disinfectant                                                 |
| CID000007108 | Anthelmintic                                                 |
| CID000007172 | Vasoconstrictor, Muscle relaxant, Antiallergic/Antiasthmatic |
| CID000007184 | Antifungal                                                   |
| CID000007456 | Antifungal, Antioxidant                                      |
| CID000007534 | Spasmolytic                                                  |
| CID000007547 | Disinfectant                                                 |

|              |                               |
|--------------|-------------------------------|
| CID000007608 | Vasoconstrictor               |
| CID000007628 | Antibacterial, Antibiotic     |
| CID000008082 | Antineoplastic                |
| CID000008111 | Hypolipidemic                 |
| CID000008229 | Uterine stimulant             |
| CID000008272 | Diagnostic aid                |
| CID000008456 | Antioxidant                   |
| CID000008593 | Analgesic                     |
| CID000008602 | Analgesic                     |
| CID000008756 | Disinfectant                  |
| CID000009049 | Antimalarial                  |
| CID000009330 | Anxiolytic, Spasmolytic       |
| CID000009417 | Antidepressant, Antipsychotic |
| CID000009426 | Antiamoebic                   |
| CID000009429 | Antipsychotic, Antiemetic     |
| CID000009567 | Anxiolytic, Sedative/Hypnotic |
| CID000009648 | Analgesic                     |
| CID000009934 | Choleretic                    |
| CID000009942 | Analgesic                     |
| CID000009982 | Antianorexic                  |
| CID000010007 | Antianorexic                  |
| CID000010101 | Analgesic                     |

|              |                                           |
|--------------|-------------------------------------------|
| CID000010205 | Antineoplastic, Antibacterial, Antibiotic |
| CID000010212 | Anthelmintic                              |
| CID000010239 | Uricosuric                                |
| CID000010257 | Psychodysleptic                           |
| CID000010302 | Vasodilator                               |
| CID000010517 | Analgesic                                 |
| CID000010579 | Anthelmintic                              |
| CID000010606 | Antithrombotic                            |
| CID000010618 | Analgesic                                 |
| CID000010624 | Psychodysleptic                           |
| CID000010646 | Antihistamine                             |
| CID000010661 | Antianorexic                              |
| CID000010662 | Antifungal, Disinfectant                  |
| CID000010680 | Vasodilator, Spasmolytic                  |
| CID000010745 | Analgesic                                 |
| CID000010834 | Anesthetic                                |
| CID000010930 | Analgesic, Anxiolytic                     |
| CID000011016 | Antineoplastic                            |
| CID000011092 | Antibacterial, Antibiotic                 |
| CID000011095 | Antioxidant                               |
| CID000011291 | Antihistamine                             |
| CID000011366 | Choleretic                                |



|              |                                              |
|--------------|----------------------------------------------|
| CID000011974 | Disinfectant                                 |
| CID000012454 | Antipsychotic                                |
| CID000012550 | Antibiotic                                   |
| CID000012717 | Antineoplastic                               |
| CID000012855 | Anthelmintic                                 |
| CID000013122 | Antihypertensive, Vasodilator, Antipsychotic |
| CID000013314 | Anxiolytic, Sedative/Hypnotic                |
| CID000013333 | Antipsychotic                                |
| CID000013487 | Anthelmintic                                 |
| CID000013493 | Analgesic                                    |
| CID000013683 | Antiallergic/Antiasthmatic                   |
| CID000014251 | Disinfectant                                 |
| CID000014373 | CNS stimulant                                |
| CID000014641 | Antihypertensive, Vasodilator                |
| CID000014707 | Analgesic                                    |
| CID000015139 | Antipsychotic                                |
| CID000015250 | Antiinflammatory, Analgesic                  |
| CID000015330 | Antiinflammatory, Analgesic                  |
| CID000015387 | Antipsychotic                                |
| CID000015443 | Antipsychotic                                |
| CID000015723 | Anxiolytic                                   |
| CID000016106 | Anxiolytic, Sedative/Hypnotic                |

|              |                               |
|--------------|-------------------------------|
| CID000016124 | Pharmaceutic aid              |
| CID000016351 | Antipsychotic                 |
| CID000016362 | Antipsychotic                 |
| CID000016363 | Antipsychotic                 |
| CID000016576 | Antihistamine, Spasmolytic    |
| CID000016622 | Analgesic                     |
| CID000016630 | Antianorexic                  |
| CID000017012 | Antipsychotic, Anxiolytic     |
| CID000017268 | Antihypertensive, Vasodilator |
| CID000017361 | Spasmolytic                   |
| CID000017534 | Antineoplastic                |
| CID000017676 | Antipsychotic                 |
| CID000018026 | Hypolipidemic, Antidiabetic   |
| CID000018140 | Antineoplastic                |
| CID000018367 | Antipsychotic                 |
| CID000018830 | Vasoconstrictor               |
| CID000019009 | Antibacterial, Antibiotic     |
| CID000019143 | Analgesic                     |
| CID000019324 | Anesthetic                    |
| CID000019529 | Antiamoebic                   |
| CID000019660 | Antipsychotic                 |
| CID000019861 | Antihistamine                 |

|              |                           |
|--------------|---------------------------|
| CID000019909 | Antineoplastic            |
| CID000019910 | Antibacterial, Antibiotic |
| CID000020810 | Antihypertensive          |
| CID000020906 | Disinfectant              |
| CID000021109 | Vasodilator               |
| CID000021453 | Antibacterial, Antibiotic |
| CID000021722 | Antidepressant            |
| CID000021760 | Analgesic                 |
| CID000021772 | Antidepressant            |
| CID000021782 | Antifungal                |
| CID000021847 | Spasmolytic               |
| CID000021855 | Antihistamine             |
| CID000021943 | Antibacterial, Antibiotic |
| CID000022526 | Anthelmintic              |
| CID000023480 | Vasodilator               |
| CID000023573 | Antiparkinsonian          |
| CID000023576 | Antihypertensive          |
| CID000023647 | Antiinflammatory          |
| CID000023897 | Antipsychotic             |
| CID000024199 | Spasmolytic               |
| CID000024466 | Antineoplastic            |
| CID000025293 | Antipsychotic             |

|              |                                         |
|--------------|-----------------------------------------|
| CID000026248 | Antiinflammatory                        |
| CID000026388 | Antiemetic                              |
| CID000027400 | Antidepressant                          |
| CID000028329 | Choleretic, Muscle relaxant             |
| CID000028397 | Analgesic                               |
| CID000029142 | Antineoplastic                          |
| CID000029661 | Antibacterial, Antibiotic               |
| CID000030668 | Antihypertensive                        |
| CID000031281 | Disinfectant                            |
| CID000031348 | Antiulcerative, Antipsychotic           |
| CID000031404 | Antioxidant                             |
| CID000031508 | Antiinflammatory                        |
| CID000031765 | Antipsychotic                           |
| CID000031771 | Antibacterial, Antibiotic               |
| CID000032593 | Antipsychotic                           |
| CID000032800 | Choleretic                              |
| CID000033014 | Antidepressant                          |
| CID000033176 | Analgesic                               |
| CID000033334 | Immunomodulator                         |
| CID000033584 | Hypolipidemic, Antidiabetic, Uricosuric |
| CID000033625 | Antihypertensive                        |
| CID000033630 | Antipsychotic                           |

|              |                                               |
|--------------|-----------------------------------------------|
| CID000033675 | Antiinflammatory                              |
| CID000034312 | Anticonvulsant                                |
| CID000034458 | Muscle relaxant, Anxiolytic                   |
| CID000034521 | Antidepressant                                |
| CID000034870 | CNS stimulant                                 |
| CID000035758 | Antihistamine                                 |
| CID000036354 | Antianginal                                   |
| CID000036663 | Antiinflammatory                              |
| CID000036811 | Cardiotonic                                   |
| CID000036920 | Antihypertensive, Antiarrhythmic, Antianginal |
| CID000037015 | Antidepressant, Anxiolytic                    |
| CID000037393 | Antimalarial                                  |
| CID000037632 | Antidepressant, Anxiolytic                    |
| CID000037990 | Antiallergic/Antiasthmatic                    |
| CID000038207 | Antidepressant                                |
| CID000038258 | Antibiotic                                    |
| CID000038409 | Antihypertensive, Diuretic, Uricosuric        |
| CID000038778 | Antineoplastic                                |
| CID000039042 | Hypolipidemic                                 |
| CID000039385 | Antifungal                                    |
| CID000039689 | Muscle relaxant                               |
| CID000039860 | Anxiolytic, Antiemetic                        |

|              |                                         |
|--------------|-----------------------------------------|
| CID000039974 | Antihypertensive                        |
| CID000040586 | Antibiotic                              |
| CID000040589 | Antidepressant                          |
| CID000041531 | Analgesic                               |
| CID000041693 | Analgesic                               |
| CID000041987 | Antidepressant                          |
| CID000042470 | Spasmolytic                             |
| CID000042574 | Anthelmintic                            |
| CID000042723 | Antineoplastic                          |
| CID000042760 | Antiinflammatory, Analgesic             |
| CID000042785 | Antineoplastic                          |
| CID000042923 | Antithrombotic                          |
| CID000043103 | Antidepressant                          |
| CID000043585 | Antiinflammatory, Analgesic             |
| CID000044571 | Antidepressant                          |
| CID000044668 | Antidepressant                          |
| CID000045070 | Antiallergic/Antiasthmatic, Spasmolytic |
| CID000047319 | Muscle relaxant                         |
| CID000047472 | Antifungal                              |
| CID000049381 | Muscle relaxant, Anxiolytic             |
| CID000050515 | Antineoplastic                          |
| CID000051045 | Antihypertensive                        |

|              |                                |
|--------------|--------------------------------|
| CID000051081 | Antibacterial, Antibiotic      |
| CID000051174 | Antipsychotic                  |
| CID000051263 | Analgesic                      |
| CID000051323 | Antineoplastic                 |
| CID000051550 | Antithrombotic                 |
| CID000051576 | Hypolipidemic                  |
| CID000051577 | Antidiabetic                   |
| CID000053001 | Antithrombotic                 |
| CID000053276 | Analgesic                      |
| CID000053421 | Vasodilator                    |
| CID000053432 | Antidepressant                 |
| CID000053569 | Anticonvulsant, Antidepressant |
| CID000053708 | Cardiotonic                    |
| CID000054343 | Antithrombotic, Vasodilator    |
| CID000054369 | Antineoplastic                 |
| CID000054410 | Antihypertensive               |
| CID000054547 | Antibacterial, Antibiotic      |
| CID000054586 | Antineoplastic                 |
| CID000054742 | Antipsychotic                  |
| CID000054897 | Anxiolytic                     |
| CID000054929 | Antineoplastic                 |
| CID000054940 | Antipsychotic                  |

|              |                            |
|--------------|----------------------------|
| CID000055036 | Antiparkinsonian           |
| CID000055191 | Antidepressant, Anxiolytic |
| CID000055445 | Antipsychotic              |
| CID000055645 | Antineoplastic             |
| CID000055718 | Antidepressant             |
| CID000055752 | Antipsychotic              |
| CID000055918 | Cardiotonic                |
| CID000056237 | Antipsoriatic              |
| CID000056463 | Analgesic                  |
| CID000056487 | Antineoplastic             |
| CID000056971 | Anxiolytic                 |
| CID000057030 | Antineoplastic             |
| CID000057109 | Antiallergic/Antiasthmatic |
| CID000057327 | Antihypertensive           |
| CID000057469 | Antiviral, Immunomodulator |
| CID000057520 | Antihistamine              |
| CID000057537 | Antiparkinsonian           |
| CID000058505 | Antiarrhythmic             |
| CID000059692 | Antiemetic                 |
| CID000059693 | Antineoplastic             |
| CID000059757 | Antipsoriatic              |
| CID000060149 | Antipsychotic              |



|              |                                              |
|--------------|----------------------------------------------|
| CID000060172 | Antiviral                                    |
| CID000060182 | Spasmolytic, Antianorexic                    |
| CID000060404 | Antithrombotic                               |
| CID000060490 | Antiinflammatory                             |
| CID000060539 | Antiallergic/Antiasthmatic                   |
| CID000060542 | Antiinflammatory, Analgesic                  |
| CID000060547 | Antipsychotic                                |
| CID000060618 | Analgesic                                    |
| CID000060691 | Cognition enhancer, Anti-Alzheimer's Disease |
| CID000060698 | Analgesic                                    |
| CID000060703 | Antipsychotic                                |
| CID000060719 | Antiallergic/Antiasthmatic                   |
| CID000060753 | Antiarrhythmic                               |
| CID000060769 | Anxiolytic                                   |
| CID000060785 | Antipsychotic                                |
| CID000060791 | Antineoplastic                               |
| CID000060795 | Antipsychotic                                |
| CID000060796 | Antineoplastic                               |
| CID000060809 | Anti-Alzheimer's Disease                     |
| CID000060813 | Anxiolytic                                   |
| CID000060816 | Antipsoriatic                                |
| CID000060820 | Antipsychotic                                |

|              |                                           |
|--------------|-------------------------------------------|
| CID000060831 | Antiallergic/Antiasthmatic                |
| CID000060854 | Antipsychotic                             |
| CID000060856 | Antiallergic/Antiasthmatic                |
| CID000060858 | Sedative/Hypnotic                         |
| CID000060862 | Antipsychotic, Anti-Alzheimer's Disease   |
| CID000060865 | Antihistamine, Antiallergic/Antiasthmatic |
| CID000060867 | Cardiotonic                               |
| CID000060879 | Antihypertensive                          |
| CID000060910 | Antiatherosclerotic                       |
| CID000060932 | Antidepressant                            |
| CID000060939 | Antiarrhythmic                            |
| CID000061996 | Analgesic                                 |
| CID000062065 | Psychodysleptic                           |
| CID000062156 | Analgesic                                 |
| CID000062518 | Analgesic                                 |
| CID000062751 | Psychodysleptic                           |
| CID000062865 | Anxiolytic                                |
| CID000062867 | Antipsychotic                             |
| CID000063062 | Analgesic                                 |
| CID000063114 | Muscle relaxant, Anticonvulsant           |
| CID000064929 | Hypolipidemic                             |
| CID000065036 | Hypolipidemic, Antibiotic                 |

|              |                                           |
|--------------|-------------------------------------------|
| CID000065130 | Antifungal, Disinfectant                  |
| CID000065450 | Antibacterial, Antibiotic                 |
| CID000065490 | Antipsychotic                             |
| CID000065535 | Antiparkinsonian, Spasmolytic             |
| CID000065558 | Antineoplastic                            |
| CID000065567 | Antineoplastic                            |
| CID000065630 | Antihypertensive, Anxiolytic              |
| CID000065636 | Antihypertensive, Antihistamine           |
| CID000065637 | Antiarrhythmic                            |
| CID000065650 | Antidepressant                            |
| CID000065673 | Antidiabetic, Antiglaucoma                |
| CID000065675 | Antihypertensive                          |
| CID000065750 | Muscle relaxant, Anxiolytic               |
| CID000065775 | Antiparkinsonian                          |
| CID000065827 | Antidepressant                            |
| CID000065832 | Vasodilator                               |
| CID000065889 | Antithrombotic                            |
| CID000065906 | Antihistamine, Antiallergic/Antiasthmatic |
| CID000065914 | Anticonvulsant                            |
| CID000065922 | Antiatherosclerotic                       |
| CID000065923 | Antihypertensive                          |
| CID000065927 | Antithrombotic                            |

|              |                                                                       |
|--------------|-----------------------------------------------------------------------|
| CID000065933 | Antiallergic/Antiasthmatic                                            |
| CID000065939 | Analgesic, Antiemetic                                                 |
| CID000065971 | Antithrombotic                                                        |
| CID000065997 | Antiemetic                                                            |
| CID000065999 | Antihypertensive                                                      |
| CID000066120 | Diuretic                                                              |
| CID000066160 | Anticonvulsant, Sedative/Hypnotic                                     |
| CID000066270 | Muscle relaxant, Analgesic, Antidepressant, CNS stimulant, Anesthetic |
| CID000066644 | Analgesic                                                             |
| CID000067686 | Antifungal                                                            |
| CID000068066 | Antibiotic                                                            |
| CID000068089 | Analgesic                                                             |
| CID000068186 | Antipsychotic                                                         |
| CID000068593 | Antidiabetic                                                          |
| CID000068604 | Antipsychotic                                                         |
| CID000068663 | Antipsychotic                                                         |
| CID000068678 | Muscle relaxant, Antipsychotic, Antiemetic                            |
| CID000068704 | Antiinflammatory                                                      |
| CID000068714 | Antipsychotic                                                         |
| CID000068717 | Antidepressant                                                        |
| CID000068725 | Antiemetic                                                            |
| CID000068751 | Antipsychotic                                                         |

|              |                                                                    |
|--------------|--------------------------------------------------------------------|
| CID000068760 | Antibacterial, Antibiotic                                          |
| CID000068765 | Antiinflammatory                                                   |
| CID000068778 | Antiparkinsonian                                                   |
| CID000068806 | Antiinflammatory                                                   |
| CID000068871 | Antidepressant, Antiparkinsonian                                   |
| CID000068883 | Analgesic, Antidepressant                                          |
| CID000068916 | Antibacterial, Antibiotic                                          |
| CID000068928 | Antimalarial                                                       |
| CID000068942 | Antithrombotic                                                     |
| CID000068950 | Antihistamine                                                      |
| CID000069506 | Antifungal, Antibacterial, Antibiotic                              |
| CID000069550 | Muscle relaxant, Diuretic, Cardiotonic, Antiallergic/Antiasthmatic |
| CID000070846 | Antithrombotic                                                     |
| CID000071101 | Antipsychotic                                                      |
| CID000071128 | Analgesic                                                          |
| CID000071144 | Antihypertensive                                                   |
| CID000071149 | Muscle relaxant, Antiallergic/Antiasthmatic                        |
| CID000071202 | Antiparkinsonian                                                   |
| CID000071237 | Antiinflammatory                                                   |
| CID000071246 | Antiinflammatory                                                   |
| CID000071255 | Antiallergic/Antiasthmatic                                         |
| CID000071257 | Anxiolytic                                                         |

|              |                                  |
|--------------|----------------------------------|
| CID000071301 | Antihypertensive                 |
| CID000071306 | Antineoplastic                   |
| CID000071307 | Antidepressant, Antiparkinsonian |
| CID000071321 | Antiinflammatory                 |
| CID000071329 | Antiarrhythmic                   |
| CID000071349 | Antineoplastic                   |
| CID000071350 | Antiallergic/Antiasthmatic       |
| CID000071351 | Antipsychotic                    |
| CID000071355 | Hypolipidemic                    |
| CID000071360 | Antipsychotic                    |
| CID000071453 | Antithrombotic                   |
| CID000071651 | Anticonvulsant                   |
| CID000071697 | Antiinflammatory                 |
| CID000071750 | Antineoplastic                   |
| CID000071751 | Antiinflammatory                 |
| CID000071781 | Anxiolytic                       |
| CID000071815 | Antamebic                        |
| CID000071894 | Choleretic, Diuretic             |
| CID000071923 | Spasmolytic                      |
| CID000071976 | Antidiabetic                     |
| CID000072035 | Antineoplastic                   |
| CID000072038 | Antipsychotic                    |

|              |                                       |
|--------------|---------------------------------------|
| CID000072116 | Antineoplastic                        |
| CID000072119 | Antidepressant                        |
| CID000072139 | Antipsoriatic                         |
| CID000072171 | Antisecretory (gastric)               |
| CID000072300 | Antifungal, Antibacterial, Antibiotic |
| CID000072303 | Antifungal, Antibacterial, Antibiotic |
| CID000072474 | Antibacterial, Antibiotic             |
| CID000072928 | Antiulcerative                        |
| CID000072938 | Antibacterial, Antibiotic             |
| CID000073342 | Antifungal                            |
| CID000073549 | Antifungal                            |
| CID000077999 | Antidiabetic                          |
| CID000082146 | Antineoplastic                        |
| CID000082148 | Antidepressant                        |
| CID000086821 | Hypolipidemic                         |
| CID000086838 | Antineoplastic                        |
| CID000090895 | Antiallergic/Antiasthmatic            |
| CID000093054 | Muscle relaxant                       |
| CID000094342 | Antihypertensive                      |
| CID000094777 | Antiinflammatory, Analgesic           |
| CID000100146 | Antineoplastic                        |
| CID000100208 | Antineoplastic                        |

|              |                              |
|--------------|------------------------------|
| CID000101745 | Antimalarial                 |
| CID000104181 | Antidepressant               |
| CID000104745 | Pharmaceutic aid, Antifungal |
| CID000104850 | Antiobesity                  |
| CID000104865 | Antihypertensive             |
| CID000104867 | Antibiotic                   |
| CID000104928 | Antihypertensive             |
| CID000107786 | CNS stimulant, Antianorexic  |
| CID000107805 | Antineoplastic               |
| CID000107822 | Analgesic, Antiemetic        |
| CID000107867 | Antiarrhythmic               |
| CID000107970 | Immunomodulator              |
| CID000107996 | Analgesic                    |
| CID000108042 | Antiviral, Antineoplastic    |
| CID000108092 | Antihistamine                |
| CID000108143 | Antineoplastic               |
| CID000108182 | Antiemetic                   |
| CID000114709 | Anticonvulsant               |
| CID000114827 | Anxiolytic                   |
| CID000114840 | Antiarrhythmic, Cardiotonic  |
| CID000114903 | Antiparkinsonian             |
| CID000115208 | Analgesic                    |



|              |                                              |
|--------------|----------------------------------------------|
| CID000115237 | Antipsychotic                                |
| CID000119192 | Antipsychotic                                |
| CID000119373 | Antineoplastic                               |
| CID000119607 | Antiinflammatory, Analgesic                  |
| CID000120533 | Antibacterial, Antibiotic                    |
| CID000121852 | Antidepressant, Anxiolytic                   |
| CID000121925 | Antihypertensive                             |
| CID000122077 | Antineoplastic                               |
| CID000122116 | Antihypertensive                             |
| CID000122226 | Cognition enhancer, Anti-Alzheimer's Disease |
| CID000122252 | Antidepressant                               |
| CID000122316 | Antiparkinsonian, Cognition enhancer         |
| CID000122544 | Antiatherosclerotic                          |
| CID000122737 | Antineoplastic                               |
| CID000122799 | Antineoplastic, Antibiotic                   |
| CID000122903 | Pharmaceutic aid                             |
| CID000123015 | Antineoplastic                               |
| CID000123618 | Antihistamine, Antiallergic/Antiasthmatic    |
| CID000123619 | Antiinflammatory, Analgesic                  |
| CID000123631 | Antineoplastic                               |
| CID000123642 | Analgesic                                    |
| CID000123697 | Antihypertensive                             |

|              |                                              |
|--------------|----------------------------------------------|
| CID000123917 | Antineoplastic                               |
| CID000124087 | Antihistamine                                |
| CID000124270 | Antiallergic/Antiasthmatic                   |
| CID000125017 | Antidepressant                               |
| CID000125368 | Antidepressant                               |
| CID000127912 | Antipsychotic                                |
| CID000128010 | Antipsychotic                                |
| CID000129109 | Antihypertensive                             |
| CID000129796 | Antiallergic/Antiasthmatic                   |
| CID000130400 | Antiarrhythmic                               |
| CID000130506 | Antiinflammatory, Antiallergic/Antiasthmatic |
| CID000130639 | Antiallergic/Antiasthmatic                   |
| CID000130918 | Antidepressant, Anxiolytic                   |
| CID000131411 | Antiviral                                    |
| CID000131460 | Anti-Alzheimer's Disease                     |
| CID000132190 | Antipsychotic, Anxiolytic                    |
| CID000133106 | Antiparkinsonian                             |
| CID000133621 | Antihypertensive                             |
| CID000134018 | Uricosuric                                   |
| CID000134290 | Antihypertensive                             |
| CID000148191 | Antineoplastic                               |
| CID000148193 | Antineoplastic                               |

|              |                                    |
|--------------|------------------------------------|
| CID000151075 | Antiinflammatory                   |
| CID000151166 | Antiinflammatory, Analgesic        |
| CID000151170 | Antiinflammatory                   |
| CID000151172 | Antiarrhythmic, Antianginal        |
| CID000151194 | Antineoplastic                     |
| CID000154000 | Antidiabetic                       |
| CID000154575 | Antiallergic/Antiasthmatic         |
| CID000155774 | Cardiotonic                        |
| CID000156328 | Antiparkinsonian                   |
| CID000156414 | Antineoplastic                     |
| CID000156422 | Antipsoriatic, Antiinflammatory    |
| CID000156874 | Antihypertensive                   |
| CID000158621 | Antidepressant                     |
| CID000159271 | Antiinflammatory, Analgesic        |
| CID000160109 | Antihypertensive, Antiglaucoma     |
| CID000161898 | Antineoplastic                     |
| CID000162834 | Anxiolytic                         |
| CID000164089 | Antihypertensive                   |
| CID000166535 | Antipsychotic                      |
| CID000166558 | Hypolipidemic, Antiatherosclerotic |
| CID000166564 | Antiinflammatory                   |
| CID000168089 | Antihypertensive, Vasodilator      |

|              |                                                  |
|--------------|--------------------------------------------------|
| CID000170377 | Antipsoriatic                                    |
| CID000172286 | Antipsychotic                                    |
| CID000176167 | Antineoplastic                                   |
| CID000176870 | Antineoplastic                                   |
| CID000177347 | Antineoplastic                                   |
| CID000177941 | Antineoplastic                                   |
| CID000179342 | Antiparkinsonian                                 |
| CID000190763 | Antineoplastic                                   |
| CID000192306 | Antiallergic/Antiasthmatic                       |
| CID000193962 | Antiviral                                        |
| CID000197033 | Antihistamine                                    |
| CID000198752 | Anti-Alzheimer's Disease                         |
| CID000198792 | Antiparkinsonian                                 |
| CID000204102 | Antithrombotic                                   |
| CID000204106 | Antiinflammatory, Analgesic                      |
| CID000206042 | Antineoplastic                                   |
| CID000206044 | Hypolipidemic, Antidiabetic, Antiatherosclerotic |
| CID000208898 | Antiarrhythmic                                   |
| CID000208904 | Antidepressant, Anxiolytic                       |
| CID000208908 | Antineoplastic                                   |
| CID000208910 | Antiinflammatory, Analgesic                      |
| CID000208917 | Antipsychotic                                    |

|              |                            |
|--------------|----------------------------|
| CID000208923 | Antihypertensive           |
| CID000208951 | Antipsychotic              |
| CID000213043 | Antibacterial              |
| CID000216237 | Vasodilator                |
| CID000216239 | Antineoplastic             |
| CID000216294 | Antiinflammatory           |
| CID000216325 | Antiatherosclerotic        |
| CID000216467 | Antineoplastic             |
| CID000216468 | Antineoplastic             |
| CID000219048 | Antidiabetic               |
| CID000219050 | Antipsychotic              |
| CID000233502 | Antineoplastic             |
| CID000234783 | Antiulcerative             |
| CID000234846 | Antihypertensive           |
| CID000236184 | Antineoplastic             |
| CID000237254 | Antineoplastic, Antibiotic |
| CID000238782 | Antifungal                 |
| CID000247955 | Antineoplastic             |
| CID000248010 | Antibiotic                 |
| CID000248507 | Laxative, Choleric         |
| CID000251561 | Vasodilator                |
| CID000253083 | Antiviral                  |

|              |                             |
|--------------|-----------------------------|
| CID000256411 | Antineoplastic              |
| CID000261185 | Muscle relaxant             |
| CID000263976 | Antiviral                   |
| CID000266767 | Antineoplastic              |
| CID000266934 | Antithrombotic              |
| CID000273032 | Analgesic                   |
| CID000279063 | Antineoplastic              |
| CID000284240 | Antiviral                   |
| CID000284995 | Antibiotic, Immunomodulator |
| CID000285225 | Antiinflammatory            |
| CID000313325 | Laxative                    |
| CID000320761 | Pharmaceutic aid            |
| CID000323701 | Antineoplastic              |
| CID000327045 | Antineoplastic              |
| CID000327378 | Anthelmintic, Disinfectant  |
| CID000330164 | Antineoplastic              |
| CID000352555 | Antiviral                   |
| CID000352992 | Antiviral                   |
| CID000353481 | Antifungal, Antibiotic      |
| CID000354624 | Antineoplastic              |
| CID000360682 | Antineoplastic              |
| CID000360849 | Antiviral, Immunomodulator  |

|              |                                              |
|--------------|----------------------------------------------|
| CID000362949 | Antiviral                                    |
| CID000383414 | Antisecretory (gastric)                      |
| CID000386483 | Antiviral                                    |
| CID000389644 | Antineoplastic                               |
| CID000408120 | Analgesic                                    |
| CID000413349 | Antibiotic                                   |
| CID000415541 | Antineoplastic, Hypolipidemic                |
| CID000416119 | Antiinflammatory                             |
| CID000418931 | Antibacterial, Antibiotic                    |
| CID000421884 | Antineoplastic                               |
| CID000422111 | Antineoplastic                               |
| CID000424631 | Antiparkinsonian                             |
| CID000426058 | Antibiotic                                   |
| CID000430245 | Analgesic                                    |
| CID000433449 | Antineoplastic                               |
| CID000433902 | Antineoplastic                               |
| CID000439739 | Antineoplastic                               |
| CID000443423 | Antihypertensive, Antiallergic/Antiasthmatic |
| CID000449035 | Uricosuric                                   |
| CID000449193 | Antiallergic/Antiasthmatic                   |
| CID000466146 | Antiviral                                    |
| CID000481696 | Antibacterial, Antibiotic                    |

|              |                                                               |
|--------------|---------------------------------------------------------------|
| CID000494161 | Antineoplastic                                                |
| CID000494471 | Muscle relaxant                                               |
| CID000518962 | Analgesic                                                     |
| CID000521372 | Anticonvulsant, CNS stimulant, Anxiolytic, Sedative/Hypnotic  |
| CID000521440 | Antiinflammatory, Antiallergic/Antiasthmatic                  |
| CID000546807 | Antiinflammatory                                              |
| CID000573837 | Antineoplastic                                                |
| CID000582362 | Antibacterial, Antibiotic                                     |
| CID000588785 | Antibacterial, Antibiotic                                     |
| CID000594168 | Antibacterial, Antibiotic, Antiamebic                         |
| CID000610479 | Antiinflammatory, Analgesic                                   |
| CID000612747 | Antihypertensive                                              |
| CID000626931 | Cardiotonic                                                   |
| CID000644102 | Diagnostic aid                                                |
| CID000644241 | Antineoplastic                                                |
| CID001548992 | Antihistamine                                                 |
| CID002132298 | Antiinflammatory, Analgesic                                   |
| CID002734673 | Antiinflammatory, Analgesic                                   |
| CID003018598 | Antidepressant                                                |
| CID003022645 | Antihypertensive, Antiinflammatory, Analgesic, Antidepressant |
| CID003025811 | Hypolipidemic, Hypocholesterolemic, Antiatherosclerotic       |
| CID003025955 | Analgesic                                                     |



|              |                                            |
|--------------|--------------------------------------------|
| CID003025998 | Antidiabetic                               |
| CID003033962 | Antiarrhythmic                             |
| CID003035241 | Antiemetic                                 |
| CID003047716 | Antineoplastic                             |
| CID003047849 | Analgesic                                  |
| CID003052780 | Antipsychotic                              |
| CID003058746 | Anticonvulsant, Antiulcerative, Anxiolytic |
| CID003058754 | Antiinflammatory, Analgesic                |
| CID003062316 | Antineoplastic                             |
| CID003081087 | Antihistamine, Antisecretory (gastric)     |
| CID003081361 | Antineoplastic                             |
| CID003081927 | Antiatherosclerotic                        |
| CID003082387 | Anxiolytic                                 |
| CID003086142 | Antihypertensive                           |
| CID003086153 | Antipsychotic                              |
| CID003086644 | Antithrombotic                             |
| CID003086668 | Antiinflammatory, Immunomodulator          |
| CID003086685 | Antineoplastic                             |
| CID003086686 | Antineoplastic                             |
| CID003318754 | Hypolipidemic, Hypocholesterolemic         |
| CID003478439 | Antineoplastic                             |
| CID003504707 | Antiglaucoma                               |

|              |                                    |
|--------------|------------------------------------|
| CID003579812 | Antiviral                          |
| CID003691183 | Antihypertensive                   |
| CID003717450 | Antineoplastic                     |
| CID003794430 | Antineoplastic                     |
| CID003807559 | Antiallergic/Antiasthmatic         |
| CID003823887 | Antineoplastic                     |
| CID003834960 | Diagnostic aid                     |
| CID003907483 | Antiviral                          |
| CID003966372 | Analgesic                          |
| CID004065234 | Antifungal                         |
| CID004118151 | Antipsychotic                      |
| CID004129359 | Hypolipidemic, Antiinflammatory    |
| CID004183806 | Antiulcerative                     |
| CID004329839 | Antidiabetic                       |
| CID004330618 | Anthelmintic                       |
| CID004474936 | Antihypertensive                   |
| CID004476321 | Antineoplastic                     |
| CID004488490 | Antihypertensive                   |
| CID004490624 | Hypolipidemic, Hypocholesterolemic |
| CID004491165 | Narcotic antagonist                |
| CID004549312 | Vasodilator                        |
| CID004561569 | Analgesic                          |

|              |                                    |
|--------------|------------------------------------|
| CID004580358 | Antibacterial, Antibiotic          |
| CID004584640 | Diagnostic aid                     |
| CID004587175 | Antibiotic                         |
| CID004630412 | Antibacterial, Antibiotic          |
| CID004630913 | Antidiabetic                       |
| CID004630917 | Analgesic, Narcotic antagonist     |
| CID004631610 | Antithrombotic                     |
| CID004636595 | Hypocholesterolemic                |
| CID004636596 | Hypolipidemic                      |
| CID004659568 | Antiparkinsonian                   |
| CID004659569 | Antiparkinsonian                   |
| CID004663848 | Antibacterial, Antibiotic          |
| CID004677798 | Hypolipidemic, Hypocholesterolemic |
| CID004687013 | Antihypertensive                   |
| CID004715169 | Anticonvulsant                     |
| CID004913274 | Antipsychotic                      |
| CID004979942 | Hypolipidemic                      |
| CID004990817 | Antineoplastic                     |
| CID005023925 | Antiobesity                        |
| CID005034185 | Antithrombotic                     |
| CID005080908 | Antibiotic                         |
| CID005206924 | Antibacterial, Antibiotic          |

|              |                                                           |
|--------------|-----------------------------------------------------------|
| CID005213527 | Antineoplastic                                            |
| CID005229711 | Uterine stimulant                                         |
| CID005230270 | Antihypertensive, Vasodilator                             |
| CID005230878 | Antiallergic/Antiasthmatic                                |
| CID005231054 | Antifungal                                                |
| CID005251896 | Antidiabetic                                              |
| CID005259655 | Antidepressant                                            |
| CID005275741 | Antiinflammatory                                          |
| CID005280442 | Antiviral                                                 |
| CID005280443 | Antineoplastic, Antioxidant                               |
| CID005280567 | Choleretic, Spasmolytic                                   |
| CID005280953 | Antiparkinsonian                                          |
| CID005281051 | Antiviral                                                 |
| CID005281605 | Antiinflammatory, Antioxidant, Antiallergic/Antiasthmatic |
| CID005284402 | Cardiotonic                                               |
| CID005284561 | Analgesic                                                 |
| CID005288320 | Uricosuric                                                |
| CID005310993 | Hypolipidemic                                             |
| CID005328940 | Antineoplastic                                            |
| CID005358385 | Antiviral, Antiinflammatory                               |
| CID005362399 | Cardiotonic                                               |
| CID005464105 | Antiparkinsonian                                          |

|              |                                         |
|--------------|-----------------------------------------|
| CID005466794 | Antineoplastic                          |
| CID005494449 | Antineoplastic                          |
| CID006421038 | Antihypertensive, Analgesic             |
| CID006426711 | Antianginal                             |
| CID006433099 | Antineoplastic                          |
| CID006433111 | Antidiabetic                            |
| CID006433115 | Immunomodulator                         |
| CID006433117 | Antiallergic/Antiasthmatic              |
| CID006433119 | Antithrombotic                          |
| CID006450813 | Sedative/Hypnotic                       |
| CID006450815 | Antidepressant                          |
| CID006450819 | Antithrombotic                          |
| CID006451149 | Antiemetic                              |
| CID006850813 | Antidepressant                          |
| CID006916025 | Diagnostic aid, Antisecretory (gastric) |
| CID006918236 | Analgesic                               |
| CID006918314 | Antidepressant                          |
| CID006918540 | Hypolipidemic                           |
| CID009795739 | Antipsychotic                           |
| CID009796459 | Laxative                                |
| CID009799888 | Antipsoriatic                           |
| CID009800339 | Antiallergic/Antiasthmatic              |

|              |                                                  |
|--------------|--------------------------------------------------|
| CID009804072 | Anxiolytic                                       |
| CID009804157 | Antineoplastic                                   |
| CID009805719 | Cognition enhancer                               |
| CID009815758 | Antineoplastic                                   |
| CID009817332 | Antiemetic                                       |
| CID009818231 | Antipsoriatic, Antiinflammatory, Immunomodulator |
| CID009820008 | Antiinflammatory, Immunomodulator                |
| CID009823820 | Antineoplastic                                   |
| CID009837966 | Antidepressant, Anxiolytic                       |
| CID009838180 | Antibiotic                                       |
| CID009838389 | Antiparkinsonian                                 |
| CID009843089 | Antiinflammatory, Analgesic                      |
| CID009844747 | Antihypertensive                                 |
| CID009849616 | Antiobesity                                      |
| CID009851652 | Antiatherosclerotic                              |
| CID009852353 | Antineoplastic                                   |
| CID009853053 | Hypolipidemic, Hypocholesterolemic               |
| CID009853499 | Antiinflammatory, Analgesic                      |
| CID009859767 | Antineoplastic                                   |
| CID009861622 | Antiobesity                                      |
| CID009862248 | Hypocholesterolemic                              |
| CID009865384 | Analgesic, Antidepressant                        |

|              |                            |
|--------------|----------------------------|
| CID009865515 | Antineoplastic             |
| CID009867822 | Antineoplastic             |
| CID009868368 | Antibacterial              |
| CID009881626 | Sedative/Hypnotic          |
| CID009883481 | Antiallergic/Antiasthmatic |
| CID009888017 | Antiinflammatory           |
| CID009888224 | Anticonvulsant, Anxiolytic |
| CID009890377 | Antiallergic/Antiasthmatic |
| CID009890723 | Antihypertensive           |
| CID009892366 | Antidiabetic               |
| CID009894460 | Antihypertensive           |
| CID009896267 | Antiallergic/Antiasthmatic |
| CID009896918 | Antiallergic/Antiasthmatic |
| CID009903970 | Antipsychotic              |
| CID009904258 | Anticonvulsant             |
| CID009907323 | Antidepressant             |
| CID009910951 | Antidiabetic               |
| CID009911830 | Antineoplastic             |
| CID009914310 | Analgesic                  |
| CID009929347 | Analgesic                  |
| CID009939609 | Antiatherosclerotic        |
| CID009948797 | Antisecretory (gastric)    |

|              |                                    |
|--------------|------------------------------------|
| CID009951154 | Antiallergic/Antiasthmatic         |
| CID009952054 | Radioactive agent, Diagnostic aid  |
| CID009953065 | Cardiotonic                        |
| CID009953887 | Antidiabetic                       |
| CID009955657 | Antiallergic/Antiasthmatic         |
| CID009961746 | Antihypertensive                   |
| CID009963430 | Antifungal                         |
| CID009992142 | Antihypertensive, Antiparkinsonian |
| CID010017546 | Analgesic, Narcotic antagonist     |
| CID010026128 | Hypocholesterolemic                |
| CID010052040 | Antiobesity                        |
| CID010060538 | Antiparkinsonian                   |
| CID010113978 | Antineoplastic                     |
| CID010114058 | Antipsychotic                      |
| CID010117987 | Antiparkinsonian                   |
| CID010127622 | Antineoplastic                     |
| CID010151715 | Antipsoriatic, Antiinflammatory    |
| CID010152529 | Antiobesity                        |
| CID010173280 | Vasodilator                        |
| CID010182969 | Antithrombotic                     |
| CID010198800 | Antipsychotic                      |
| CID010202048 | Antineoplastic                     |



|              |                                          |
|--------------|------------------------------------------|
| CID010216733 | Hypocholesterolemic, Antiatherosclerotic |
| CID010219795 | Antidepressant                           |
| CID010220180 | Anticonvulsant                           |
| CID010224267 | Anti-Alzheimer's Disease                 |
| CID010232719 | Antiemetic                               |
| CID010247592 | Antipsychotic                            |
| CID010257218 | Analgesic                                |
| CID010275777 | Antithrombotic                           |
| CID010296883 | Immunomodulator                          |
| CID010302451 | Antineoplastic                           |
| CID010319293 | Antihypertensive                         |
| CID010408902 | Antidepressant                           |
| CID010465263 | Antiobesity                              |
| CID010475845 | Antihypertensive                         |
| CID010477292 | Antidiabetic                             |
| CID010549838 | Antithrombotic                           |
| CID011163584 | Antidiabetic                             |
| CID011167602 | Antineoplastic                           |
| CID011169048 | Analgesic                                |
| CID011306691 | Antidiabetic                             |
| CID011338777 | Antidiabetic                             |
| CID011364450 | Antiinflammatory                         |

|              |                                              |
|--------------|----------------------------------------------|
| CID011372756 | Anti-Alzheimer's Disease                     |
| CID011420643 | Antidiabetic                                 |
| CID011428861 | Antidiabetic                                 |
| CID011430856 | Anxiolytic                                   |
| CID011451527 | Antineoplastic                               |
| CID011467167 | Antiallergic/Antiasthmatic                   |
| CID011485656 | Antineoplastic                               |
| CID011497983 | Antineoplastic                               |
| CID011576663 | Cognition enhancer, Anti-Alzheimer's Disease |
| CID011597571 | Antineoplastic                               |
| CID011604525 | Antithrombotic                               |
| CID011622909 | Antidepressant                               |
| CID011635624 | Antithrombotic                               |
| CID011640390 | Antineoplastic                               |
| CID011667893 | Antineoplastic                               |
| CID011689883 | Cardiotonic                                  |
| CID011722448 | Antiparkinsonian                             |
| CID011958180 | Antithrombotic                               |
| CID011960528 | Antineoplastic                               |
| CID011964344 | Antiviral, Antineoplastic, Immunomodulator   |
| CID012849515 | Antihypertensive                             |
| CID012940550 | Analgesic                                    |

|              |                  |
|--------------|------------------|
| CID012962084 | Antihypertensive |
| CID013041183 | Antihypertensive |
| CID013044278 | Antihypertensive |
| CID013105142 | Antidiabetic     |
| CID013105693 | Antihypertensive |
| CID013773304 | Antihypertensive |
| CID013773531 | Antiinflammatory |
| CID013995788 | Analgesic        |
| CID014096625 | Antipsychotic    |
| CID014130503 | Antihypertensive |
| CID014478256 | Antihypertensive |
| CID014842904 | Antiulcerative   |
| CID014958952 | Antipsychotic    |
| CID015224271 | Antifungal       |
| CID015342071 | Antidepressant   |
| CID015573150 | Analgesic        |
| CID015574853 | Antineoplastic   |
| CID016129681 | Antiulcerative   |
| CID016220188 | Antiinflammatory |
| CID016684927 | Pharmaceutic aid |
| CID016760627 | Antineoplastic   |
| CID017754772 | Antineoplastic   |

|              |                                       |
|--------------|---------------------------------------|
| CID018177392 | Hypolipidemic                         |
| CID018350668 | Antineoplastic                        |
| CID018426762 | Antiinflammatory                      |
| CID018767415 | Antiinflammatory                      |
| CID019385000 | Antiobesity                           |
| CID019609133 | Antithrombotic                        |
| CID019609831 | Antineoplastic                        |
| CID019695974 | Antihypertensive                      |
| CID020516612 | Antineoplastic, Narcotic antagonist   |
| CID020725583 | Antihypertensive                      |
| CID020734893 | Antiallergic/Antiasthmatic            |
| CID021071928 | Antidepressant                        |
| CID021264541 | Analgesic, Antiallergic/Antiasthmatic |
| CID021336308 | Antiviral                             |
| CID021584396 | Antibacterial, Antibiotic             |
| CID021634109 | Anticonvulsant                        |
| CID021696352 | Antiviral                             |
| CID021715924 | Antihypertensive                      |
| CID021851774 | Analgesic                             |
| CID021851902 | Anti-Alzheimer's Disease              |
| CID021851988 | Anxiolytic                            |
| CID021864479 | Antiarrhythmic                        |

|              |                               |
|--------------|-------------------------------|
| CID021864628 | Antithrombotic                |
| CID021865524 | Antihypertensive, Cardiotonic |
| CID021865526 | Antihypertensive              |
| CID021865528 | Antithrombotic                |
| CID021867770 | Antineoplastic                |
| CID021874004 | Antineoplastic                |
| CID021874557 | Antiparkinsonian              |
| CID021881641 | Antibiotic                    |
| CID021889836 | Antiviral                     |
| CID021896638 | Antithrombotic                |
| CID021896713 | Antihypertensive              |
| CID021902176 | Antihypertensive              |
| CID021905905 | Antidepressant                |
| CID021910730 | Antifungal                    |
| CID022058234 | Antineoplastic                |
| CID022175537 | Hypocholesterolemic           |
| CID022262705 | Antiobesity                   |
| CID022267137 | Antiinflammatory, Antioxidant |
| CID022451303 | Vasodilator                   |
| CID022506569 | Antidiabetic, Antiobesity     |
| CID022570509 | Antiviral                     |
| CID022665435 | Antidiabetic                  |

|              |                            |
|--------------|----------------------------|
| CID022671105 | Antineoplastic             |
| CID022896913 | Radioactive agent          |
| CID023145858 | Antineoplastic             |
| CID023287809 | Antiallergic/Antiasthmatic |
| CID023392970 | Antineoplastic             |
| CID023400030 | Antiobesity                |
| CID023424116 | Antibacterial, Antibiotic  |
| CID023526785 | Immunomodulator            |
| CID023545473 | Antiviral                  |
| CID023560495 | Antidiabetic               |
| CID023594367 | Antiviral                  |
| CID024748573 | Antineoplastic             |
| CID024776445 | Antineoplastic             |
| CID024826799 | Antineoplastic             |
| CID024889392 | Antineoplastic             |
| CID025059310 | Antineoplastic             |
| CID044208978 | Antineoplastic             |
| CID044210114 | Antipsychotic              |
| CID049849451 | Antiatherosclerotic        |
| CID053394043 | Vasodilator                |
| CID053394056 | Antihypertensive           |
| CID053394153 | Antiallergic/Antiasthmatic |

|              |                                |
|--------------|--------------------------------|
| CID053394208 | Antihypertensive, Antiglaucoma |
| CID053395233 | Antibacterial, Antibiotic      |
| CID053396328 | Antineoplastic                 |
| CID053398664 | Antibacterial                  |
| CID053398674 | Immunomodulator                |
| CID053398697 | Antineoplastic                 |
| CID053400847 | Antidiabetic                   |
| CID053437714 | Antineoplastic                 |
| CID053445376 | Antineoplastic                 |
| CID054278504 | Cognition enhancer             |
| CID054359967 | Antidiabetic                   |
| CID054574836 | Antisecretory (gastric)        |
| CID054676038 | Antithrombotic                 |
| CID054676228 | Antiinflammatory               |
| CID054676814 | Antiviral                      |
| CID054676860 | Antioxidant                    |
| CID054677470 | Antiinflammatory               |
| CID054678486 | Antithrombotic, Anticonvulsant |
| CID054678491 | Antibacterial, Antibiotic      |
| CID054685524 | Antithrombotic                 |
| CID056669849 | Antidiabetic                   |
