# Supplementary material for: Prediction of Drug Indications Based on Chemical Interactions and Chemical Similarities
Source: Hindawi journal article supplement (doi:10.1155/2015/584546), 2015-01-01
Supplement: f1 [file 584546.f1.zip]

**Supplementary Material IV.** The performance of the method based on chemical similarities, where similarity scores were computed based on 8 types of fingerprints and *k* was set to 1, 2, ..., 15, 1732.

(1) Similarity scores with fingerprint ECFP\_2

| Order | k=1    | k=2    | k=3    | k=4    | k=5    | k=6    | k=7    | k=8    | k=9    | k=10   | k=11   | k=12   | k=13   | k=14   | k=15   | k=1732 |
|-------|--------|--------|--------|--------|--------|--------|--------|--------|--------|--------|--------|--------|--------|--------|--------|--------|
| 1     | 45.01% | 48.47% | 48.70% | 48.12% | 47.55% | 46.22% | 45.82% | 45.41% | 44.89% | 44.32% | 43.22% | 42.47% | 41.95% | 41.43% | 41.26% | 13.10% |
| 2     | 19.97% | 18.87% | 18.70% | 18.64% | 18.70% | 19.45% | 19.27% | 19.27% | 18.81% | 18.93% | 19.16% | 18.87% | 18.35% | 18.18% | 17.71% | 16.68% |
| 3     | 8.48%  | 7.39%  | 7.85%  | 8.31%  | 8.71%  | 9.00%  | 8.42%  | 8.08%  | 8.42%  | 7.91%  | 7.85%  | 8.19%  | 8.71%  | 7.91%  | 8.02%  | 7.56%  |
| 4     | 4.79%  | 5.83%  | 6.00%  | 5.71%  | 5.31%  | 5.14%  | 6.12%  | 6.29%  | 6.23%  | 6.35%  | 6.46%  | 6.23%  | 5.77%  | 6.58%  | 6.52%  | 9.92%  |
| 5     | 4.50%  | 4.96%  | 4.67%  | 5.71%  | 5.48%  | 4.85%  | 4.39%  | 4.04%  | 3.75%  | 3.87%  | 4.56%  | 4.56%  | 4.33%  | 4.15%  | 4.04%  | 5.37%  |
| 6     | 4.56%  | 3.40%  | 3.81%  | 3.12%  | 3.92%  | 4.15%  | 3.69%  | 3.81%  | 3.87%  | 4.33%  | 3.92%  | 3.98%  | 4.56%  | 5.14%  | 5.08%  | 4.21%  |
| 7     | 3.64%  | 3.40%  | 2.94%  | 2.54%  | 2.60%  | 2.94%  | 3.75%  | 3.69%  | 4.10%  | 3.52%  | 3.29%  | 3.58%  | 3.52%  | 3.12%  | 3.35%  | 4.15%  |
| 8     | 1.90%  | 3.12%  | 2.77%  | 3.29%  | 2.89%  | 2.77%  | 2.60%  | 2.71%  | 2.37%  | 2.65%  | 3.17%  | 3.06%  | 2.60%  | 3.06%  | 2.89%  | 3.35%  |
| 9     | 2.37%  | 2.48%  | 2.37%  | 2.31%  | 1.90%  | 2.25%  | 2.19%  | 2.19%  | 2.60%  | 2.42%  | 2.25%  | 2.19%  | 2.25%  | 2.19%  | 2.71%  | 4.33%  |
| 10    | 2.19%  | 2.02%  | 2.25%  | 1.79%  | 2.08%  | 1.67%  | 2.02%  | 2.37%  | 1.96%  | 2.19%  | 2.02%  | 2.48%  | 2.25%  | 2.31%  | 1.79%  | 2.89%  |

|    |       |       |       |       |       |       |       |       |       |       |       |       |       |       |       |       |
|----|-------|-------|-------|-------|-------|-------|-------|-------|-------|-------|-------|-------|-------|-------|-------|-------|
| 11 | 2.14% | 1.27% | 1.50% | 2.02% | 2.25% | 2.37% | 1.79% | 1.79% | 1.85% | 1.56% | 1.85% | 1.62% | 2.08% | 1.79% | 1.96% | 5.48% |
| 12 | 1.79% | 1.67% | 1.85% | 1.44% | 1.67% | 1.44% | 1.44% | 1.56% | 2.14% | 2.31% | 2.02% | 2.08% | 1.96% | 1.67% | 1.67% | 4.39% |
| 13 | 1.56% | 0.98% | 1.21% | 1.38% | 1.15% | 1.50% | 1.96% | 2.25% | 1.56% | 1.67% | 1.62% | 1.44% | 1.90% | 2.14% | 2.08% | 4.21% |
| 14 | 1.50% | 1.21% | 0.98% | 1.38% | 1.62% | 1.56% | 1.90% | 1.73% | 2.14% | 2.08% | 1.96% | 1.90% | 1.90% | 1.56% | 1.50% | 2.19% |
| 15 | 1.38% | 1.85% | 1.33% | 1.50% | 1.56% | 1.79% | 1.38% | 1.44% | 1.15% | 0.92% | 1.21% | 1.27% | 1.27% | 1.10% | 1.10% | 2.08% |
| 16 | 0.81% | 1.15% | 1.62% | 1.21% | 1.38% | 1.44% | 1.10% | 0.58% | 1.15% | 1.38% | 1.10% | 1.10% | 1.21% | 1.38% | 1.44% | 1.79% |
| 17 | 1.10% | 1.33% | 0.92% | 1.15% | 1.10% | 0.98% | 1.04% | 1.33% | 0.81% | 0.63% | 0.81% | 0.98% | 0.92% | 1.15% | 1.15% | 1.96% |
| 18 | 1.44% | 0.75% | 0.81% | 1.27% | 1.21% | 0.81% | 1.10% | 0.75% | 0.52% | 0.69% | 0.81% | 0.92% | 0.98% | 1.27% | 1.15% | 2.60% |
| 19 | 1.21% | 0.92% | 1.33% | 0.98% | 0.69% | 0.81% | 0.52% | 0.87% | 0.98% | 0.92% | 1.04% | 0.98% | 0.92% | 0.69% | 0.75% | 2.25% |
| 20 | 0.92% | 0.75% | 0.87% | 0.81% | 0.69% | 0.63% | 0.81% | 0.87% | 1.33% | 1.21% | 1.10% | 0.58% | 0.35% | 0.87% | 0.98% | 2.02% |
| 21 | 0.69% | 1.04% | 0.75% | 0.63% | 0.69% | 0.87% | 0.98% | 0.81% | 0.87% | 0.81% | 0.92% | 1.10% | 1.04% | 0.75% | 0.98% | 1.67% |
| 22 | 1.21% | 0.75% | 0.75% | 0.52% | 0.63% | 0.98% | 0.75% | 1.15% | 0.92% | 0.92% | 0.81% | 0.69% | 1.27% | 1.15% | 1.10% | 1.27% |
| 23 | 0.81% | 0.69% | 0.69% | 0.35% | 0.46% | 0.92% | 0.75% | 0.63% | 0.58% | 0.63% | 0.69% | 0.87% | 0.81% | 0.98% | 0.75% | 1.85% |

|    |       |       |       |       |       |       |       |       |       |       |       |       |       |       |       |       |
|----|-------|-------|-------|-------|-------|-------|-------|-------|-------|-------|-------|-------|-------|-------|-------|-------|
| 24 | 0.52% | 0.63% | 0.35% | 0.63% | 0.46% | 0.52% | 0.87% | 0.69% | 0.81% | 0.81% | 0.35% | 0.69% | 0.58% | 0.58% | 0.63% | 1.38% |
| 25 | 0.63% | 1.04% | 0.52% | 0.81% | 0.63% | 0.69% | 0.92% | 0.63% | 1.04% | 0.75% | 0.98% | 0.81% | 0.23% | 0.46% | 0.40% | 1.27% |
| 26 | 0.87% | 0.69% | 0.92% | 0.46% | 0.98% | 0.46% | 0.58% | 0.69% | 0.52% | 0.69% | 0.87% | 0.75% | 0.69% | 0.40% | 0.69% | 0.92% |
| 27 | 0.69% | 0.52% | 0.58% | 0.35% | 0.52% | 0.63% | 0.58% | 0.63% | 0.75% | 0.81% | 0.87% | 0.58% | 0.69% | 0.63% | 0.63% | 1.04% |
| 28 | 0.35% | 0.69% | 0.46% | 0.92% | 0.81% | 0.63% | 0.69% | 0.58% | 0.35% | 0.35% | 0.52% | 0.75% | 0.69% | 0.63% | 0.75% | 0.87% |
| 29 | 0.58% | 0.29% | 0.75% | 0.98% | 0.63% | 0.52% | 0.35% | 0.87% | 0.52% | 0.75% | 1.10% | 1.10% | 1.21% | 1.04% | 0.75% | 1.15% |
| 30 | 0.63% | 0.52% | 0.63% | 0.58% | 0.40% | 0.46% | 0.40% | 0.35% | 0.75% | 0.98% | 0.46% | 0.92% | 1.04% | 0.69% | 0.69% | 1.10% |
| 31 | 0.40% | 0.46% | 0.58% | 0.52% | 0.52% | 0.52% | 0.46% | 0.52% | 0.52% | 0.69% | 0.63% | 0.40% | 0.40% | 0.69% | 1.04% | 0.75% |
| 32 | 0.92% | 0.40% | 0.75% | 0.69% | 0.58% | 0.58% | 0.63% | 0.23% | 0.40% | 0.29% | 0.63% | 0.69% | 0.81% | 1.15% | 0.98% | 0.75% |
| 33 | 0.75% | 0.75% | 0.69% | 0.63% | 0.63% | 0.35% | 0.35% | 0.52% | 0.75% | 0.75% | 0.58% | 0.81% | 0.87% | 0.63% | 0.46% | 1.62% |
| 34 | 0.29% | 0.81% | 0.58% | 0.40% | 0.29% | 0.46% | 0.69% | 0.98% | 0.87% | 0.58% | 0.58% | 0.63% | 0.40% | 0.69% | 0.75% | 0.98% |
| 35 | 0.46% | 0.52% | 0.46% | 0.52% | 0.58% | 0.52% | 0.40% | 0.46% | 0.29% | 0.58% | 0.58% | 0.29% | 0.52% | 0.52% | 0.58% | 0.75% |
| 36 | 0.40% | 0.23% | 0.35% | 0.40% | 0.46% | 0.35% | 0.69% | 0.52% | 0.35% | 0.35% | 0.46% | 0.40% | 0.69% | 0.52% | 0.46% | 0.98% |

|    |       |       |       |       |       |       |       |       |       |       |       |       |       |       |       |       |
|----|-------|-------|-------|-------|-------|-------|-------|-------|-------|-------|-------|-------|-------|-------|-------|-------|
| 37 | 0.35% | 0.46% | 0.29% | 0.35% | 0.52% | 0.69% | 0.52% | 0.52% | 0.29% | 0.40% | 0.46% | 0.35% | 0.69% | 0.40% | 0.92% | 0.75% |
| 38 | 0.29% | 0.63% | 0.23% | 0.29% | 0.40% | 0.58% | 0.29% | 0.52% | 0.52% | 0.58% | 0.46% | 0.69% | 0.58% | 1.04% | 0.69% | 0.58% |
| 39 | 0.23% | 0.17% | 0.35% | 0.63% | 0.40% | 0.46% | 0.35% | 0.17% | 0.40% | 0.29% | 0.75% | 0.63% | 0.58% | 0.87% | 0.87% | 0.69% |
| 40 | 0.52% | 0.35% | 0.35% | 0.17% | 0.29% | 0.40% | 0.17% | 0.17% | 0.35% | 0.69% | 0.52% | 0.52% | 0.46% | 0.40% | 0.69% | 0.69% |
| 41 | 0.69% | 0.17% | 0.58% | 0.40% | 0.58% | 0.23% | 0.46% | 0.29% | 0.52% | 0.52% | 0.46% | 0.58% | 0.63% | 0.58% | 0.40% | 0.46% |
| 42 | 0.75% | 0.17% | 0.17% | 0.29% | 0.23% | 0.35% | 0.46% | 0.52% | 0.46% | 0.40% | 0.29% | 0.52% | 0.29% | 0.46% | 0.63% | 0.87% |
| 43 | 0.23% | 0.35% | 0.17% | 0.23% | 0.35% | 0.52% | 0.52% | 0.69% | 0.52% | 0.52% | 0.69% | 0.75% | 0.81% | 0.69% | 0.69% | 0.75% |
| 44 | 0.40% | 0.29% | 0.17% | 0.12% | 0.35% | 0.46% | 0.87% | 0.63% | 0.40% | 0.52% | 0.23% | 0.35% | 0.63% | 0.69% | 0.40% | 0.58% |
| 45 | 0.00% | 0.29% | 0.35% | 0.52% | 0.35% | 0.17% | 0.35% | 0.29% | 0.52% | 0.23% | 0.46% | 0.23% | 0.29% | 0.52% | 0.69% | 0.58% |
| 46 | 0.17% | 0.40% | 0.46% | 0.35% | 0.52% | 0.52% | 0.17% | 0.17% | 0.40% | 0.52% | 0.46% | 0.46% | 0.40% | 0.17% | 0.29% | 0.23% |
| 47 | 0.46% | 0.35% | 0.52% | 0.46% | 0.12% | 0.35% | 0.35% | 0.52% | 0.23% | 0.29% | 0.29% | 0.35% | 0.23% | 0.29% | 0.23% | 0.35% |
| 48 | 0.23% | 0.35% | 0.23% | 0.35% | 0.23% | 0.17% | 0.23% | 0.29% | 0.12% | 0.23% | 0.23% | 0.52% | 0.17% | 0.23% | 0.23% | 0.29% |
| 49 | 0.29% | 0.46% | 0.35% | 0.23% | 0.52% | 0.40% | 0.35% | 0.35% | 0.58% | 0.46% | 0.46% | 0.17% | 0.58% | 0.40% | 0.52% | 0.35% |

|    |       |       |       |       |       |       |       |       |       |       |       |       |       |       |       |       |
|----|-------|-------|-------|-------|-------|-------|-------|-------|-------|-------|-------|-------|-------|-------|-------|-------|
| 50 | 0.52% | 0.35% | 0.23% | 0.29% | 0.23% | 0.29% | 0.35% | 0.40% | 0.52% | 0.46% | 0.29% | 0.23% | 0.23% | 0.46% | 0.40% | 0.46% |
| 51 | 0.46% | 0.40% | 0.46% | 0.40% | 0.35% | 0.29% | 0.17% | 0.29% | 0.29% | 0.40% | 0.52% | 0.52% | 0.63% | 0.46% | 0.40% | 0.40% |
| 52 | 0.23% | 0.35% | 0.35% | 0.29% | 0.29% | 0.23% | 0.40% | 0.23% | 0.29% | 0.17% | 0.23% | 0.46% | 0.35% | 0.40% | 0.40% | 0.35% |
| 53 | 0.12% | 0.23% | 0.23% | 0.29% | 0.23% | 0.35% | 0.23% | 0.29% | 0.35% | 0.23% | 0.17% | 0.17% | 0.17% | 0.17% | 0.17% | 0.23% |
| 54 | 0.46% | 0.29% | 0.29% | 0.35% | 0.29% | 0.23% | 0.23% | 0.23% | 0.23% | 0.29% | 0.46% | 0.35% | 0.35% | 0.35% | 0.35% | 0.35% |
| 55 | 0.23% | 0.29% | 0.23% | 0.17% | 0.29% | 0.40% | 0.46% | 0.46% | 0.29% | 0.35% | 0.17% | 0.23% | 0.17% | 0.17% | 0.17% | 0.17% |
| 56 | 0.23% | 0.12% | 0.06% | 0.06% | 0.06% | 0.00% | 0.00% | 0.00% | 0.17% | 0.17% | 0.29% | 0.29% | 0.35% | 0.35% | 0.35% | 0.35% |

(2) Similarity scores with fingerprint ECFP\_4

| Order | k=1    | k=2    | k=3    | k=4    | k=5    | k=6    | k=7    | k=8    | k=9    | k=10   | k=11   | k=12   | k=13   | k=14   | k=15   | k=1732 |
|-------|--------|--------|--------|--------|--------|--------|--------|--------|--------|--------|--------|--------|--------|--------|--------|--------|
| 1     | 46.16% | 49.39% | 49.34% | 49.22% | 49.22% | 48.47% | 47.43% | 46.91% | 46.57% | 45.99% | 45.99% | 45.59% | 44.89% | 44.37% | 43.97% | 16.27% |
| 2     | 19.85% | 18.52% | 18.58% | 18.98% | 18.64% | 18.93% | 19.85% | 19.91% | 19.56% | 19.27% | 18.06% | 17.89% | 17.95% | 18.12% | 17.77% | 15.18% |
| 3     | 8.37%  | 7.91%  | 8.94%  | 8.60%  | 8.89%  | 8.77%  | 8.54%  | 8.08%  | 8.60%  | 8.94%  | 8.83%  | 8.60%  | 9.00%  | 8.71%  | 8.89%  | 7.79%  |
| 4     | 4.96%  | 5.71%  | 5.31%  | 4.79%  | 4.62%  | 4.96%  | 5.31%  | 6.17%  | 5.77%  | 5.71%  | 5.89%  | 6.23%  | 5.71%  | 5.60%  | 5.25%  | 8.94%  |

|    |       |       |       |       |       |       |       |       |       |       |       |       |       |       |       |       |
|----|-------|-------|-------|-------|-------|-------|-------|-------|-------|-------|-------|-------|-------|-------|-------|-------|
| 5  | 4.15% | 3.52% | 4.04% | 4.85% | 4.67% | 4.50% | 4.15% | 3.98% | 3.92% | 3.58% | 4.10% | 3.87% | 4.21% | 4.27% | 4.67% | 6.35% |
| 6  | 3.58% | 4.33% | 3.87% | 3.81% | 4.10% | 3.64% | 3.75% | 3.29% | 3.81% | 4.04% | 4.15% | 4.39% | 3.98% | 4.21% | 3.87% | 5.08% |
| 7  | 3.40% | 3.40% | 2.42% | 2.89% | 2.71% | 3.00% | 3.00% | 3.58% | 3.58% | 3.75% | 3.81% | 3.12% | 3.40% | 3.46% | 3.81% | 2.77% |
| 8  | 1.90% | 1.79% | 2.54% | 2.48% | 2.37% | 2.77% | 2.71% | 2.65% | 2.60% | 2.89% | 2.54% | 3.06% | 2.89% | 2.77% | 2.48% | 3.12% |
| 9  | 2.37% | 1.96% | 2.37% | 2.37% | 2.60% | 2.71% | 2.94% | 2.48% | 2.48% | 1.90% | 2.25% | 1.96% | 2.25% | 1.67% | 1.90% | 4.21% |
| 10 | 2.25% | 2.14% | 2.19% | 2.19% | 2.02% | 1.79% | 1.62% | 1.90% | 1.62% | 1.90% | 1.67% | 2.25% | 1.79% | 2.08% | 1.79% | 3.06% |
| 11 | 1.04% | 2.08% | 2.25% | 1.79% | 1.85% | 1.50% | 1.67% | 1.38% | 1.73% | 1.67% | 1.79% | 1.96% | 2.19% | 2.25% | 2.37% | 6.29% |
| 12 | 2.08% | 1.79% | 1.27% | 0.87% | 1.10% | 0.69% | 1.15% | 1.73% | 1.50% | 2.08% | 2.25% | 2.31% | 2.14% | 2.14% | 1.62% | 4.79% |
| 13 | 1.44% | 1.27% | 1.67% | 1.67% | 1.44% | 2.08% | 1.50% | 1.62% | 1.62% | 1.04% | 1.15% | 0.92% | 1.38% | 1.44% | 1.79% | 3.29% |
| 14 | 1.56% | 1.27% | 1.04% | 1.33% | 1.67% | 1.79% | 1.50% | 1.62% | 0.92% | 1.27% | 1.04% | 0.98% | 0.92% | 1.27% | 1.44% | 2.02% |
| 15 | 2.14% | 0.98% | 1.38% | 1.50% | 1.15% | 1.62% | 1.50% | 1.21% | 1.56% | 1.33% | 1.15% | 1.38% | 1.62% | 1.33% | 1.62% | 2.65% |
| 16 | 1.50% | 1.56% | 1.15% | 1.10% | 1.50% | 0.98% | 1.27% | 1.38% | 1.44% | 1.50% | 1.73% | 1.27% | 0.92% | 1.38% | 1.33% | 1.85% |
| 17 | 0.81% | 0.92% | 1.04% | 1.21% | 1.04% | 1.04% | 1.04% | 0.75% | 1.15% | 1.15% | 1.33% | 1.33% | 1.21% | 1.10% | 1.21% | 2.25% |

|    |       |       |       |       |       |       |       |       |       |       |       |       |       |       |       |       |
|----|-------|-------|-------|-------|-------|-------|-------|-------|-------|-------|-------|-------|-------|-------|-------|-------|
| 18 | 0.92% | 1.04% | 0.92% | 0.92% | 0.98% | 0.98% | 1.62% | 1.04% | 1.44% | 1.10% | 0.87% | 1.10% | 1.21% | 1.15% | 1.21% | 2.14% |
| 19 | 0.81% | 0.81% | 1.04% | 0.92% | 1.21% | 1.04% | 0.63% | 0.92% | 0.63% | 0.87% | 0.87% | 0.98% | 0.63% | 0.69% | 0.52% | 2.31% |
| 20 | 1.10% | 0.98% | 0.52% | 1.04% | 0.69% | 0.98% | 0.63% | 0.75% | 0.63% | 0.75% | 1.15% | 0.58% | 0.87% | 0.87% | 1.04% | 1.67% |
| 21 | 0.92% | 1.27% | 0.63% | 0.52% | 0.35% | 0.63% | 0.63% | 0.69% | 0.63% | 0.81% | 0.69% | 0.92% | 0.98% | 0.98% | 0.81% | 1.21% |
| 22 | 0.92% | 0.75% | 0.81% | 0.81% | 0.58% | 0.35% | 0.81% | 0.81% | 0.63% | 0.58% | 0.46% | 0.52% | 0.81% | 0.92% | 0.98% | 1.33% |
| 23 | 0.92% | 0.98% | 0.63% | 0.58% | 0.81% | 1.04% | 0.63% | 0.63% | 0.63% | 0.87% | 1.10% | 1.15% | 1.10% | 0.63% | 0.87% | 1.67% |
| 24 | 0.87% | 0.75% | 1.04% | 0.52% | 0.92% | 0.58% | 0.46% | 0.58% | 0.98% | 0.75% | 0.63% | 0.75% | 0.69% | 0.75% | 0.69% | 1.96% |
| 25 | 0.69% | 0.46% | 0.52% | 0.92% | 0.52% | 0.58% | 0.52% | 0.69% | 0.69% | 0.58% | 0.69% | 0.81% | 0.29% | 0.46% | 0.46% | 0.98% |
| 26 | 0.92% | 0.63% | 0.58% | 0.17% | 0.35% | 0.40% | 0.75% | 0.81% | 0.63% | 0.75% | 0.58% | 0.69% | 0.92% | 0.63% | 0.40% | 1.04% |
| 27 | 0.92% | 0.52% | 0.75% | 0.81% | 0.87% | 0.98% | 0.81% | 0.75% | 0.69% | 0.75% | 0.58% | 0.40% | 0.40% | 0.63% | 0.52% | 0.81% |
| 28 | 0.23% | 0.58% | 0.87% | 0.69% | 0.75% | 0.29% | 0.63% | 0.69% | 0.58% | 0.69% | 0.75% | 0.75% | 0.75% | 0.69% | 0.81% | 1.10% |
| 29 | 0.87% | 0.92% | 0.63% | 0.87% | 0.58% | 0.87% | 0.46% | 0.35% | 0.35% | 0.46% | 0.63% | 0.75% | 0.46% | 0.75% | 0.46% | 1.04% |
| 30 | 0.52% | 0.58% | 0.81% | 0.23% | 0.40% | 0.52% | 0.69% | 0.75% | 0.69% | 0.46% | 0.58% | 0.58% | 0.98% | 0.46% | 0.75% | 1.04% |

|    |       |       |       |       |       |       |       |       |       |       |       |       |       |       |       |       |
|----|-------|-------|-------|-------|-------|-------|-------|-------|-------|-------|-------|-------|-------|-------|-------|-------|
| 31 | 0.40% | 0.46% | 0.46% | 0.63% | 0.69% | 0.58% | 0.52% | 0.63% | 0.75% | 0.52% | 0.46% | 0.52% | 0.81% | 0.98% | 0.58% | 0.52% |
| 32 | 0.40% | 0.46% | 0.46% | 0.81% | 0.69% | 0.46% | 0.63% | 0.63% | 0.40% | 0.58% | 0.63% | 0.46% | 0.81% | 0.81% | 1.04% | 0.69% |
| 33 | 0.81% | 0.63% | 0.35% | 0.81% | 0.46% | 0.81% | 0.69% | 0.46% | 0.52% | 0.63% | 0.63% | 0.63% | 0.52% | 0.75% | 1.04% | 1.04% |
| 34 | 0.63% | 0.58% | 0.35% | 0.29% | 0.29% | 0.29% | 0.17% | 0.29% | 0.46% | 0.58% | 0.63% | 0.92% | 0.40% | 0.40% | 0.40% | 0.87% |
| 35 | 0.46% | 0.46% | 0.87% | 0.23% | 0.52% | 0.46% | 0.81% | 0.75% | 0.46% | 0.69% | 0.58% | 0.40% | 0.35% | 0.58% | 0.87% | 1.27% |
| 36 | 0.75% | 0.12% | 0.29% | 0.52% | 0.52% | 0.81% | 0.69% | 0.63% | 0.75% | 0.46% | 0.52% | 0.46% | 0.40% | 0.52% | 0.46% | 0.63% |
| 37 | 0.29% | 0.52% | 0.35% | 0.63% | 0.75% | 0.46% | 0.40% | 0.46% | 0.46% | 0.23% | 0.23% | 0.12% | 0.63% | 0.81% | 0.69% | 0.87% |
| 38 | 0.46% | 0.29% | 0.75% | 0.40% | 0.40% | 0.35% | 0.46% | 0.52% | 0.69% | 0.35% | 0.52% | 0.46% | 0.75% | 0.40% | 0.75% | 0.81% |
| 39 | 0.35% | 0.46% | 0.17% | 0.17% | 0.17% | 0.40% | 0.23% | 0.17% | 0.29% | 0.46% | 0.35% | 0.87% | 0.52% | 0.63% | 0.52% | 0.63% |
| 40 | 0.12% | 0.35% | 0.23% | 0.35% | 0.35% | 0.23% | 0.23% | 0.46% | 0.29% | 0.69% | 0.58% | 0.40% | 0.69% | 0.75% | 0.58% | 0.63% |
| 41 | 0.40% | 0.35% | 0.35% | 0.29% | 0.40% | 0.12% | 0.23% | 0.29% | 0.52% | 0.63% | 0.46% | 0.75% | 0.46% | 0.40% | 0.46% | 0.46% |
| 42 | 0.40% | 0.52% | 0.12% | 0.40% | 0.17% | 0.29% | 0.58% | 0.46% | 0.29% | 0.40% | 0.46% | 0.35% | 0.17% | 0.40% | 0.52% | 0.69% |
| 43 | 0.58% | 0.35% | 0.63% | 0.29% | 0.23% | 0.63% | 0.46% | 0.40% | 0.46% | 0.40% | 0.69% | 0.40% | 0.40% | 0.29% | 0.40% | 0.29% |



|    |       |       |       |       |       |       |       |       |       |       |       |       |       |       |       |       |
|----|-------|-------|-------|-------|-------|-------|-------|-------|-------|-------|-------|-------|-------|-------|-------|-------|
| 44 | 0.40% | 0.40% | 0.40% | 0.63% | 0.98% | 0.58% | 0.40% | 0.46% | 0.40% | 0.46% | 0.40% | 0.46% | 0.58% | 0.35% | 0.46% | 0.29% |
| 45 | 0.12% | 0.40% | 0.29% | 0.40% | 0.29% | 0.52% | 0.46% | 0.46% | 0.63% | 0.40% | 0.23% | 0.40% | 0.52% | 0.69% | 0.46% | 0.63% |
| 46 | 0.52% | 0.52% | 0.52% | 0.35% | 0.29% | 0.29% | 0.58% | 0.35% | 0.29% | 0.46% | 0.46% | 0.46% | 0.23% | 0.46% | 0.52% | 0.58% |
| 47 | 0.58% | 0.12% | 0.23% | 0.29% | 0.35% | 0.29% | 0.29% | 0.00% | 0.35% | 0.40% | 0.46% | 0.35% | 0.52% | 0.40% | 0.35% | 0.35% |
| 48 | 0.29% | 0.29% | 0.35% | 0.23% | 0.23% | 0.35% | 0.29% | 0.63% | 0.40% | 0.17% | 0.35% | 0.52% | 0.46% | 0.35% | 0.46% | 0.40% |
| 49 | 0.17% | 0.35% | 0.17% | 0.17% | 0.12% | 0.12% | 0.23% | 0.58% | 0.35% | 0.35% | 0.23% | 0.17% | 0.40% | 0.46% | 0.35% | 0.29% |
| 50 | 0.23% | 0.52% | 0.35% | 0.23% | 0.17% | 0.35% | 0.35% | 0.23% | 0.40% | 0.23% | 0.23% | 0.29% | 0.35% | 0.35% | 0.40% | 0.46% |
| 51 | 0.58% | 0.12% | 0.17% | 0.29% | 0.29% | 0.35% | 0.23% | 0.12% | 0.35% | 0.63% | 0.58% | 0.46% | 0.46% | 0.40% | 0.40% | 0.35% |
| 52 | 0.17% | 0.35% | 0.46% | 0.35% | 0.35% | 0.17% | 0.17% | 0.29% | 0.17% | 0.17% | 0.29% | 0.40% | 0.35% | 0.35% | 0.35% | 0.40% |
| 53 | 0.35% | 0.29% | 0.17% | 0.35% | 0.46% | 0.29% | 0.40% | 0.35% | 0.29% | 0.23% | 0.35% | 0.29% | 0.29% | 0.29% | 0.29% | 0.29% |
| 54 | 0.23% | 0.23% | 0.23% | 0.23% | 0.17% | 0.23% | 0.06% | 0.12% | 0.23% | 0.23% | 0.23% | 0.23% | 0.23% | 0.23% | 0.23% | 0.23% |
| 55 | 0.29% | 0.29% | 0.35% | 0.29% | 0.35% | 0.40% | 0.52% | 0.40% | 0.29% | 0.35% | 0.23% | 0.17% | 0.17% | 0.17% | 0.17% | 0.17% |
| 56 | 0.17% | 0.12% | 0.12% | 0.06% | 0.06% | 0.06% | 0.00% | 0.06% | 0.17% | 0.17% | 0.23% | 0.29% | 0.29% | 0.29% | 0.29% | 0.29% |

(3) Similarity scores with fingerprint ECFP<sub>6</sub>

| Order | k=1    | k=2    | k=3    | k=4    | k=5    | k=6    | k=7    | k=8    | k=9    | k=10   | k=11   | k=12   | k=13   | k=14   | k=15   | k=1732 |
|-------|--------|--------|--------|--------|--------|--------|--------|--------|--------|--------|--------|--------|--------|--------|--------|--------|
| 1     | 45.82% | 48.87% | 48.87% | 49.05% | 49.11% | 48.76% | 48.24% | 47.09% | 46.86% | 46.57% | 46.45% | 45.93% | 45.35% | 44.78% | 44.26% | 17.14% |
| 2     | 19.27% | 18.98% | 19.62% | 19.33% | 18.75% | 18.93% | 18.93% | 19.97% | 19.73% | 19.16% | 18.64% | 18.12% | 18.06% | 17.54% | 17.54% | 15.06% |
| 3     | 9.35%  | 7.96%  | 8.08%  | 8.02%  | 8.25%  | 8.31%  | 8.60%  | 8.54%  | 8.89%  | 8.83%  | 8.37%  | 9.12%  | 8.89%  | 9.12%  | 9.06%  | 7.73%  |
| 4     | 4.85%  | 5.14%  | 5.42%  | 5.71%  | 5.42%  | 5.08%  | 4.96%  | 5.02%  | 4.73%  | 5.19%  | 5.37%  | 5.02%  | 5.25%  | 5.77%  | 6.06%  | 8.71%  |
| 5     | 4.04%  | 3.87%  | 4.67%  | 4.67%  | 4.90%  | 4.73%  | 4.50%  | 4.27%  | 4.50%  | 4.21%  | 4.50%  | 4.44%  | 4.39%  | 4.10%  | 3.98%  | 6.41%  |
| 6     | 3.06%  | 3.98%  | 2.77%  | 3.23%  | 3.12%  | 3.40%  | 3.52%  | 3.40%  | 3.17%  | 3.81%  | 4.04%  | 4.10%  | 4.15%  | 4.39%  | 4.15%  | 5.14%  |
| 7     | 2.65%  | 2.31%  | 3.06%  | 2.42%  | 2.77%  | 2.60%  | 3.06%  | 3.75%  | 3.87%  | 3.46%  | 3.75%  | 3.87%  | 4.39%  | 4.10%  | 4.04%  | 3.06%  |
| 8     | 2.31%  | 2.83%  | 2.42%  | 2.25%  | 2.77%  | 3.40%  | 3.40%  | 2.94%  | 3.23%  | 3.06%  | 2.71%  | 3.12%  | 2.71%  | 2.77%  | 3.06%  | 2.60%  |
| 9     | 3.06%  | 2.42%  | 2.37%  | 2.60%  | 2.65%  | 2.08%  | 2.65%  | 2.48%  | 1.79%  | 2.19%  | 2.25%  | 2.19%  | 1.90%  | 1.96%  | 1.67%  | 4.44%  |
| 10    | 1.73%  | 1.96%  | 2.14%  | 2.25%  | 2.31%  | 2.65%  | 1.56%  | 1.56%  | 2.08%  | 2.25%  | 2.31%  | 1.79%  | 1.73%  | 1.44%  | 1.50%  | 3.64%  |
| 11    | 1.50%  | 2.08%  | 2.08%  | 2.19%  | 1.62%  | 1.15%  | 1.38%  | 1.44%  | 1.56%  | 1.67%  | 1.56%  | 1.85%  | 1.90%  | 1.96%  | 1.79%  | 6.00%  |

|    |       |       |       |       |       |       |       |       |       |       |       |       |       |       |       |       |
|----|-------|-------|-------|-------|-------|-------|-------|-------|-------|-------|-------|-------|-------|-------|-------|-------|
| 12 | 1.33% | 1.62% | 2.02% | 1.79% | 1.33% | 0.98% | 1.38% | 2.02% | 1.90% | 1.44% | 1.56% | 1.44% | 1.73% | 1.79% | 2.02% | 4.62% |
| 13 | 2.19% | 1.56% | 1.44% | 1.10% | 1.10% | 1.27% | 1.15% | 1.50% | 1.21% | 1.38% | 1.10% | 1.73% | 1.62% | 1.56% | 1.85% | 2.94% |
| 14 | 2.02% | 1.38% | 1.10% | 1.62% | 1.56% | 1.96% | 1.96% | 1.33% | 1.10% | 1.27% | 1.62% | 1.33% | 1.50% | 1.67% | 1.21% | 2.54% |
| 15 | 1.27% | 1.15% | 0.92% | 1.44% | 1.44% | 1.79% | 1.38% | 1.27% | 1.67% | 0.92% | 1.33% | 0.87% | 0.81% | 1.15% | 1.21% | 2.60% |
| 16 | 1.33% | 1.21% | 1.38% | 1.10% | 1.50% | 1.10% | 0.92% | 0.92% | 1.04% | 1.56% | 1.50% | 1.33% | 1.33% | 1.33% | 1.56% | 1.73% |
| 17 | 1.15% | 1.10% | 0.63% | 1.04% | 0.81% | 1.04% | 1.04% | 0.92% | 1.04% | 1.21% | 0.52% | 1.38% | 1.44% | 1.15% | 0.98% | 2.42% |
| 18 | 1.27% | 1.15% | 1.15% | 0.46% | 0.69% | 0.63% | 1.21% | 1.10% | 0.92% | 0.98% | 0.98% | 0.58% | 0.87% | 0.98% | 1.27% | 2.31% |
| 19 | 1.27% | 0.87% | 0.81% | 0.81% | 0.75% | 0.81% | 1.10% | 0.98% | 1.04% | 0.75% | 0.69% | 0.75% | 0.75% | 0.81% | 0.81% | 1.96% |
| 20 | 0.87% | 0.69% | 0.69% | 0.69% | 1.33% | 1.15% | 0.69% | 0.75% | 0.75% | 0.98% | 1.33% | 1.21% | 1.21% | 0.87% | 0.98% | 1.56% |
| 21 | 1.10% | 0.98% | 0.63% | 0.58% | 0.40% | 0.52% | 0.46% | 0.46% | 0.63% | 0.75% | 0.69% | 0.58% | 0.81% | 1.15% | 0.81% | 0.87% |
| 22 | 0.75% | 0.81% | 0.40% | 0.69% | 0.58% | 0.40% | 0.29% | 0.81% | 0.63% | 0.75% | 0.69% | 0.81% | 0.52% | 0.69% | 0.87% | 1.15% |
| 23 | 0.75% | 0.58% | 0.75% | 0.69% | 0.40% | 0.75% | 0.87% | 0.75% | 0.98% | 0.63% | 0.63% | 0.63% | 0.87% | 0.75% | 0.69% | 2.37% |
| 24 | 0.92% | 0.69% | 0.63% | 0.52% | 0.63% | 0.63% | 0.69% | 0.58% | 0.23% | 0.52% | 0.63% | 0.81% | 0.46% | 0.52% | 0.81% | 1.44% |

|    |       |       |       |       |       |       |       |       |       |       |       |       |       |       |       |       |
|----|-------|-------|-------|-------|-------|-------|-------|-------|-------|-------|-------|-------|-------|-------|-------|-------|
| 25 | 0.81% | 0.58% | 0.69% | 0.63% | 1.04% | 0.92% | 0.87% | 0.63% | 0.69% | 0.92% | 0.92% | 1.04% | 0.69% | 0.69% | 0.58% | 1.21% |
| 26 | 0.81% | 0.63% | 0.87% | 0.87% | 0.40% | 0.63% | 0.75% | 0.98% | 0.98% | 0.58% | 0.63% | 0.75% | 0.81% | 0.63% | 0.63% | 1.27% |
| 27 | 0.58% | 0.81% | 0.87% | 0.69% | 0.92% | 0.63% | 0.81% | 0.75% | 0.75% | 0.69% | 0.63% | 0.46% | 0.52% | 0.46% | 0.35% | 0.87% |
| 28 | 0.69% | 0.58% | 0.81% | 0.87% | 0.63% | 0.63% | 0.75% | 0.63% | 0.40% | 0.69% | 0.52% | 0.46% | 0.58% | 0.87% | 0.52% | 0.81% |
| 29 | 0.69% | 1.04% | 0.58% | 0.87% | 0.87% | 0.81% | 0.46% | 0.52% | 0.69% | 0.40% | 0.52% | 0.52% | 0.58% | 0.46% | 0.75% | 1.38% |
| 30 | 0.52% | 0.69% | 0.81% | 0.58% | 0.58% | 0.63% | 0.52% | 0.46% | 0.40% | 0.63% | 1.10% | 0.75% | 0.63% | 0.63% | 0.29% | 0.46% |
| 31 | 0.52% | 0.58% | 0.63% | 0.46% | 0.63% | 0.63% | 0.87% | 0.69% | 0.63% | 0.46% | 0.12% | 0.58% | 0.63% | 0.63% | 1.04% | 0.63% |
| 32 | 0.81% | 0.46% | 0.63% | 0.63% | 0.46% | 0.52% | 0.63% | 0.81% | 0.58% | 0.40% | 0.69% | 0.46% | 0.63% | 0.52% | 0.63% | 0.69% |
| 33 | 0.23% | 0.46% | 0.46% | 0.69% | 0.46% | 0.58% | 0.35% | 0.40% | 0.58% | 0.35% | 0.52% | 0.58% | 0.75% | 0.58% | 0.63% | 1.04% |
| 34 | 0.58% | 0.40% | 0.23% | 0.35% | 0.69% | 0.40% | 0.35% | 0.46% | 0.35% | 0.81% | 0.46% | 0.87% | 0.69% | 0.87% | 0.75% | 0.81% |
| 35 | 0.46% | 0.63% | 0.23% | 0.29% | 0.46% | 0.58% | 0.58% | 0.35% | 0.75% | 0.63% | 0.98% | 0.58% | 0.29% | 0.52% | 0.58% | 0.87% |
| 36 | 0.46% | 0.58% | 0.63% | 0.75% | 0.46% | 0.69% | 0.69% | 0.69% | 0.63% | 0.63% | 0.52% | 0.35% | 0.46% | 0.29% | 0.58% | 0.81% |
| 37 | 0.46% | 0.35% | 0.69% | 0.40% | 0.23% | 0.52% | 0.40% | 0.58% | 0.52% | 0.46% | 0.29% | 0.40% | 0.52% | 0.98% | 0.81% | 0.98% |

|    |       |       |       |       |       |       |       |       |       |       |       |       |       |       |       |       |
|----|-------|-------|-------|-------|-------|-------|-------|-------|-------|-------|-------|-------|-------|-------|-------|-------|
| 38 | 0.75% | 0.12% | 0.35% | 0.40% | 0.63% | 0.29% | 0.52% | 0.75% | 0.52% | 0.46% | 0.29% | 0.46% | 0.75% | 0.63% | 0.69% | 0.81% |
| 39 | 0.12% | 0.75% | 0.40% | 0.35% | 0.35% | 0.23% | 0.35% | 0.35% | 0.40% | 0.35% | 0.40% | 0.29% | 0.58% | 0.52% | 0.63% | 0.75% |
| 40 | 0.46% | 0.29% | 0.69% | 0.35% | 0.35% | 0.46% | 0.23% | 0.12% | 0.23% | 0.35% | 0.46% | 0.63% | 0.40% | 0.52% | 0.58% | 0.35% |
| 41 | 0.46% | 0.81% | 0.23% | 0.35% | 0.17% | 0.12% | 0.23% | 0.29% | 0.46% | 0.52% | 0.63% | 0.63% | 0.46% | 0.52% | 0.46% | 0.35% |
| 42 | 0.46% | 0.23% | 0.29% | 0.35% | 0.29% | 0.46% | 0.46% | 0.35% | 0.35% | 0.52% | 0.40% | 0.35% | 0.58% | 0.46% | 0.35% | 0.58% |
| 43 | 0.23% | 0.29% | 0.40% | 0.23% | 0.69% | 0.29% | 0.29% | 0.58% | 0.58% | 0.58% | 0.40% | 0.46% | 0.23% | 0.40% | 0.35% | 0.46% |
| 44 | 0.52% | 0.29% | 0.46% | 0.58% | 0.35% | 0.58% | 0.40% | 0.40% | 0.35% | 0.40% | 0.58% | 0.35% | 0.35% | 0.12% | 0.52% | 0.23% |
| 45 | 0.35% | 0.46% | 0.29% | 0.58% | 0.52% | 0.58% | 0.58% | 0.40% | 0.58% | 0.35% | 0.58% | 0.58% | 0.63% | 0.69% | 0.46% | 0.69% |
| 46 | 0.52% | 0.23% | 0.29% | 0.23% | 0.35% | 0.29% | 0.58% | 0.40% | 0.35% | 0.58% | 0.23% | 0.63% | 0.52% | 0.69% | 0.69% | 0.58% |
| 47 | 0.52% | 0.40% | 0.35% | 0.23% | 0.35% | 0.46% | 0.23% | 0.23% | 0.29% | 0.29% | 0.46% | 0.52% | 0.40% | 0.29% | 0.29% | 0.35% |
| 48 | 0.23% | 0.23% | 0.35% | 0.35% | 0.29% | 0.35% | 0.58% | 0.58% | 0.46% | 0.35% | 0.40% | 0.29% | 0.52% | 0.52% | 0.52% | 0.46% |
| 49 | 0.23% | 0.29% | 0.29% | 0.23% | 0.12% | 0.12% | 0.17% | 0.46% | 0.23% | 0.35% | 0.23% | 0.29% | 0.29% | 0.29% | 0.35% | 0.29% |
| 50 | 0.52% | 0.35% | 0.17% | 0.29% | 0.12% | 0.23% | 0.29% | 0.23% | 0.40% | 0.23% | 0.40% | 0.29% | 0.40% | 0.46% | 0.35% | 0.40% |

|    |       |       |       |       |       |       |       |       |       |       |       |       |       |       |       |       |
|----|-------|-------|-------|-------|-------|-------|-------|-------|-------|-------|-------|-------|-------|-------|-------|-------|
| 51 | 0.12% | 0.29% | 0.12% | 0.23% | 0.40% | 0.35% | 0.35% | 0.29% | 0.35% | 0.46% | 0.40% | 0.58% | 0.63% | 0.58% | 0.63% | 0.58% |
| 52 | 0.29% | 0.23% | 0.29% | 0.23% | 0.29% | 0.29% | 0.23% | 0.06% | 0.29% | 0.35% | 0.29% | 0.35% | 0.29% | 0.29% | 0.29% | 0.35% |
| 53 | 0.23% | 0.35% | 0.40% | 0.29% | 0.29% | 0.17% | 0.17% | 0.40% | 0.17% | 0.23% | 0.23% | 0.12% | 0.12% | 0.12% | 0.12% | 0.12% |
| 54 | 0.35% | 0.23% | 0.23% | 0.35% | 0.35% | 0.23% | 0.17% | 0.06% | 0.29% | 0.23% | 0.35% | 0.29% | 0.29% | 0.29% | 0.29% | 0.29% |
| 55 | 0.40% | 0.40% | 0.40% | 0.35% | 0.35% | 0.40% | 0.40% | 0.40% | 0.35% | 0.35% | 0.17% | 0.17% | 0.17% | 0.17% | 0.17% | 0.17% |
| 56 | 0.12% | 0.12% | 0.12% | 0.06% | 0.06% | 0.12% | 0.12% | 0.17% | 0.17% | 0.17% | 0.29% | 0.29% | 0.29% | 0.29% | 0.29% | 0.29% |

(4) Similarity scores with fingerprint FCFP\_2

| Order | k=1    | k=2    | k=3    | k=4    | k=5    | k=6    | k=7    | k=8    | k=9    | k=10   | k=11   | k=12   | k=13   | k=14   | k=15   | k=1732 |
|-------|--------|--------|--------|--------|--------|--------|--------|--------|--------|--------|--------|--------|--------|--------|--------|--------|
| 1     | 38.78% | 42.87% | 42.87% | 42.07% | 41.26% | 41.49% | 41.14% | 39.76% | 38.89% | 38.03% | 37.39% | 36.70% | 36.41% | 36.18% | 35.89% | 12.98% |
| 2     | 19.97% | 19.39% | 18.81% | 18.47% | 18.98% | 17.89% | 17.54% | 17.60% | 18.18% | 18.58% | 18.41% | 18.00% | 18.06% | 17.71% | 17.14% | 14.71% |
| 3     | 10.39% | 8.14%  | 8.94%  | 9.98%  | 9.17%  | 8.83%  | 9.06%  | 9.00%  | 8.66%  | 8.02%  | 8.48%  | 8.77%  | 8.66%  | 8.48%  | 8.83%  | 7.91%  |
| 4     | 5.37%  | 7.33%  | 7.33%  | 6.87%  | 7.39%  | 7.21%  | 6.87%  | 7.56%  | 7.16%  | 7.56%  | 6.92%  | 6.75%  | 6.52%  | 6.87%  | 7.04%  | 9.87%  |
| 5     | 4.44%  | 4.85%  | 4.15%  | 4.44%  | 4.85%  | 5.65%  | 5.25%  | 4.44%  | 4.39%  | 4.79%  | 5.02%  | 4.90%  | 5.02%  | 4.67%  | 4.62%  | 6.98%  |

|    |       |       |       |       |       |       |       |       |       |       |       |       |       |       |       |       |
|----|-------|-------|-------|-------|-------|-------|-------|-------|-------|-------|-------|-------|-------|-------|-------|-------|
| 6  | 4.39% | 3.29% | 3.75% | 4.15% | 3.92% | 4.21% | 4.73% | 4.56% | 4.33% | 4.04% | 4.10% | 4.10% | 3.64% | 3.69% | 3.29% | 4.56% |
| 7  | 3.75% | 3.12% | 3.23% | 3.12% | 3.29% | 3.17% | 3.12% | 3.52% | 3.46% | 3.64% | 3.69% | 4.04% | 3.98% | 4.27% | 4.27% | 3.23% |
| 8  | 3.46% | 2.77% | 2.77% | 2.42% | 2.25% | 2.48% | 2.65% | 3.00% | 3.17% | 3.29% | 3.46% | 3.29% | 3.46% | 3.00% | 3.12% | 3.46% |
| 9  | 2.42% | 2.31% | 2.60% | 2.25% | 2.37% | 1.96% | 2.19% | 2.71% | 2.42% | 2.48% | 2.71% | 2.83% | 2.83% | 2.89% | 2.94% | 4.21% |
| 10 | 1.90% | 2.31% | 2.71% | 2.60% | 2.08% | 2.08% | 2.60% | 2.48% | 2.94% | 1.90% | 1.85% | 2.42% | 2.54% | 2.31% | 2.42% | 3.75% |
| 11 | 1.62% | 2.31% | 2.19% | 2.19% | 2.25% | 2.19% | 1.79% | 1.79% | 2.37% | 2.42% | 2.14% | 1.73% | 1.73% | 2.54% | 1.73% | 3.64% |
| 12 | 1.90% | 2.25% | 1.50% | 1.79% | 1.96% | 1.62% | 1.85% | 1.96% | 1.85% | 2.08% | 1.79% | 2.31% | 2.25% | 1.85% | 2.19% | 4.67% |
| 13 | 2.08% | 1.79% | 2.02% | 1.15% | 1.90% | 1.79% | 1.44% | 1.85% | 1.67% | 2.14% | 2.37% | 2.14% | 2.42% | 2.19% | 2.60% | 3.92% |
| 14 | 1.79% | 1.67% | 1.04% | 1.67% | 1.56% | 1.85% | 1.62% | 1.90% | 1.90% | 1.79% | 2.02% | 1.96% | 1.79% | 2.42% | 2.31% | 2.19% |
| 15 | 1.38% | 1.38% | 1.10% | 1.33% | 1.50% | 1.44% | 2.02% | 1.21% | 1.62% | 1.67% | 1.90% | 2.08% | 2.25% | 1.96% | 1.96% | 2.65% |
| 16 | 1.21% | 0.40% | 1.79% | 1.67% | 1.56% | 1.96% | 1.50% | 1.79% | 1.67% | 1.67% | 1.44% | 1.62% | 1.56% | 1.62% | 1.56% | 2.31% |
| 17 | 1.33% | 1.50% | 1.04% | 1.56% | 1.44% | 1.44% | 1.85% | 1.56% | 1.15% | 1.62% | 1.73% | 1.73% | 1.50% | 1.44% | 1.33% | 1.44% |
| 18 | 1.15% | 0.98% | 0.98% | 1.33% | 0.98% | 1.62% | 1.33% | 1.15% | 1.85% | 1.67% | 1.27% | 1.04% | 1.21% | 1.04% | 1.33% | 2.42% |

|    |       |       |       |       |       |       |       |       |       |       |       |       |       |       |       |       |
|----|-------|-------|-------|-------|-------|-------|-------|-------|-------|-------|-------|-------|-------|-------|-------|-------|
| 19 | 1.44% | 0.92% | 1.38% | 1.44% | 1.33% | 1.21% | 1.21% | 1.56% | 1.50% | 0.75% | 0.69% | 0.63% | 0.98% | 0.87% | 1.04% | 1.73% |
| 20 | 1.04% | 1.21% | 1.04% | 0.92% | 1.62% | 1.21% | 1.10% | 1.33% | 0.98% | 0.92% | 0.63% | 0.75% | 0.81% | 1.04% | 0.87% | 1.79% |
| 21 | 1.10% | 0.98% | 1.33% | 1.73% | 1.21% | 1.21% | 0.81% | 0.75% | 0.75% | 0.98% | 1.04% | 0.52% | 0.75% | 0.98% | 0.81% | 1.67% |
| 22 | 0.81% | 1.10% | 0.98% | 0.81% | 1.04% | 0.92% | 0.87% | 0.52% | 0.58% | 0.75% | 0.69% | 1.10% | 0.58% | 0.81% | 0.63% | 1.50% |
| 23 | 0.87% | 1.21% | 0.98% | 0.69% | 0.87% | 0.69% | 0.92% | 0.81% | 0.58% | 0.58% | 0.98% | 0.98% | 0.81% | 0.63% | 0.81% | 1.67% |
| 24 | 0.69% | 0.98% | 0.63% | 0.69% | 0.69% | 0.81% | 0.52% | 0.58% | 0.63% | 0.81% | 1.04% | 0.63% | 0.58% | 0.46% | 1.04% | 1.79% |
| 25 | 0.63% | 0.29% | 0.63% | 0.58% | 0.46% | 0.46% | 0.87% | 0.75% | 0.92% | 0.87% | 0.81% | 1.04% | 0.75% | 0.46% | 0.29% | 1.73% |
| 26 | 0.81% | 0.63% | 0.40% | 0.58% | 0.52% | 0.69% | 0.92% | 0.87% | 0.87% | 0.75% | 0.52% | 0.46% | 0.52% | 0.75% | 0.69% | 1.27% |
| 27 | 1.04% | 0.40% | 0.46% | 0.46% | 0.29% | 0.58% | 0.63% | 0.87% | 0.75% | 0.92% | 0.81% | 0.81% | 0.63% | 0.63% | 0.98% | 1.21% |
| 28 | 0.92% | 0.52% | 0.46% | 0.46% | 0.58% | 0.75% | 0.75% | 0.63% | 0.58% | 0.63% | 0.81% | 0.81% | 0.81% | 1.04% | 1.04% | 0.75% |
| 29 | 0.63% | 0.69% | 0.75% | 0.46% | 0.52% | 0.52% | 0.46% | 0.52% | 0.87% | 0.63% | 0.46% | 0.87% | 1.15% | 1.04% | 0.98% | 1.04% |
| 30 | 1.21% | 0.81% | 0.58% | 0.52% | 0.46% | 0.46% | 0.40% | 0.35% | 0.23% | 0.75% | 0.92% | 0.75% | 0.81% | 0.75% | 0.52% | 1.56% |
| 31 | 0.63% | 0.58% | 0.29% | 0.69% | 0.69% | 0.69% | 0.69% | 0.69% | 0.52% | 0.58% | 0.75% | 0.69% | 0.69% | 0.75% | 0.98% | 1.04% |



|    |       |       |       |       |       |       |       |       |       |       |       |       |       |       |       |       |
|----|-------|-------|-------|-------|-------|-------|-------|-------|-------|-------|-------|-------|-------|-------|-------|-------|
| 32 | 0.58% | 0.75% | 0.75% | 0.63% | 0.92% | 0.40% | 0.35% | 0.75% | 0.52% | 0.81% | 0.75% | 0.58% | 0.92% | 0.87% | 0.52% | 0.98% |
| 33 | 0.46% | 0.29% | 0.58% | 0.46% | 0.23% | 0.46% | 0.75% | 0.58% | 0.98% | 0.63% | 0.58% | 0.87% | 0.63% | 0.63% | 0.81% | 1.10% |
| 34 | 0.17% | 0.58% | 0.58% | 0.75% | 0.58% | 0.46% | 0.35% | 0.69% | 0.46% | 0.58% | 0.46% | 0.81% | 0.87% | 0.52% | 0.58% | 0.92% |
| 35 | 0.63% | 0.29% | 0.52% | 0.35% | 0.29% | 0.58% | 0.63% | 0.52% | 0.63% | 0.46% | 0.75% | 0.52% | 0.58% | 0.87% | 0.81% | 0.52% |
| 36 | 0.29% | 0.63% | 0.63% | 0.40% | 0.69% | 0.35% | 0.58% | 0.46% | 0.63% | 0.52% | 0.63% | 0.58% | 0.63% | 0.17% | 0.69% | 0.58% |
| 37 | 0.58% | 0.40% | 0.29% | 0.29% | 0.35% | 0.63% | 0.29% | 0.58% | 0.69% | 0.46% | 0.52% | 0.35% | 0.35% | 0.87% | 0.52% | 0.81% |
| 38 | 0.29% | 0.58% | 0.46% | 0.35% | 0.29% | 0.40% | 0.52% | 0.29% | 0.23% | 0.52% | 0.35% | 0.46% | 0.63% | 0.63% | 0.69% | 1.15% |
| 39 | 0.12% | 0.52% | 0.40% | 0.52% | 0.52% | 0.29% | 0.58% | 0.29% | 0.58% | 0.58% | 0.69% | 0.87% | 0.69% | 0.98% | 0.69% | 0.46% |
| 40 | 0.35% | 0.23% | 0.29% | 0.58% | 0.52% | 0.58% | 0.29% | 0.75% | 0.58% | 0.58% | 0.63% | 0.69% | 0.87% | 0.92% | 0.69% | 0.81% |
| 41 | 0.58% | 0.35% | 0.46% | 0.63% | 0.40% | 0.35% | 0.35% | 0.69% | 0.87% | 1.10% | 0.81% | 0.63% | 1.15% | 0.98% | 1.21% | 0.92% |
| 42 | 0.40% | 0.35% | 0.46% | 0.17% | 0.17% | 0.35% | 0.58% | 0.35% | 0.35% | 0.40% | 0.58% | 0.75% | 0.35% | 0.46% | 0.63% | 0.98% |
| 43 | 0.40% | 0.40% | 0.35% | 0.35% | 0.46% | 0.29% | 0.52% | 0.35% | 0.35% | 0.35% | 0.63% | 0.46% | 0.17% | 0.29% | 0.29% | 0.58% |
| 44 | 0.29% | 0.40% | 0.17% | 0.17% | 0.29% | 0.35% | 0.17% | 0.17% | 0.29% | 0.35% | 0.46% | 0.52% | 0.46% | 0.40% | 0.40% | 0.29% |

|    |       |       |       |       |       |       |       |       |       |       |       |       |       |       |       |       |
|----|-------|-------|-------|-------|-------|-------|-------|-------|-------|-------|-------|-------|-------|-------|-------|-------|
| 45 | 0.58% | 0.12% | 0.40% | 0.35% | 0.58% | 0.63% | 0.46% | 0.58% | 0.40% | 0.35% | 0.40% | 0.29% | 0.75% | 0.58% | 0.58% | 0.46% |
| 46 | 0.40% | 0.29% | 0.29% | 0.52% | 0.40% | 0.46% | 0.40% | 0.52% | 0.40% | 0.46% | 0.29% | 0.35% | 0.23% | 0.35% | 0.46% | 0.29% |
| 47 | 0.46% | 0.29% | 0.40% | 0.46% | 0.46% | 0.46% | 0.52% | 0.29% | 0.23% | 0.40% | 0.17% | 0.23% | 0.23% | 0.40% | 0.29% | 0.58% |
| 48 | 0.46% | 0.69% | 0.52% | 0.17% | 0.23% | 0.29% | 0.40% | 0.29% | 0.35% | 0.06% | 0.23% | 0.35% | 0.40% | 0.40% | 0.52% | 0.52% |
| 49 | 0.29% | 0.40% | 0.35% | 0.52% | 0.46% | 0.23% | 0.23% | 0.23% | 0.17% | 0.00% | 0.23% | 0.23% | 0.46% | 0.35% | 0.29% | 0.23% |
| 50 | 0.46% | 0.35% | 0.29% | 0.29% | 0.12% | 0.29% | 0.06% | 0.17% | 0.12% | 0.23% | 0.17% | 0.35% | 0.46% | 0.46% | 0.46% | 0.52% |
| 51 | 0.17% | 0.35% | 0.40% | 0.23% | 0.12% | 0.12% | 0.23% | 0.23% | 0.29% | 0.35% | 0.58% | 0.52% | 0.35% | 0.40% | 0.35% | 0.35% |
| 52 | 0.40% | 0.35% | 0.17% | 0.29% | 0.35% | 0.29% | 0.23% | 0.23% | 0.29% | 0.35% | 0.29% | 0.23% | 0.17% | 0.17% | 0.35% | 0.29% |
| 53 | 0.12% | 0.17% | 0.17% | 0.12% | 0.29% | 0.29% | 0.29% | 0.40% | 0.69% | 0.58% | 0.40% | 0.40% | 0.40% | 0.40% | 0.40% | 0.46% |
| 54 | 0.29% | 0.23% | 0.17% | 0.23% | 0.23% | 0.35% | 0.58% | 0.63% | 0.46% | 0.46% | 0.23% | 0.23% | 0.23% | 0.23% | 0.23% | 0.17% |
| 55 | 0.29% | 0.17% | 0.40% | 0.35% | 0.40% | 0.29% | 0.23% | 0.17% | 0.17% | 0.29% | 0.40% | 0.40% | 0.40% | 0.40% | 0.40% | 0.46% |
| 56 | 0.12% | 0.17% | 0.06% | 0.06% | 0.00% | 0.06% | 0.06% | 0.06% | 0.17% | 0.17% | 0.23% | 0.23% | 0.23% | 0.23% | 0.23% | 0.23% |

(5) Similarity scores with fingerprint FCFP\_4

| Order | k=1    | k=2    | k=3    | k=4    | k=5    | k=6    | k=7    | k=8    | k=9    | k=10   | k=11   | k=12   | k=13   | k=14   | k=15   | k=1732 |
|-------|--------|--------|--------|--------|--------|--------|--------|--------|--------|--------|--------|--------|--------|--------|--------|--------|
| 1     | 45.35% | 47.95% | 48.07% | 47.78% | 47.55% | 46.97% | 46.80% | 45.70% | 45.07% | 44.43% | 43.97% | 43.05% | 42.41% | 42.12% | 41.37% | 16.04% |
| 2     | 19.73% | 19.56% | 19.16% | 19.56% | 19.10% | 18.93% | 18.35% | 18.58% | 18.75% | 18.70% | 18.12% | 18.75% | 18.41% | 17.95% | 17.95% | 13.85% |
| 3     | 8.02%  | 8.14%  | 8.83%  | 8.02%  | 8.54%  | 8.71%  | 9.23%  | 9.35%  | 8.77%  | 9.00%  | 9.23%  | 8.31%  | 8.02%  | 7.96%  | 7.67%  | 8.37%  |
| 4     | 6.06%  | 4.96%  | 5.42%  | 5.83%  | 5.37%  | 5.77%  | 5.65%  | 5.89%  | 5.42%  | 4.90%  | 5.42%  | 6.00%  | 6.17%  | 6.23%  | 6.46%  | 8.77%  |
| 5     | 3.87%  | 4.27%  | 4.27%  | 4.44%  | 4.39%  | 3.98%  | 3.64%  | 3.64%  | 4.10%  | 4.33%  | 3.58%  | 3.64%  | 4.62%  | 4.67%  | 4.56%  | 6.92%  |
| 6     | 2.42%  | 3.69%  | 3.17%  | 2.48%  | 3.17%  | 3.12%  | 3.40%  | 3.29%  | 3.64%  | 4.15%  | 3.87%  | 3.81%  | 3.52%  | 3.64%  | 3.75%  | 4.50%  |
| 7     | 2.71%  | 2.89%  | 2.65%  | 3.17%  | 2.77%  | 3.23%  | 3.52%  | 3.75%  | 3.40%  | 3.06%  | 3.40%  | 3.69%  | 3.87%  | 3.87%  | 4.33%  | 3.58%  |
| 8     | 3.17%  | 2.25%  | 2.37%  | 2.60%  | 3.00%  | 2.89%  | 3.35%  | 3.64%  | 3.81%  | 3.46%  | 3.75%  | 3.12%  | 2.71%  | 2.77%  | 2.42%  | 2.83%  |
| 9     | 2.37%  | 1.96%  | 2.25%  | 2.19%  | 2.77%  | 2.77%  | 2.08%  | 2.14%  | 2.48%  | 2.77%  | 2.60%  | 3.06%  | 2.83%  | 2.77%  | 2.89%  | 3.87%  |
| 10    | 1.44%  | 2.19%  | 2.19%  | 2.31%  | 2.08%  | 2.08%  | 2.19%  | 2.25%  | 2.25%  | 2.14%  | 2.48%  | 2.31%  | 1.79%  | 1.79%  | 1.67%  | 3.64%  |
| 11    | 1.85%  | 1.44%  | 2.14%  | 2.65%  | 2.19%  | 2.42%  | 2.25%  | 1.96%  | 1.67%  | 1.90%  | 1.96%  | 1.90%  | 1.73%  | 1.96%  | 1.90%  | 4.85%  |
| 12    | 2.31%  | 1.04%  | 1.79%  | 1.67%  | 1.73%  | 1.67%  | 1.79%  | 1.62%  | 1.56%  | 1.33%  | 1.50%  | 1.90%  | 2.42%  | 2.08%  | 2.25%  | 3.87%  |

|    |       |       |       |       |       |       |       |       |       |       |       |       |       |       |       |       |
|----|-------|-------|-------|-------|-------|-------|-------|-------|-------|-------|-------|-------|-------|-------|-------|-------|
| 13 | 1.96% | 2.25% | 1.73% | 1.67% | 1.50% | 1.10% | 1.15% | 1.27% | 1.62% | 1.56% | 1.33% | 1.21% | 1.73% | 1.73% | 1.50% | 4.39% |
| 14 | 1.21% | 2.31% | 1.79% | 1.50% | 1.85% | 1.62% | 1.79% | 1.50% | 1.85% | 1.62% | 1.38% | 1.56% | 1.38% | 1.56% | 1.73% | 2.54% |
| 15 | 1.73% | 1.67% | 1.10% | 1.21% | 1.62% | 1.96% | 1.33% | 1.44% | 1.15% | 1.44% | 1.33% | 1.21% | 1.56% | 1.50% | 1.67% | 2.25% |
| 16 | 1.33% | 1.44% | 1.44% | 1.27% | 0.69% | 0.63% | 0.92% | 0.98% | 1.27% | 1.44% | 1.79% | 1.33% | 1.27% | 1.44% | 1.56% | 2.02% |
| 17 | 0.92% | 1.44% | 1.27% | 1.38% | 0.87% | 1.15% | 1.33% | 1.44% | 1.21% | 1.04% | 1.27% | 1.67% | 1.67% | 1.27% | 0.98% | 2.42% |
| 18 | 1.50% | 0.58% | 0.75% | 0.92% | 1.38% | 1.04% | 1.04% | 1.67% | 1.50% | 1.33% | 1.21% | 1.04% | 0.98% | 1.33% | 1.85% | 2.48% |
| 19 | 1.38% | 1.04% | 1.04% | 0.81% | 0.87% | 1.15% | 1.33% | 0.92% | 1.10% | 1.33% | 1.15% | 0.87% | 0.92% | 0.98% | 0.46% | 1.79% |
| 20 | 0.75% | 0.75% | 0.58% | 0.75% | 0.69% | 1.10% | 1.15% | 0.58% | 0.75% | 0.81% | 0.81% | 1.15% | 0.63% | 0.75% | 0.98% | 1.56% |
| 21 | 1.62% | 0.87% | 0.98% | 0.92% | 1.15% | 0.69% | 0.58% | 0.46% | 0.52% | 0.46% | 0.46% | 0.92% | 1.10% | 0.92% | 1.10% | 0.98% |
| 22 | 0.92% | 0.81% | 0.69% | 0.63% | 0.87% | 0.40% | 0.58% | 0.98% | 0.52% | 0.98% | 0.98% | 0.98% | 0.58% | 0.87% | 0.52% | 1.27% |
| 23 | 0.87% | 0.81% | 0.63% | 0.75% | 0.52% | 0.58% | 0.81% | 0.75% | 0.87% | 0.75% | 0.63% | 0.40% | 1.04% | 0.75% | 0.75% | 1.90% |
| 24 | 0.92% | 0.63% | 0.58% | 0.75% | 0.46% | 1.04% | 0.46% | 0.81% | 0.81% | 0.58% | 0.69% | 0.81% | 0.87% | 0.92% | 1.10% | 2.14% |
| 25 | 0.58% | 0.63% | 0.75% | 0.81% | 0.92% | 0.69% | 0.46% | 0.52% | 0.52% | 0.69% | 0.69% | 0.46% | 0.58% | 0.40% | 0.63% | 1.96% |

|    |       |       |       |       |       |       |       |       |       |       |       |       |       |       |       |       |
|----|-------|-------|-------|-------|-------|-------|-------|-------|-------|-------|-------|-------|-------|-------|-------|-------|
| 26 | 0.46% | 0.63% | 0.81% | 0.58% | 0.52% | 0.40% | 0.63% | 0.52% | 0.98% | 0.92% | 1.04% | 0.87% | 0.81% | 0.87% | 0.75% | 0.63% |
| 27 | 0.46% | 0.46% | 0.52% | 0.46% | 0.46% | 0.58% | 0.87% | 0.87% | 0.40% | 0.75% | 0.69% | 0.98% | 0.81% | 1.04% | 0.92% | 1.21% |
| 28 | 0.75% | 0.63% | 0.46% | 0.69% | 0.46% | 0.92% | 0.75% | 0.52% | 0.63% | 0.52% | 0.69% | 0.69% | 0.63% | 0.58% | 0.35% | 0.92% |
| 29 | 0.46% | 0.58% | 0.58% | 0.35% | 0.75% | 0.35% | 0.35% | 0.75% | 0.40% | 0.58% | 0.58% | 0.69% | 0.58% | 0.46% | 0.40% | 1.10% |
| 30 | 0.81% | 0.75% | 0.87% | 0.46% | 0.75% | 0.52% | 0.58% | 0.46% | 0.69% | 0.69% | 0.69% | 0.63% | 0.98% | 0.98% | 0.92% | 1.10% |
| 31 | 0.69% | 0.46% | 0.35% | 0.69% | 0.29% | 0.63% | 0.52% | 0.58% | 0.87% | 0.75% | 0.35% | 0.46% | 0.40% | 0.46% | 0.98% | 1.15% |
| 32 | 0.58% | 0.69% | 0.63% | 0.63% | 0.81% | 0.58% | 0.75% | 0.58% | 0.58% | 0.58% | 1.10% | 0.81% | 0.81% | 0.69% | 0.69% | 0.81% |
| 33 | 0.52% | 0.46% | 1.04% | 0.52% | 0.40% | 0.87% | 0.58% | 0.40% | 0.35% | 0.40% | 0.46% | 0.52% | 0.69% | 0.58% | 0.63% | 1.15% |
| 34 | 0.40% | 0.52% | 0.29% | 0.52% | 0.40% | 0.40% | 0.29% | 0.40% | 0.35% | 0.46% | 0.52% | 0.58% | 0.58% | 0.52% | 0.35% | 0.87% |
| 35 | 0.58% | 0.63% | 0.52% | 0.58% | 0.52% | 0.58% | 0.29% | 0.52% | 0.58% | 0.46% | 0.52% | 0.58% | 0.40% | 0.81% | 0.63% | 0.58% |
| 36 | 0.46% | 0.63% | 0.52% | 0.52% | 0.52% | 0.40% | 0.75% | 0.46% | 0.75% | 0.52% | 0.58% | 0.35% | 0.40% | 0.58% | 0.92% | 0.69% |
| 37 | 0.35% | 0.35% | 0.35% | 0.46% | 0.46% | 0.40% | 0.35% | 0.35% | 0.52% | 0.69% | 0.23% | 0.58% | 0.52% | 0.69% | 0.63% | 0.75% |
| 38 | 0.81% | 0.40% | 0.52% | 0.52% | 0.52% | 0.40% | 0.63% | 0.46% | 0.23% | 0.12% | 0.40% | 0.40% | 0.52% | 0.35% | 0.58% | 0.40% |

|    |       |       |       |       |       |       |       |       |       |       |       |       |       |       |       |       |
|----|-------|-------|-------|-------|-------|-------|-------|-------|-------|-------|-------|-------|-------|-------|-------|-------|
| 39 | 0.29% | 0.52% | 0.35% | 0.29% | 0.29% | 0.29% | 0.40% | 0.63% | 0.35% | 0.52% | 0.35% | 0.40% | 0.69% | 0.75% | 0.46% | 0.75% |
| 40 | 0.87% | 0.35% | 0.40% | 0.52% | 0.52% | 0.52% | 0.40% | 0.23% | 0.35% | 0.46% | 0.81% | 0.98% | 0.75% | 0.52% | 0.63% | 0.58% |
| 41 | 0.40% | 0.35% | 0.23% | 0.17% | 0.29% | 0.40% | 0.63% | 0.35% | 0.58% | 0.87% | 0.52% | 0.75% | 0.75% | 1.04% | 0.92% | 0.98% |
| 42 | 0.35% | 0.23% | 0.17% | 0.35% | 0.35% | 0.23% | 0.12% | 0.81% | 0.52% | 0.35% | 0.63% | 0.35% | 0.46% | 0.52% | 0.81% | 0.92% |
| 43 | 0.29% | 0.29% | 0.40% | 0.40% | 0.23% | 0.17% | 0.58% | 0.35% | 0.46% | 0.46% | 0.63% | 0.46% | 0.52% | 0.29% | 0.40% | 0.69% |
| 44 | 0.29% | 0.17% | 0.23% | 0.06% | 0.40% | 0.75% | 0.40% | 0.75% | 0.63% | 0.29% | 0.23% | 0.40% | 0.23% | 0.29% | 0.23% | 0.29% |
| 45 | 0.23% | 0.52% | 0.23% | 0.35% | 0.17% | 0.17% | 0.29% | 0.23% | 0.46% | 0.69% | 0.58% | 0.35% | 0.40% | 0.29% | 0.17% | 0.17% |
| 46 | 0.52% | 0.29% | 0.46% | 0.58% | 0.35% | 0.46% | 0.52% | 0.58% | 0.40% | 0.23% | 0.17% | 0.35% | 0.58% | 0.58% | 0.46% | 0.17% |
| 47 | 0.17% | 0.23% | 0.23% | 0.17% | 0.63% | 0.35% | 0.17% | 0.06% | 0.23% | 0.29% | 0.23% | 0.17% | 0.23% | 0.52% | 0.58% | 0.75% |
| 48 | 0.35% | 0.40% | 0.35% | 0.17% | 0.06% | 0.17% | 0.17% | 0.17% | 0.17% | 0.06% | 0.17% | 0.29% | 0.40% | 0.46% | 0.52% | 0.52% |
| 49 | 0.35% | 0.52% | 0.58% | 0.40% | 0.29% | 0.17% | 0.12% | 0.17% | 0.23% | 0.35% | 0.29% | 0.40% | 0.12% | 0.12% | 0.17% | 0.23% |
| 50 | 0.29% | 0.23% | 0.00% | 0.17% | 0.35% | 0.17% | 0.46% | 0.29% | 0.12% | 0.35% | 0.46% | 0.35% | 0.40% | 0.35% | 0.23% | 0.23% |
| 51 | 0.40% | 0.23% | 0.35% | 0.35% | 0.12% | 0.35% | 0.23% | 0.29% | 0.40% | 0.23% | 0.40% | 0.40% | 0.52% | 0.46% | 0.52% | 0.46% |

|    |       |       |       |       |       |       |       |       |       |       |       |       |       |       |       |       |
|----|-------|-------|-------|-------|-------|-------|-------|-------|-------|-------|-------|-------|-------|-------|-------|-------|
| 52 | 0.17% | 0.23% | 0.35% | 0.40% | 0.40% | 0.46% | 0.35% | 0.52% | 0.58% | 0.52% | 0.29% | 0.35% | 0.23% | 0.23% | 0.29% | 0.35% |
| 53 | 0.29% | 0.52% | 0.29% | 0.23% | 0.35% | 0.29% | 0.35% | 0.23% | 0.17% | 0.23% | 0.23% | 0.17% | 0.23% | 0.23% | 0.23% | 0.23% |
| 54 | 0.58% | 0.23% | 0.35% | 0.29% | 0.35% | 0.29% | 0.17% | 0.17% | 0.17% | 0.29% | 0.29% | 0.29% | 0.29% | 0.29% | 0.29% | 0.29% |
| 55 | 0.06% | 0.12% | 0.17% | 0.29% | 0.23% | 0.29% | 0.35% | 0.35% | 0.35% | 0.23% | 0.23% | 0.23% | 0.17% | 0.17% | 0.17% | 0.17% |
| 56 | 0.12% | 0.12% | 0.12% | 0.06% | 0.06% | 0.06% | 0.12% | 0.17% | 0.23% | 0.29% | 0.35% | 0.35% | 0.40% | 0.40% | 0.40% | 0.40% |

(6) Similarity scores with fingerprint FCFP\_6

| Order | k=1    | k=2    | k=3    | k=4    | k=5    | k=6    | k=7    | k=8    | k=9    | k=10   | k=11   | k=12   | k=13   | k=14   | k=15   | k=1732 |
|-------|--------|--------|--------|--------|--------|--------|--------|--------|--------|--------|--------|--------|--------|--------|--------|--------|
| 1     | 45.99% | 48.70% | 48.99% | 48.64% | 48.41% | 48.01% | 47.43% | 46.91% | 46.39% | 46.11% | 45.12% | 44.55% | 43.97% | 43.34% | 42.76% | 17.31% |
| 2     | 19.22% | 18.75% | 18.81% | 19.10% | 19.27% | 19.79% | 19.45% | 19.27% | 19.33% | 18.70% | 18.58% | 18.06% | 17.95% | 17.83% | 17.66% | 13.50% |
| 3     | 7.85%  | 7.56%  | 8.48%  | 8.71%  | 8.37%  | 7.67%  | 8.54%  | 8.71%  | 8.54%  | 8.66%  | 9.64%  | 9.64%  | 9.29%  | 9.00%  | 9.17%  | 8.66%  |
| 4     | 5.25%  | 5.42%  | 5.42%  | 5.14%  | 5.48%  | 5.77%  | 5.48%  | 4.96%  | 5.31%  | 5.31%  | 4.67%  | 5.14%  | 5.48%  | 5.89%  | 5.54%  | 9.00%  |
| 5     | 4.56%  | 4.56%  | 3.64%  | 4.39%  | 4.21%  | 4.15%  | 4.21%  | 4.50%  | 3.87%  | 4.56%  | 4.33%  | 4.79%  | 4.44%  | 4.27%  | 4.44%  | 6.87%  |
| 6     | 2.42%  | 3.12%  | 3.69%  | 3.52%  | 3.40%  | 3.40%  | 3.12%  | 3.69%  | 4.04%  | 3.69%  | 3.98%  | 3.87%  | 3.87%  | 3.87%  | 3.64%  | 3.81%  |

|    |       |       |       |       |       |       |       |       |       |       |       |       |       |       |       |       |
|----|-------|-------|-------|-------|-------|-------|-------|-------|-------|-------|-------|-------|-------|-------|-------|-------|
| 7  | 2.65% | 3.12% | 3.23% | 2.89% | 2.94% | 3.06% | 3.40% | 3.29% | 3.64% | 3.58% | 3.52% | 2.83% | 3.12% | 3.23% | 3.29% | 3.17% |
| 8  | 2.48% | 2.48% | 2.25% | 2.48% | 2.25% | 2.60% | 2.71% | 2.54% | 2.83% | 2.94% | 3.12% | 3.52% | 3.23% | 3.12% | 3.12% | 3.12% |
| 9  | 2.25% | 2.25% | 2.37% | 2.37% | 2.94% | 2.65% | 2.65% | 2.42% | 1.79% | 2.08% | 2.14% | 2.14% | 1.85% | 1.96% | 2.60% | 4.33% |
| 10 | 2.54% | 1.85% | 1.73% | 1.67% | 1.67% | 1.79% | 1.67% | 1.96% | 1.79% | 1.62% | 1.85% | 1.85% | 2.25% | 2.83% | 2.42% | 3.35% |
| 11 | 2.02% | 1.56% | 1.79% | 1.73% | 1.67% | 1.73% | 1.79% | 1.44% | 1.79% | 1.67% | 1.85% | 1.85% | 1.90% | 1.79% | 1.90% | 4.96% |
| 12 | 2.08% | 2.14% | 1.73% | 1.38% | 1.73% | 1.56% | 1.79% | 1.96% | 1.85% | 2.08% | 1.85% | 1.96% | 2.19% | 1.44% | 1.62% | 4.56% |
| 13 | 2.19% | 1.44% | 1.67% | 1.67% | 1.27% | 1.50% | 1.15% | 1.73% | 1.62% | 1.27% | 1.44% | 1.44% | 1.38% | 1.62% | 1.67% | 4.21% |
| 14 | 1.27% | 1.38% | 1.21% | 1.33% | 1.44% | 1.79% | 1.44% | 1.44% | 1.79% | 1.56% | 1.10% | 1.04% | 1.50% | 1.50% | 1.27% | 2.48% |
| 15 | 1.56% | 1.27% | 1.15% | 1.44% | 1.56% | 1.15% | 1.67% | 1.38% | 0.98% | 1.33% | 1.44% | 1.56% | 1.15% | 1.15% | 1.21% | 2.54% |
| 16 | 1.21% | 1.44% | 1.21% | 1.56% | 0.92% | 0.75% | 0.98% | 0.92% | 1.56% | 1.50% | 1.73% | 1.38% | 1.33% | 1.44% | 1.56% | 2.31% |
| 17 | 1.15% | 1.50% | 1.15% | 0.81% | 1.10% | 1.62% | 1.10% | 1.33% | 0.98% | 1.04% | 1.10% | 1.73% | 1.79% | 2.14% | 1.96% | 2.31% |
| 18 | 1.10% | 1.04% | 1.04% | 1.44% | 1.27% | 0.87% | 0.98% | 1.27% | 1.21% | 1.21% | 1.15% | 1.04% | 1.44% | 1.15% | 1.38% | 1.96% |
| 19 | 0.92% | 0.98% | 1.27% | 1.04% | 1.10% | 0.81% | 1.15% | 0.81% | 1.10% | 1.21% | 1.21% | 1.33% | 0.81% | 0.98% | 0.92% | 0.98% |



|    |       |       |       |       |       |       |       |       |       |       |       |       |       |       |       |       |
|----|-------|-------|-------|-------|-------|-------|-------|-------|-------|-------|-------|-------|-------|-------|-------|-------|
| 20 | 0.98% | 0.81% | 1.27% | 0.92% | 1.15% | 0.69% | 0.69% | 0.87% | 0.98% | 1.04% | 0.81% | 0.46% | 0.69% | 0.87% | 0.92% | 1.56% |
| 21 | 1.67% | 0.87% | 0.81% | 0.81% | 0.52% | 1.27% | 0.81% | 0.87% | 0.58% | 0.63% | 0.63% | 0.75% | 1.10% | 1.15% | 0.63% | 0.87% |
| 22 | 0.58% | 1.15% | 0.98% | 0.81% | 0.75% | 1.21% | 1.04% | 0.98% | 1.15% | 1.10% | 0.87% | 0.98% | 0.69% | 0.69% | 1.33% | 1.73% |
| 23 | 0.92% | 1.04% | 0.63% | 0.87% | 0.98% | 0.69% | 0.58% | 0.87% | 0.58% | 0.75% | 0.75% | 0.92% | 0.46% | 0.52% | 0.75% | 2.25% |
| 24 | 1.21% | 0.58% | 0.81% | 0.52% | 0.81% | 0.69% | 0.92% | 0.35% | 0.63% | 0.81% | 1.04% | 0.58% | 0.98% | 0.87% | 0.63% | 1.73% |
| 25 | 0.92% | 0.75% | 0.75% | 0.46% | 0.69% | 0.29% | 0.75% | 0.63% | 0.29% | 0.46% | 0.58% | 0.52% | 0.63% | 0.58% | 0.63% | 1.90% |
| 26 | 0.81% | 0.63% | 0.63% | 0.92% | 0.69% | 0.92% | 0.46% | 0.63% | 0.69% | 0.35% | 0.46% | 0.52% | 0.87% | 0.69% | 0.52% | 0.87% |
| 27 | 0.58% | 0.46% | 0.23% | 0.69% | 0.58% | 0.69% | 0.81% | 0.63% | 0.58% | 0.29% | 0.40% | 0.81% | 0.69% | 0.75% | 0.63% | 1.21% |
| 28 | 0.75% | 0.35% | 0.46% | 0.40% | 0.92% | 0.69% | 0.63% | 0.69% | 0.75% | 0.63% | 0.58% | 0.29% | 0.40% | 0.58% | 0.58% | 0.98% |
| 29 | 0.63% | 0.81% | 0.17% | 0.46% | 0.35% | 0.46% | 0.52% | 0.58% | 0.63% | 0.69% | 0.75% | 1.04% | 0.81% | 0.35% | 0.75% | 0.98% |
| 30 | 0.52% | 0.58% | 0.75% | 0.58% | 0.46% | 0.40% | 0.35% | 0.46% | 0.46% | 0.69% | 0.81% | 0.58% | 0.58% | 0.92% | 0.75% | 1.04% |
| 31 | 0.52% | 0.58% | 0.46% | 0.35% | 0.46% | 0.40% | 0.52% | 0.40% | 0.69% | 0.87% | 0.58% | 0.69% | 0.58% | 0.40% | 0.46% | 1.10% |
| 32 | 0.58% | 0.46% | 1.04% | 0.75% | 0.52% | 0.40% | 0.81% | 0.69% | 0.58% | 0.58% | 0.58% | 0.81% | 0.46% | 0.69% | 0.63% | 0.75% |

|    |       |       |       |       |       |       |       |       |       |       |       |       |       |       |       |       |
|----|-------|-------|-------|-------|-------|-------|-------|-------|-------|-------|-------|-------|-------|-------|-------|-------|
| 33 | 0.35% | 0.52% | 0.63% | 0.40% | 0.29% | 0.40% | 0.17% | 0.58% | 0.40% | 0.40% | 0.63% | 0.23% | 0.69% | 0.98% | 0.63% | 0.92% |
| 34 | 0.46% | 0.58% | 0.52% | 0.63% | 0.46% | 0.52% | 0.29% | 0.52% | 0.29% | 0.58% | 0.40% | 0.69% | 0.46% | 0.52% | 0.69% | 0.52% |
| 35 | 0.58% | 0.75% | 0.40% | 0.40% | 0.52% | 0.52% | 0.63% | 0.58% | 0.92% | 0.23% | 0.35% | 0.23% | 0.63% | 0.52% | 0.40% | 0.75% |
| 36 | 0.52% | 0.58% | 0.40% | 0.40% | 0.40% | 0.40% | 0.35% | 0.40% | 0.17% | 0.40% | 0.29% | 0.75% | 0.35% | 0.46% | 0.75% | 0.58% |
| 37 | 0.63% | 0.29% | 0.63% | 0.87% | 0.58% | 0.58% | 0.69% | 0.23% | 0.40% | 0.52% | 0.58% | 0.35% | 0.52% | 0.40% | 0.46% | 0.87% |
| 38 | 0.69% | 0.40% | 0.69% | 0.06% | 0.63% | 0.52% | 0.58% | 0.29% | 0.46% | 0.46% | 0.69% | 0.35% | 0.40% | 0.40% | 0.52% | 0.35% |
| 39 | 0.52% | 0.58% | 0.58% | 0.58% | 0.17% | 0.58% | 0.35% | 0.63% | 0.58% | 0.52% | 0.46% | 0.58% | 0.75% | 0.87% | 0.52% | 0.92% |
| 40 | 0.46% | 0.23% | 0.12% | 0.75% | 0.58% | 0.58% | 0.63% | 0.35% | 0.35% | 0.46% | 0.63% | 0.35% | 0.46% | 0.52% | 0.52% | 0.52% |
| 41 | 0.35% | 0.69% | 0.40% | 0.35% | 0.52% | 0.29% | 0.69% | 0.63% | 0.63% | 0.58% | 0.40% | 1.04% | 0.87% | 0.81% | 1.10% | 0.69% |
| 42 | 0.29% | 0.12% | 0.35% | 0.17% | 0.23% | 0.23% | 0.12% | 0.52% | 0.35% | 0.58% | 0.52% | 0.46% | 0.58% | 0.40% | 0.52% | 0.81% |
| 43 | 0.35% | 0.29% | 0.17% | 0.17% | 0.17% | 0.46% | 0.40% | 0.40% | 0.58% | 0.52% | 0.58% | 0.29% | 0.40% | 0.46% | 0.58% | 0.58% |
| 44 | 0.40% | 0.29% | 0.17% | 0.17% | 0.35% | 0.29% | 0.35% | 0.40% | 0.46% | 0.40% | 0.40% | 0.40% | 0.29% | 0.46% | 0.35% | 0.46% |
| 45 | 0.17% | 0.17% | 0.23% | 0.29% | 0.40% | 0.29% | 0.40% | 0.63% | 0.63% | 0.58% | 0.46% | 0.40% | 0.17% | 0.17% | 0.17% | 0.17% |

|    |       |       |       |       |       |       |       |       |       |       |       |       |       |       |       |       |
|----|-------|-------|-------|-------|-------|-------|-------|-------|-------|-------|-------|-------|-------|-------|-------|-------|
| 46 | 0.23% | 0.06% | 0.17% | 0.29% | 0.23% | 0.46% | 0.58% | 0.29% | 0.23% | 0.29% | 0.35% | 0.40% | 0.46% | 0.29% | 0.23% | 0.23% |
| 47 | 0.23% | 0.35% | 0.40% | 0.58% | 0.52% | 0.17% | 0.12% | 0.29% | 0.29% | 0.35% | 0.29% | 0.29% | 0.46% | 0.58% | 0.63% | 0.69% |
| 48 | 0.35% | 0.69% | 0.46% | 0.35% | 0.35% | 0.35% | 0.29% | 0.29% | 0.23% | 0.23% | 0.29% | 0.46% | 0.52% | 0.58% | 0.46% | 0.46% |
| 49 | 0.35% | 0.23% | 0.52% | 0.29% | 0.29% | 0.35% | 0.12% | 0.12% | 0.35% | 0.17% | 0.35% | 0.29% | 0.23% | 0.17% | 0.29% | 0.29% |
| 50 | 0.58% | 0.40% | 0.12% | 0.40% | 0.17% | 0.23% | 0.29% | 0.06% | 0.23% | 0.40% | 0.40% | 0.63% | 0.63% | 0.52% | 0.46% | 0.46% |
| 51 | 0.17% | 0.23% | 0.17% | 0.12% | 0.35% | 0.23% | 0.23% | 0.40% | 0.17% | 0.17% | 0.29% | 0.29% | 0.29% | 0.29% | 0.35% | 0.29% |
| 52 | 0.40% | 0.23% | 0.29% | 0.29% | 0.29% | 0.46% | 0.52% | 0.46% | 0.58% | 0.35% | 0.17% | 0.06% | 0.12% | 0.17% | 0.17% | 0.23% |
| 53 | 0.00% | 0.29% | 0.35% | 0.17% | 0.12% | 0.17% | 0.23% | 0.29% | 0.23% | 0.40% | 0.35% | 0.35% | 0.35% | 0.35% | 0.35% | 0.35% |
| 54 | 0.69% | 0.52% | 0.40% | 0.40% | 0.40% | 0.29% | 0.17% | 0.23% | 0.12% | 0.12% | 0.12% | 0.12% | 0.12% | 0.12% | 0.12% | 0.12% |
| 55 | 0.06% | 0.12% | 0.17% | 0.23% | 0.23% | 0.29% | 0.35% | 0.29% | 0.46% | 0.29% | 0.29% | 0.29% | 0.29% | 0.29% | 0.29% | 0.29% |
| 56 | 0.12% | 0.12% | 0.12% | 0.12% | 0.17% | 0.17% | 0.17% | 0.23% | 0.23% | 0.35% | 0.40% | 0.40% | 0.40% | 0.40% | 0.40% | 0.40% |

(7) Similarity scores with fingerprint FP2

| Order | k=1 | k=2 | k=3 | k=4 | k=5 | k=6 | k=7 | k=8 | k=9 | k=10 | k=11 | k=12 | k=13 | k=14 | k=15 | k=1732 |
|-------|-----|-----|-----|-----|-----|-----|-----|-----|-----|------|------|------|------|------|------|--------|
|-------|-----|-----|-----|-----|-----|-----|-----|-----|-----|------|------|------|------|------|------|--------|

|    |        |        |        |        |        |        |        |        |        |        |        |        |        |        |        |        |
|----|--------|--------|--------|--------|--------|--------|--------|--------|--------|--------|--------|--------|--------|--------|--------|--------|
| 1  | 41.78% | 43.45% | 43.91% | 43.62% | 42.82% | 42.12% | 41.32% | 40.74% | 40.05% | 39.70% | 39.01% | 38.14% | 37.39% | 36.87% | 36.24% | 12.98% |
| 2  | 19.62% | 19.10% | 17.54% | 17.31% | 17.71% | 18.35% | 17.83% | 17.37% | 18.06% | 17.66% | 17.66% | 17.83% | 17.89% | 17.66% | 18.06% | 13.73% |
| 3  | 8.31%  | 7.21%  | 8.94%  | 8.71%  | 9.06%  | 8.54%  | 8.83%  | 9.29%  | 8.54%  | 8.37%  | 8.48%  | 8.89%  | 8.94%  | 8.66%  | 7.85%  | 6.58%  |
| 4  | 5.65%  | 6.46%  | 6.17%  | 6.23%  | 6.00%  | 5.37%  | 5.71%  | 5.94%  | 6.00%  | 5.54%  | 5.60%  | 5.14%  | 5.48%  | 5.83%  | 6.46%  | 13.16% |
| 5  | 4.33%  | 5.37%  | 4.62%  | 5.08%  | 4.96%  | 5.48%  | 5.77%  | 5.83%  | 5.77%  | 6.35%  | 5.94%  | 6.06%  | 5.54%  | 5.48%  | 5.77%  | 6.06%  |
| 6  | 3.00%  | 3.58%  | 3.64%  | 3.81%  | 3.52%  | 4.44%  | 5.54%  | 4.96%  | 5.02%  | 4.67%  | 4.39%  | 4.39%  | 4.50%  | 4.44%  | 3.92%  | 4.33%  |
| 7  | 2.94%  | 2.89%  | 4.10%  | 3.35%  | 3.64%  | 3.46%  | 2.42%  | 3.23%  | 3.17%  | 3.23%  | 3.40%  | 3.46%  | 3.69%  | 3.69%  | 3.75%  | 2.60%  |
| 8  | 2.94%  | 3.12%  | 2.94%  | 3.23%  | 3.00%  | 2.94%  | 2.71%  | 2.71%  | 2.77%  | 3.12%  | 3.52%  | 3.46%  | 3.40%  | 3.58%  | 3.87%  | 3.64%  |
| 9  | 2.31%  | 1.79%  | 2.77%  | 2.31%  | 2.60%  | 2.25%  | 2.42%  | 2.48%  | 2.71%  | 3.06%  | 2.65%  | 2.65%  | 2.08%  | 2.31%  | 2.31%  | 4.44%  |
| 10 | 1.73%  | 2.65%  | 2.31%  | 2.08%  | 2.83%  | 2.77%  | 3.06%  | 2.54%  | 2.31%  | 1.85%  | 2.19%  | 2.37%  | 2.48%  | 2.08%  | 2.08%  | 3.58%  |
| 11 | 1.79%  | 1.79%  | 1.79%  | 2.19%  | 1.56%  | 1.44%  | 1.38%  | 1.10%  | 1.62%  | 1.90%  | 1.85%  | 1.85%  | 2.25%  | 2.60%  | 2.19%  | 5.54%  |
| 12 | 1.90%  | 1.56%  | 1.04%  | 1.67%  | 2.02%  | 1.56%  | 1.79%  | 1.73%  | 1.79%  | 1.67%  | 1.44%  | 1.67%  | 2.02%  | 1.90%  | 1.79%  | 4.90%  |
| 13 | 1.90%  | 1.62%  | 1.79%  | 1.56%  | 1.27%  | 1.67%  | 1.38%  | 1.90%  | 1.90%  | 1.67%  | 1.85%  | 1.73%  | 1.85%  | 1.96%  | 1.96%  | 3.12%  |

|    |       |       |       |       |       |       |       |       |       |       |       |       |       |       |       |       |
|----|-------|-------|-------|-------|-------|-------|-------|-------|-------|-------|-------|-------|-------|-------|-------|-------|
| 14 | 1.96% | 1.50% | 1.21% | 1.33% | 0.98% | 1.04% | 1.21% | 1.38% | 1.33% | 1.96% | 2.02% | 1.73% | 1.50% | 1.50% | 1.73% | 2.19% |
| 15 | 1.33% | 0.98% | 0.81% | 1.44% | 1.33% | 1.27% | 1.21% | 0.81% | 0.81% | 1.27% | 1.67% | 1.67% | 1.67% | 1.62% | 1.73% | 1.85% |
| 16 | 1.50% | 1.38% | 1.38% | 1.73% | 1.04% | 1.15% | 1.10% | 1.62% | 1.90% | 1.38% | 1.38% | 1.33% | 1.04% | 1.04% | 1.21% | 1.90% |
| 17 | 1.44% | 0.87% | 1.27% | 0.87% | 1.44% | 1.38% | 1.21% | 1.33% | 0.98% | 1.10% | 0.92% | 1.15% | 1.27% | 1.21% | 1.10% | 2.37% |
| 18 | 1.79% | 1.33% | 1.04% | 0.69% | 1.38% | 1.44% | 1.62% | 1.27% | 0.92% | 1.15% | 0.87% | 1.04% | 1.15% | 1.27% | 1.56% | 2.31% |
| 19 | 0.75% | 1.50% | 0.92% | 1.38% | 1.21% | 1.15% | 1.04% | 0.75% | 1.04% | 1.15% | 1.38% | 1.27% | 1.44% | 1.10% | 1.04% | 2.02% |
| 20 | 1.04% | 0.98% | 1.10% | 1.27% | 1.15% | 0.92% | 0.92% | 1.10% | 1.21% | 1.15% | 1.21% | 0.98% | 1.38% | 1.56% | 1.50% | 1.56% |
| 21 | 0.98% | 0.81% | 1.15% | 0.69% | 0.81% | 1.33% | 1.21% | 1.15% | 0.75% | 0.92% | 1.38% | 1.56% | 0.75% | 1.21% | 1.38% | 1.44% |
| 22 | 1.50% | 1.27% | 0.92% | 0.75% | 1.15% | 0.87% | 0.98% | 0.75% | 0.69% | 0.81% | 0.69% | 0.69% | 1.15% | 1.10% | 0.87% | 2.08% |
| 23 | 0.92% | 1.27% | 0.87% | 1.15% | 0.87% | 1.15% | 0.92% | 1.21% | 1.33% | 0.75% | 0.92% | 1.04% | 1.15% | 0.69% | 0.63% | 1.73% |
| 24 | 0.75% | 0.75% | 1.04% | 0.87% | 1.10% | 1.15% | 1.21% | 1.10% | 1.27% | 1.10% | 0.63% | 0.92% | 0.46% | 1.04% | 0.92% | 2.02% |
| 25 | 1.10% | 0.63% | 1.10% | 0.87% | 0.69% | 0.75% | 1.15% | 1.38% | 1.15% | 1.10% | 1.04% | 0.46% | 0.87% | 0.75% | 1.33% | 1.67% |
| 26 | 0.81% | 1.04% | 0.69% | 0.52% | 0.98% | 0.81% | 0.75% | 0.69% | 0.87% | 0.98% | 0.98% | 1.15% | 1.15% | 1.15% | 0.87% | 1.44% |

|    |       |       |       |       |       |       |       |       |       |       |       |       |       |       |       |       |
|----|-------|-------|-------|-------|-------|-------|-------|-------|-------|-------|-------|-------|-------|-------|-------|-------|
| 27 | 0.92% | 0.35% | 0.75% | 1.10% | 0.58% | 0.69% | 0.69% | 0.63% | 1.04% | 0.58% | 0.75% | 1.21% | 0.98% | 0.98% | 0.92% | 1.50% |
| 28 | 1.10% | 0.75% | 0.63% | 0.75% | 0.58% | 0.92% | 0.58% | 0.58% | 0.29% | 0.87% | 0.98% | 0.69% | 0.75% | 0.63% | 0.58% | 0.81% |
| 29 | 0.81% | 0.87% | 0.69% | 0.58% | 0.81% | 0.40% | 0.69% | 0.69% | 0.81% | 0.92% | 0.69% | 0.81% | 0.63% | 0.52% | 0.52% | 1.56% |
| 30 | 0.58% | 0.52% | 0.52% | 0.75% | 0.81% | 0.52% | 0.40% | 0.46% | 0.58% | 0.58% | 0.58% | 0.40% | 0.69% | 0.81% | 0.69% | 0.92% |
| 31 | 1.04% | 0.98% | 0.52% | 0.52% | 0.69% | 0.69% | 0.46% | 0.69% | 0.63% | 0.75% | 0.63% | 0.69% | 0.63% | 0.35% | 0.75% | 0.81% |
| 32 | 0.46% | 0.29% | 0.75% | 0.40% | 0.29% | 0.46% | 0.75% | 0.75% | 0.69% | 0.35% | 0.35% | 0.40% | 0.40% | 0.98% | 0.46% | 0.81% |
| 33 | 0.46% | 0.92% | 0.81% | 0.40% | 0.40% | 0.46% | 0.69% | 0.58% | 0.52% | 0.40% | 0.46% | 0.40% | 0.35% | 0.52% | 1.15% | 0.52% |
| 34 | 0.23% | 0.58% | 0.40% | 0.52% | 0.29% | 0.81% | 0.46% | 0.69% | 0.69% | 0.69% | 0.58% | 0.35% | 0.46% | 0.46% | 0.52% | 0.52% |
| 35 | 0.75% | 0.58% | 0.52% | 0.35% | 0.40% | 0.58% | 0.46% | 0.52% | 0.35% | 0.52% | 0.52% | 0.75% | 0.58% | 0.52% | 0.29% | 0.63% |
| 36 | 0.46% | 0.69% | 0.69% | 0.81% | 0.81% | 0.52% | 0.69% | 0.46% | 0.58% | 0.58% | 0.75% | 0.63% | 0.63% | 0.40% | 0.29% | 1.10% |
| 37 | 0.58% | 0.63% | 0.58% | 0.46% | 0.40% | 0.23% | 0.29% | 0.35% | 0.69% | 0.81% | 0.58% | 0.75% | 0.46% | 0.58% | 0.52% | 0.52% |
| 38 | 0.52% | 0.52% | 0.46% | 0.81% | 0.63% | 0.52% | 0.69% | 0.46% | 0.46% | 0.58% | 0.75% | 0.87% | 0.81% | 0.46% | 0.63% | 0.52% |
| 39 | 0.81% | 0.35% | 0.40% | 0.52% | 0.35% | 0.52% | 0.63% | 0.46% | 0.35% | 0.46% | 0.69% | 0.81% | 0.92% | 0.75% | 0.75% | 0.63% |

|    |       |       |       |       |       |       |       |       |       |       |       |       |       |       |       |       |
|----|-------|-------|-------|-------|-------|-------|-------|-------|-------|-------|-------|-------|-------|-------|-------|-------|
| 40 | 0.46% | 0.35% | 0.92% | 0.63% | 0.92% | 0.63% | 0.40% | 0.52% | 0.52% | 0.52% | 0.40% | 0.40% | 0.35% | 0.63% | 0.58% | 0.81% |
| 41 | 0.17% | 0.40% | 0.35% | 0.58% | 0.75% | 0.58% | 0.40% | 0.40% | 0.40% | 0.29% | 0.46% | 0.35% | 0.87% | 0.92% | 0.75% | 0.58% |
| 42 | 0.23% | 0.40% | 0.17% | 0.52% | 0.23% | 0.29% | 0.58% | 0.52% | 0.29% | 0.40% | 0.58% | 0.40% | 0.75% | 0.58% | 0.69% | 0.75% |
| 43 | 0.40% | 0.12% | 0.17% | 0.12% | 0.40% | 0.52% | 0.40% | 0.40% | 0.35% | 0.63% | 0.52% | 0.87% | 0.46% | 0.92% | 1.10% | 0.81% |
| 44 | 0.29% | 0.40% | 0.29% | 0.23% | 0.23% | 0.35% | 0.35% | 0.52% | 0.52% | 0.40% | 0.69% | 0.40% | 0.69% | 0.58% | 0.52% | 0.69% |
| 45 | 0.23% | 0.29% | 0.40% | 0.35% | 0.29% | 0.17% | 0.23% | 0.63% | 0.81% | 0.69% | 0.46% | 0.69% | 0.52% | 0.46% | 0.52% | 0.46% |
| 46 | 0.29% | 0.23% | 0.23% | 0.35% | 0.23% | 0.40% | 0.35% | 0.46% | 0.40% | 0.35% | 0.63% | 0.52% | 0.46% | 0.46% | 0.40% | 0.46% |
| 47 | 0.40% | 0.52% | 0.29% | 0.12% | 0.29% | 0.29% | 0.69% | 0.52% | 0.52% | 0.23% | 0.12% | 0.17% | 0.29% | 0.35% | 0.29% | 0.40% |
| 48 | 0.40% | 0.17% | 0.06% | 0.12% | 0.46% | 0.52% | 0.23% | 0.23% | 0.29% | 0.40% | 0.23% | 0.58% | 0.58% | 0.52% | 0.58% | 0.58% |
| 49 | 0.29% | 0.35% | 0.35% | 0.23% | 0.29% | 0.29% | 0.40% | 0.58% | 0.40% | 0.29% | 0.52% | 0.35% | 0.29% | 0.46% | 0.46% | 0.46% |
| 50 | 0.23% | 0.23% | 0.46% | 0.69% | 0.35% | 0.40% | 0.46% | 0.23% | 0.29% | 0.35% | 0.23% | 0.17% | 0.17% | 0.17% | 0.23% | 0.23% |
| 51 | 0.63% | 0.23% | 0.35% | 0.46% | 0.40% | 0.40% | 0.29% | 0.12% | 0.35% | 0.40% | 0.29% | 0.35% | 0.40% | 0.29% | 0.29% | 0.23% |
| 52 | 0.06% | 0.23% | 0.17% | 0.23% | 0.17% | 0.29% | 0.17% | 0.29% | 0.29% | 0.23% | 0.23% | 0.12% | 0.17% | 0.23% | 0.23% | 0.29% |

|    |       |       |       |       |       |       |       |       |       |       |       |       |       |       |       |       |
|----|-------|-------|-------|-------|-------|-------|-------|-------|-------|-------|-------|-------|-------|-------|-------|-------|
| 53 | 0.52% | 0.35% | 0.40% | 0.17% | 0.35% | 0.12% | 0.17% | 0.35% | 0.23% | 0.40% | 0.46% | 0.35% | 0.29% | 0.23% | 0.17% | 0.17% |
| 54 | 0.29% | 0.58% | 0.46% | 0.46% | 0.35% | 0.46% | 0.63% | 0.40% | 0.46% | 0.40% | 0.40% | 0.46% | 0.52% | 0.58% | 0.63% | 0.63% |
| 55 | 0.46% | 0.52% | 0.17% | 0.17% | 0.29% | 0.29% | 0.17% | 0.29% | 0.23% | 0.29% | 0.23% | 0.23% | 0.17% | 0.17% | 0.17% | 0.17% |
| 56 | 0.17% | 0.06% | 0.29% | 0.23% | 0.17% | 0.17% | 0.17% | 0.17% | 0.35% | 0.35% | 0.46% | 0.52% | 0.52% | 0.52% | 0.52% | 0.52% |

(8) Similarity scores with fingerprint MACCS

| Order | k=1    | k=2    | k=3    | k=4    | k=5    | k=6    | k=7    | k=8    | k=9    | k=10   | k=11   | k=12   | k=13   | k=14   | k=15   | k=1732 |
|-------|--------|--------|--------|--------|--------|--------|--------|--------|--------|--------|--------|--------|--------|--------|--------|--------|
| 1     | 39.99% | 43.39% | 43.39% | 42.53% | 41.32% | 40.05% | 38.78% | 37.74% | 37.28% | 37.10% | 35.72% | 35.31% | 34.05% | 33.70% | 33.53% | 12.46% |
| 2     | 18.35% | 17.14% | 18.23% | 17.48% | 16.85% | 17.20% | 17.43% | 17.60% | 16.91% | 16.04% | 16.10% | 15.46% | 16.56% | 16.68% | 16.68% | 12.64% |
| 3     | 9.17%  | 8.83%  | 8.14%  | 9.06%  | 9.35%  | 8.94%  | 9.06%  | 9.12%  | 8.94%  | 9.06%  | 9.52%  | 9.75%  | 8.66%  | 8.37%  | 8.25%  | 9.75%  |
| 4     | 6.92%  | 5.37%  | 5.25%  | 5.14%  | 5.65%  | 6.46%  | 6.41%  | 6.35%  | 6.35%  | 6.00%  | 6.23%  | 5.94%  | 6.35%  | 6.06%  | 6.17%  | 8.66%  |
| 5     | 4.21%  | 5.60%  | 4.96%  | 5.08%  | 5.14%  | 5.02%  | 5.14%  | 4.85%  | 4.79%  | 5.37%  | 4.90%  | 5.60%  | 5.42%  | 5.37%  | 5.42%  | 8.66%  |
| 6     | 3.17%  | 3.81%  | 3.64%  | 3.92%  | 4.56%  | 4.04%  | 4.96%  | 4.96%  | 5.14%  | 4.56%  | 5.08%  | 4.44%  | 4.39%  | 4.21%  | 4.10%  | 4.79%  |
| 7     | 3.29%  | 3.40%  | 3.87%  | 3.81%  | 4.33%  | 4.62%  | 3.64%  | 4.15%  | 4.56%  | 4.39%  | 3.52%  | 3.87%  | 4.27%  | 4.44%  | 3.81%  | 2.60%  |



|    |       |       |       |       |       |       |       |       |       |       |       |       |       |       |       |       |
|----|-------|-------|-------|-------|-------|-------|-------|-------|-------|-------|-------|-------|-------|-------|-------|-------|
| 8  | 3.75% | 3.23% | 4.10% | 3.69% | 3.64% | 3.06% | 2.94% | 3.00% | 3.29% | 4.33% | 4.79% | 4.10% | 3.58% | 3.81% | 3.52% | 2.14% |
| 9  | 2.71% | 2.94% | 2.83% | 2.89% | 2.60% | 2.65% | 3.00% | 2.77% | 3.46% | 3.23% | 3.40% | 4.10% | 4.50% | 4.04% | 3.87% | 5.14% |
| 10 | 2.19% | 2.48% | 2.19% | 2.83% | 2.60% | 2.94% | 3.29% | 3.81% | 2.89% | 2.48% | 2.89% | 3.12% | 3.29% | 3.46% | 3.87% | 3.58% |
| 11 | 2.71% | 2.83% | 2.48% | 2.02% | 2.31% | 2.37% | 2.42% | 2.37% | 2.54% | 2.31% | 1.96% | 1.73% | 1.73% | 1.67% | 1.96% | 4.73% |
| 12 | 1.79% | 2.08% | 1.90% | 2.31% | 2.08% | 2.08% | 1.96% | 1.73% | 1.73% | 1.67% | 1.67% | 1.73% | 2.14% | 1.85% | 1.67% | 2.94% |
| 13 | 2.08% | 1.56% | 2.14% | 1.85% | 1.67% | 2.02% | 1.56% | 1.56% | 1.50% | 1.85% | 2.19% | 2.31% | 2.02% | 2.25% | 2.37% | 3.35% |
| 14 | 1.90% | 1.90% | 1.67% | 1.96% | 1.67% | 1.79% | 1.44% | 1.85% | 1.27% | 1.79% | 1.90% | 1.90% | 1.85% | 2.25% | 2.02% | 3.06% |
| 15 | 1.50% | 1.27% | 0.92% | 1.38% | 1.44% | 1.04% | 1.79% | 1.27% | 1.90% | 1.67% | 1.27% | 1.62% | 1.67% | 1.67% | 1.73% | 2.54% |
| 16 | 1.38% | 1.27% | 1.50% | 1.79% | 1.73% | 1.96% | 1.44% | 1.38% | 1.62% | 1.56% | 1.38% | 0.98% | 0.69% | 1.21% | 1.21% | 2.83% |
| 17 | 1.33% | 0.63% | 1.90% | 1.33% | 1.10% | 1.73% | 1.50% | 1.50% | 0.81% | 1.33% | 1.27% | 1.67% | 1.79% | 1.33% | 1.33% | 2.31% |
| 18 | 1.27% | 1.15% | 0.69% | 1.27% | 1.79% | 1.38% | 1.50% | 1.79% | 1.56% | 1.44% | 1.62% | 1.38% | 1.15% | 1.33% | 1.56% | 1.73% |
| 19 | 0.87% | 1.27% | 1.21% | 0.75% | 1.21% | 1.10% | 1.62% | 1.33% | 1.96% | 1.15% | 1.27% | 0.98% | 1.10% | 0.98% | 1.10% | 2.02% |
| 20 | 0.92% | 1.10% | 0.58% | 1.10% | 0.81% | 1.27% | 1.04% | 0.81% | 0.81% | 1.04% | 1.04% | 1.44% | 1.62% | 1.15% | 0.92% | 1.90% |

|    |       |       |       |       |       |       |       |       |       |       |       |       |       |       |       |       |
|----|-------|-------|-------|-------|-------|-------|-------|-------|-------|-------|-------|-------|-------|-------|-------|-------|
| 21 | 1.27% | 0.75% | 0.87% | 0.75% | 1.27% | 0.75% | 1.04% | 1.10% | 0.98% | 1.15% | 1.21% | 1.15% | 0.87% | 1.44% | 1.27% | 1.38% |
| 22 | 0.75% | 0.81% | 0.87% | 0.69% | 0.63% | 0.98% | 0.98% | 1.10% | 0.87% | 0.98% | 0.69% | 0.58% | 0.98% | 0.87% | 0.92% | 1.62% |
| 23 | 1.10% | 0.63% | 0.92% | 0.46% | 0.69% | 0.58% | 0.81% | 0.98% | 0.81% | 1.10% | 0.92% | 1.04% | 0.98% | 1.10% | 1.38% | 1.38% |
| 24 | 0.87% | 1.15% | 0.46% | 1.04% | 0.69% | 0.75% | 0.98% | 0.92% | 1.15% | 0.98% | 1.10% | 0.92% | 1.15% | 0.75% | 1.33% | 1.38% |
| 25 | 0.92% | 0.58% | 0.75% | 0.58% | 0.81% | 0.81% | 0.63% | 0.87% | 1.10% | 0.81% | 1.10% | 1.33% | 0.75% | 0.92% | 0.40% | 1.90% |
| 26 | 1.21% | 0.75% | 0.69% | 0.69% | 0.46% | 1.10% | 0.98% | 1.04% | 0.75% | 0.69% | 1.04% | 0.98% | 0.58% | 0.46% | 0.40% | 1.56% |
| 27 | 0.69% | 0.69% | 1.04% | 0.69% | 0.87% | 0.69% | 0.81% | 0.92% | 0.63% | 0.81% | 0.29% | 0.40% | 0.63% | 0.52% | 0.69% | 1.38% |
| 28 | 0.92% | 0.58% | 0.69% | 0.46% | 0.52% | 0.46% | 0.75% | 0.35% | 0.69% | 0.69% | 0.52% | 0.58% | 0.35% | 0.63% | 0.58% | 1.38% |
| 29 | 0.69% | 0.81% | 0.63% | 0.69% | 0.75% | 0.40% | 0.12% | 0.35% | 0.40% | 0.52% | 0.75% | 0.46% | 0.92% | 0.58% | 0.35% | 1.27% |
| 30 | 0.69% | 0.69% | 0.46% | 0.29% | 0.40% | 0.23% | 0.35% | 0.40% | 0.63% | 0.63% | 0.63% | 0.69% | 0.58% | 0.69% | 0.87% | 0.58% |
| 31 | 0.63% | 1.21% | 0.46% | 0.81% | 0.29% | 0.12% | 0.12% | 0.23% | 0.58% | 0.40% | 0.58% | 0.75% | 0.81% | 0.92% | 0.87% | 0.81% |
| 32 | 0.69% | 0.35% | 0.46% | 0.40% | 0.17% | 0.40% | 0.17% | 0.46% | 0.35% | 0.23% | 0.46% | 0.23% | 0.69% | 0.63% | 1.10% | 1.04% |
| 33 | 0.69% | 0.69% | 0.40% | 0.35% | 0.17% | 0.46% | 0.52% | 0.35% | 0.35% | 0.40% | 0.40% | 0.46% | 0.40% | 0.58% | 0.46% | 1.04% |

|    |       |       |       |       |       |       |       |       |       |       |       |       |       |       |       |       |
|----|-------|-------|-------|-------|-------|-------|-------|-------|-------|-------|-------|-------|-------|-------|-------|-------|
| 34 | 0.29% | 0.35% | 0.58% | 0.29% | 0.52% | 0.46% | 0.40% | 0.29% | 0.35% | 0.69% | 0.69% | 0.58% | 0.52% | 0.81% | 0.46% | 1.27% |
| 35 | 0.35% | 0.52% | 0.63% | 0.52% | 0.46% | 0.46% | 0.58% | 0.63% | 0.58% | 0.58% | 0.29% | 0.81% | 1.10% | 0.81% | 1.15% | 1.15% |
| 36 | 0.52% | 0.40% | 0.40% | 0.40% | 0.23% | 0.35% | 0.35% | 0.69% | 0.58% | 0.40% | 0.63% | 0.92% | 0.35% | 0.75% | 0.75% | 0.35% |
| 37 | 0.63% | 0.29% | 0.35% | 0.40% | 0.58% | 0.58% | 0.81% | 0.17% | 0.29% | 0.75% | 0.75% | 0.52% | 0.52% | 0.75% | 0.81% | 1.10% |
| 38 | 0.52% | 0.29% | 0.40% | 0.46% | 0.40% | 0.52% | 0.40% | 0.75% | 0.69% | 0.92% | 0.46% | 0.52% | 1.44% | 0.92% | 1.10% | 1.10% |
| 39 | 0.46% | 0.35% | 0.23% | 0.58% | 0.75% | 0.23% | 0.40% | 0.58% | 0.92% | 0.63% | 0.63% | 0.46% | 0.52% | 0.81% | 0.63% | 0.52% |
| 40 | 0.52% | 0.52% | 0.69% | 0.40% | 0.58% | 0.63% | 0.63% | 0.46% | 0.23% | 0.58% | 1.21% | 0.92% | 0.52% | 0.69% | 0.58% | 0.75% |
| 41 | 0.23% | 0.35% | 0.35% | 0.63% | 0.29% | 0.63% | 0.35% | 0.17% | 0.52% | 0.52% | 0.40% | 0.29% | 0.40% | 0.29% | 0.58% | 0.81% |
| 42 | 0.00% | 0.17% | 0.35% | 0.52% | 0.40% | 0.35% | 0.40% | 0.81% | 0.58% | 0.23% | 0.40% | 0.58% | 0.40% | 0.35% | 0.40% | 0.35% |
| 43 | 0.29% | 0.29% | 0.46% | 0.40% | 0.40% | 0.52% | 0.58% | 0.35% | 0.12% | 0.46% | 0.52% | 0.58% | 0.52% | 0.52% | 0.35% | 0.46% |
| 44 | 0.40% | 0.29% | 0.23% | 0.17% | 0.52% | 0.40% | 0.29% | 0.29% | 0.40% | 0.29% | 0.52% | 0.40% | 0.46% | 0.52% | 0.58% | 0.63% |
| 45 | 0.35% | 0.35% | 0.12% | 0.35% | 0.40% | 0.40% | 0.52% | 0.46% | 0.40% | 0.29% | 0.23% | 0.58% | 0.58% | 0.58% | 0.58% | 0.46% |
| 46 | 0.23% | 0.29% | 0.23% | 0.35% | 0.40% | 0.35% | 0.46% | 0.40% | 0.35% | 0.23% | 0.23% | 0.35% | 0.58% | 0.52% | 0.40% | 0.35% |

|    |       |       |       |       |       |       |       |       |       |       |       |       |       |       |       |       |
|----|-------|-------|-------|-------|-------|-------|-------|-------|-------|-------|-------|-------|-------|-------|-------|-------|
| 47 | 0.35% | 0.17% | 0.17% | 0.06% | 0.29% | 0.46% | 0.35% | 0.35% | 0.52% | 0.29% | 0.23% | 0.35% | 0.40% | 0.63% | 0.52% | 0.58% |
| 48 | 0.23% | 0.35% | 0.40% | 0.52% | 0.29% | 0.23% | 0.29% | 0.35% | 0.06% | 0.46% | 0.40% | 0.29% | 0.40% | 0.35% | 0.75% | 0.87% |
| 49 | 0.40% | 0.12% | 0.23% | 0.12% | 0.17% | 0.12% | 0.17% | 0.29% | 0.46% | 0.46% | 0.52% | 0.29% | 0.35% | 0.46% | 0.23% | 0.23% |
| 50 | 0.23% | 0.58% | 0.52% | 0.23% | 0.29% | 0.40% | 0.23% | 0.29% | 0.46% | 0.69% | 0.69% | 0.69% | 0.40% | 0.17% | 0.23% | 0.23% |
| 51 | 0.29% | 0.40% | 0.29% | 0.52% | 0.46% | 0.35% | 0.52% | 0.52% | 0.46% | 0.17% | 0.40% | 0.46% | 0.46% | 0.29% | 0.29% | 0.29% |
| 52 | 0.35% | 0.35% | 0.35% | 0.23% | 0.29% | 0.40% | 0.35% | 0.40% | 0.29% | 0.35% | 0.12% | 0.12% | 0.29% | 0.52% | 0.52% | 0.46% |
| 53 | 0.52% | 0.46% | 0.12% | 0.35% | 0.23% | 0.29% | 0.35% | 0.12% | 0.23% | 0.40% | 0.40% | 0.52% | 0.29% | 0.29% | 0.35% | 0.46% |
| 54 | 0.12% | 0.06% | 0.52% | 0.29% | 0.23% | 0.23% | 0.17% | 0.23% | 0.63% | 0.58% | 0.52% | 0.29% | 0.46% | 0.52% | 0.52% | 0.52% |
| 55 | 0.23% | 0.29% | 0.29% | 0.35% | 0.46% | 0.46% | 0.52% | 0.63% | 0.40% | 0.40% | 0.40% | 0.58% | 0.52% | 0.52% | 0.52% | 0.52% |
| 56 | 0.17% | 0.17% | 0.12% | 0.12% | 0.12% | 0.06% | 0.06% | 0.12% | 0.23% | 0.17% | 0.23% | 0.23% | 0.35% | 0.35% | 0.35% | 0.35% |
