# Supplementary material for: Prediction of Drug Indications Based on Chemical Interactions and Chemical Similarities
Source: Hindawi journal article supplement (doi:10.1155/2015/584546), 2015-01-01
Supplement: f1 [file 584546.f1.zip]

**Supplementary Material VIII.** The prediction accuracies obtained by methods based on chemical interactions, chemical similarities and integrated scores on  $DS^{(i)}$  evaluated by jackknife test.

| Prediction order | Prediction based on chemical interactions ( $k=5$ ) (%) | Prediction based on chemical similarities (ECFP4, $k=2$ ) (%) | Prediction based on integrated scores (%) |
|------------------|---------------------------------------------------------|---------------------------------------------------------------|-------------------------------------------|
| 1                | 58.48                                                   | 42.52                                                         | 58.82                                     |
| 2                | 22.88                                                   | 18.19                                                         | 23.44                                     |
| 3                | 7.92                                                    | 8.59                                                          | 8.37                                      |
| 4                | 5.58                                                    | 6.36                                                          | 5.58                                      |
| 5                | 3.79                                                    | 3.35                                                          | 4.46                                      |
| 6                | 2.01                                                    | 4.24                                                          | 2.90                                      |
| 7                | 1.90                                                    | 3.46                                                          | 2.46                                      |
| 8                | 2.23                                                    | 3.35                                                          | 2.68                                      |
| 9                | 1.56                                                    | 2.46                                                          | 2.23                                      |
| 10               | 1.12                                                    | 1.79                                                          | 1.56                                      |
| 11               | 1.00                                                    | 2.46                                                          | 1.00                                      |
| 12               | 0.67                                                    | 1.00                                                          | 1.23                                      |
| 13               | 1.45                                                    | 2.12                                                          | 0.78                                      |
| 14               | 0.78                                                    | 1.79                                                          | 1.00                                      |
| 15               | 0.45                                                    | 1.45                                                          | 0.45                                      |
| 16               | 0.22                                                    | 2.01                                                          | 1.00                                      |
| 17               | 1.23                                                    | 1.34                                                          | 1.23                                      |
| 18               | 0.33                                                    | 1.23                                                          | 0.56                                      |
| 19               | 1.00                                                    | 1.12                                                          | 0.33                                      |
| 20               | 1.12                                                    | 1.23                                                          | 0.89                                      |
| 21               | 0.56                                                    | 1.45                                                          | 0.56                                      |
| 22               | 1.34                                                    | 1.56                                                          | 0.67                                      |
| 23               | 0.89                                                    | 1.00                                                          | 0.56                                      |
| 24               | 0.45                                                    | 1.00                                                          | 0.56                                      |
| 25               | 0.78                                                    | 1.23                                                          | 0.67                                      |
| 26               | 0.89                                                    | 0.89                                                          | 0.00                                      |
| 27               | 0.45                                                    | 0.89                                                          | 0.22                                      |

|    |      |      |      |
|----|------|------|------|
| 28 | 0.56 | 0.67 | 0.33 |
| 29 | 0.33 | 0.22 | 0.11 |
| 30 | 0.89 | 0.78 | 0.22 |
| 31 | 0.11 | 0.56 | 0.22 |
| 32 | 0.45 | 1.23 | 0.33 |
| 33 | 0.67 | 0.11 | 0.22 |
| 34 | 0.33 | 0.56 | 0.11 |
| 35 | 0.33 | 1.12 | 0.56 |
| 36 | 0.56 | 0.33 | 0.56 |
| 37 | 0.78 | 0.33 | 0.56 |
| 38 | 0.11 | 0.33 | 0.11 |
| 39 | 0.45 | 0.33 | 0.11 |
| 40 | 0.33 | 0.45 | 0.00 |
| 41 | 0.33 | 0.33 | 0.11 |
| 42 | 0.33 | 0.45 | 0.22 |
| 43 | 0.33 | 0.78 | 0.22 |
| 44 | 0.33 | 0.45 | 0.33 |
| 45 | 0.56 | 0.56 | 0.45 |
| 46 | 0.67 | 0.33 | 0.11 |
| 47 | 0.11 | 0.33 | 0.33 |
| 48 | 0.33 | 0.11 | 0.11 |
| 49 | 0.00 | 0.22 | 0.22 |
| 50 | 0.11 | 0.45 | 0.22 |
| 51 | 0.56 | 0.78 | 0.45 |
| 52 | 0.11 | 0.22 | 0.11 |
| 53 | 0.33 | 0.78 | 0.45 |
| 54 | 0.22 | 0.33 | 0.22 |
| 55 | 0.00 | 0.11 | 0.11 |
| 56 | 0.11 | 0.11 | 0.11 |
