# Supplementary material for: Prediction of Drug Indications Based on Chemical Interactions and Chemical Similarities
Source: Hindawi journal article supplement (doi:10.1155/2015/584546), 2015-01-01
Supplement: f1 [file 584546.f1.zip]

[illegible]

[illegible]

[illegible]

[illegible]
