# Supplementary material for: Prediction of Drug Indications Based on Chemical Interactions and Chemical Similarities
Source: Hindawi journal article supplement (doi:10.1155/2015/584546), 2015-01-01
Supplement: f1 [file 584546.f1.zip]

**Supplementary Material II.** The number of drug samples in each category for dataset  $DS_2$ .

| Tag      | Disease           | Number of drugs |
|----------|-------------------|-----------------|
| $D_1$    | Antihypertensive  | 127             |
| $D_2$    | Uterine stimulant | 7               |
| $D_3$    | Antithrombotic    | 47              |
| $D_4$    | Radioactive agent | 7               |
| $D_5$    | Pharmaceutic aid  | 19              |
| $D_6$    | Antiarrhythmic    | 30              |
| $D_7$    | Vasodilator       | 47              |
| $D_8$    | Laxative          | 9               |
| $D_9$    | Diagnostic aid    | 15              |
| $D_{10}$ | Antiviral         | 46              |
| $D_{11}$ | Nutrient          | 14              |
| $D_{12}$ | Antineoplastic    | 193             |
| $D_{13}$ | Antipsoriatic     | 17              |
| $D_{14}$ | Vasoconstrictor   | 13              |
| $D_{15}$ | Anthelmintic      | 22              |
| $D_{16}$ | Antimalarial      | 14              |
| $D_{17}$ | Antifungal        | 44              |
| $D_{18}$ | Hypolipidemic     | 37              |
| $D_{19}$ | Antibacterial     | 86              |
| $D_{20}$ | Antibiotic        | 108             |

|          |                          |     |
|----------|--------------------------|-----|
| $D_{21}$ | Choleretic               | 9   |
| $D_{22}$ | Antiinflammatory         | 107 |
| $D_{23}$ | Immunomodulator          | 19  |
| $D_{24}$ | Muscle relaxant          | 24  |
| $D_{25}$ | Analgesic                | 131 |
| $D_{26}$ | Disinfectant             | 22  |
| $D_{27}$ | Diuretic                 | 23  |
| $D_{28}$ | Anticonvulsant           | 31  |
| $D_{29}$ | Antidepressant           | 91  |
| $D_{30}$ | Antioxidant              | 13  |
| $D_{31}$ | Antiparkinsonian         | 34  |
| $D_{32}$ | Antiulcerative           | 14  |
| $D_{33}$ | CNS stimulant            | 16  |
| $D_{34}$ | Antipsychotic            | 92  |
| $D_{35}$ | Antianginal              | 20  |
| $D_{36}$ | Cognition enhancer       | 10  |
| $D_{37}$ | Antidiabetic             | 46  |
| $D_{38}$ | Psychodysleptic          | 9   |
| $D_{39}$ | Anxiolytic               | 59  |
| $D_{40}$ | Anti-Alzheimer's Disease | 17  |
| $D_{41}$ | Antiemetic               | 27  |
| $D_{42}$ | Antihistamine            | 44  |

|          |                            |       |
|----------|----------------------------|-------|
| $D_{43}$ | Cardiotonic                | 23    |
| $D_{44}$ | Antiglaucoma               | 13    |
| $D_{45}$ | Antiallergic/Antiasthmatic | 70    |
| $D_{46}$ | Hypocholesterolemic        | 12    |
| $D_{47}$ | Uricosuric                 | 9     |
| $D_{48}$ | Sedative/Hypnotic          | 16    |
| $D_{49}$ | Anesthetic                 | 13    |
| $D_{50}$ | Antiamoebic                | 7     |
| $D_{51}$ | Spasmolytic                | 29    |
| $D_{52}$ | Antianorexic               | 11    |
| $D_{53}$ | Antiatherosclerotic        | 13    |
| $D_{54}$ | Antisecretory (gastric)    | 8     |
| $D_{55}$ | Antiobesity                | 14    |
| $D_{56}$ | Narcotic antagonist        | 7     |
| Total    | ---                        | 2,005 |
