# Supplementary material for: Prediction of Drug Indications Based on Chemical Interactions and Chemical Similarities
Source: Hindawi journal article supplement (doi:10.1155/2015/584546), 2015-01-01
Supplement: f1 [file 584546.f1.zip]

**Supplementary Material IX.** The prediction accuracies obtained by three methods on  $DS^{(i)}$ ,  $DS^{(s)}$ ,  $DS_2$ , evaluated by jackknife test.

| Order | The integrated method on $DS_2$ (%) | The method based on chemical interactions on $DS^{(i)}$ (%) | The method based on chemical similarities on $DS^{(s)}$ (%) |
|-------|-------------------------------------|-------------------------------------------------------------|-------------------------------------------------------------|
| 1     | 53.66                               | 58.48                                                       | 47.27                                                       |
| 2     | 18.69                               | 22.88                                                       | 13.15                                                       |
| 3     | 7.44                                | 7.92                                                        | 6.79                                                        |
| 4     | 5.40                                | 5.58                                                        | 5.17                                                        |
| 5     | 3.69                                | 3.79                                                        | 3.55                                                        |
| 6     | 3.05                                | 2.01                                                        | 4.43                                                        |
| 7     | 2.54                                | 1.90                                                        | 3.40                                                        |
| 8     | 1.84                                | 2.23                                                        | 1.33                                                        |
| 9     | 2.10                                | 1.56                                                        | 2.81                                                        |
| 10    | 1.34                                | 1.12                                                        | 1.62                                                        |
| 11    | 1.53                                | 1.00                                                        | 2.22                                                        |
| 12    | 1.02                                | 0.67                                                        | 1.48                                                        |
| 13    | 1.40                                | 1.45                                                        | 1.33                                                        |
| 14    | 1.21                                | 0.78                                                        | 1.77                                                        |
| 15    | 1.08                                | 0.45                                                        | 1.92                                                        |
| 16    | 1.02                                | 0.22                                                        | 2.07                                                        |
| 17    | 1.21                                | 1.23                                                        | 1.18                                                        |
| 18    | 0.45                                | 0.33                                                        | 0.59                                                        |
| 19    | 0.64                                | 1.00                                                        | 0.15                                                        |
| 20    | 0.89                                | 1.12                                                        | 0.59                                                        |

|    |      |      |      |
|----|------|------|------|
| 21 | 1.08 | 0.56 | 1.77 |
| 22 | 1.34 | 1.34 | 1.33 |
| 23 | 1.02 | 0.89 | 1.18 |
| 24 | 0.38 | 0.45 | 0.30 |
| 25 | 0.64 | 0.78 | 0.44 |
| 26 | 0.95 | 0.89 | 1.03 |
| 27 | 0.76 | 0.45 | 1.18 |
| 28 | 0.57 | 0.56 | 0.59 |
| 29 | 0.51 | 0.33 | 0.74 |
| 30 | 0.64 | 0.89 | 0.30 |
| 31 | 0.19 | 0.11 | 0.30 |
| 32 | 0.70 | 0.45 | 1.03 |
| 33 | 0.57 | 0.67 | 0.44 |
| 34 | 0.25 | 0.33 | 0.15 |
| 35 | 0.32 | 0.33 | 0.30 |
| 36 | 0.45 | 0.56 | 0.30 |
| 37 | 0.76 | 0.78 | 0.74 |
| 38 | 0.25 | 0.11 | 0.44 |
| 39 | 0.45 | 0.45 | 0.44 |
| 40 | 0.25 | 0.33 | 0.15 |
| 41 | 0.51 | 0.33 | 0.74 |
| 42 | 0.32 | 0.33 | 0.30 |

|    |      |      |      |
|----|------|------|------|
| 43 | 0.38 | 0.33 | 0.44 |
| 44 | 0.64 | 0.33 | 1.03 |
| 45 | 0.57 | 0.56 | 0.59 |
| 46 | 0.45 | 0.67 | 0.15 |
| 47 | 0.06 | 0.11 | 0.00 |
| 48 | 0.25 | 0.33 | 0.15 |
| 49 | 0.25 | 0.00 | 0.59 |
| 50 | 0.25 | 0.11 | 0.44 |
| 51 | 0.38 | 0.56 | 0.15 |
| 52 | 0.06 | 0.11 | 0.00 |
| 53 | 0.38 | 0.33 | 0.44 |
| 54 | 0.38 | 0.22 | 0.59 |
| 55 | 0.13 | 0.00 | 0.30 |
| 56 | 0.19 | 0.11 | 0.30 |
