# Supplementary material for: Prediction of Drug Indications Based on Chemical Interactions and Chemical Similarities
Source: Hindawi journal article supplement (doi:10.1155/2015/584546), 2015-01-01
Supplement: f1 [file 584546.f1.zip]

**Supplementary Material VI.** The prediction accuracies obtained by three methods on  $DS^{(i)}$ ,  $DS^{(s)}$ ,  $DS_2$ , evaluated by 5-fold cross-validation.

(1) The prediction accuracies obtained by the method based on chemical interactions on  $DS^{(i)}$

| Order | First time (%) | Second time (%) | Third time (%) | Fourth time (%) | Fifth time (%) | Mean (%) | Standard deviation (%) |
|-------|----------------|-----------------|----------------|-----------------|----------------|----------|------------------------|
| 1     | 56.37          | 55.95           | 57.31          | 57.47           | 57.92          | 57.00    | 0.82                   |
| 2     | 21.98          | 24.01           | 22.03          | 22.17           | 22.35          | 22.51    | 0.85                   |
| 3     | 8.91           | 7.25            | 8.90           | 6.90            | 6.84           | 7.76     | 1.06                   |
| 4     | 5.98           | 5.32            | 4.22           | 5.77            | 5.25           | 5.31     | 0.68                   |
| 5     | 3.16           | 4.19            | 4.11           | 4.41            | 4.56           | 4.09     | 0.55                   |
| 6     | 2.59           | 2.49            | 2.40           | 2.04            | 1.94           | 2.29     | 0.29                   |
| 7     | 1.47           | 2.38            | 2.51           | 2.49            | 2.51           | 2.27     | 0.45                   |
| 8     | 1.69           | 1.47            | 1.26           | 1.36            | 1.60           | 1.47     | 0.18                   |
| 9     | 2.37           | 1.13            | 1.48           | 1.36            | 1.25           | 1.52     | 0.49                   |
| 10    | 0.68           | 1.02            | 1.48           | 1.02            | 0.91           | 1.02     | 0.29                   |
| 11    | 1.24           | 1.25            | 0.80           | 1.24            | 0.91           | 1.09     | 0.22                   |
| 12    | 1.01           | 1.02            | 1.37           | 1.13            | 1.37           | 1.18     | 0.18                   |
| 13    | 1.35           | 1.25            | 1.03           | 1.24            | 1.14           | 1.20     | 0.12                   |
| 14    | 0.90           | 0.45            | 0.57           | 0.68            | 0.57           | 0.63     | 0.17                   |
| 15    | 0.56           | 0.57            | 0.91           | 0.79            | 0.68           | 0.70     | 0.15                   |
| 16    | 0.68           | 0.79            | 0.46           | 0.23            | 0.57           | 0.54     | 0.22                   |
| 17    | 1.13           | 0.79            | 0.68           | 1.24            | 0.46           | 0.86     | 0.32                   |
| 18    | 0.90           | 0.79            | 0.23           | 1.13            | 0.57           | 0.72     | 0.34                   |

|    |      |      |      |      |      |      |      |
|----|------|------|------|------|------|------|------|
| 19 | 1.13 | 0.57 | 0.91 | 1.02 | 0.68 | 0.86 | 0.23 |
| 20 | 0.56 | 1.36 | 1.26 | 0.68 | 1.14 | 1.00 | 0.36 |
| 21 | 1.01 | 0.68 | 0.68 | 0.79 | 0.80 | 0.79 | 0.14 |
| 22 | 1.24 | 1.25 | 1.37 | 1.24 | 1.14 | 1.25 | 0.08 |
| 23 | 1.13 | 1.02 | 0.68 | 0.90 | 0.91 | 0.93 | 0.16 |
| 24 | 0.45 | 0.45 | 0.34 | 0.34 | 0.57 | 0.43 | 0.10 |
| 25 | 1.01 | 1.36 | 0.57 | 1.02 | 1.03 | 1.00 | 0.28 |
| 26 | 0.79 | 1.02 | 1.26 | 1.24 | 1.25 | 1.11 | 0.21 |
| 27 | 0.56 | 0.68 | 0.34 | 0.79 | 0.46 | 0.57 | 0.18 |
| 28 | 0.56 | 0.45 | 0.46 | 0.68 | 0.34 | 0.50 | 0.13 |
| 29 | 0.34 | 0.91 | 0.46 | 0.57 | 0.68 | 0.59 | 0.22 |
| 30 | 0.79 | 0.57 | 0.80 | 0.45 | 0.57 | 0.64 | 0.15 |
| 31 | 0.00 | 0.11 | 0.11 | 0.00 | 0.23 | 0.09 | 0.10 |
| 32 | 0.45 | 0.79 | 0.46 | 0.34 | 0.80 | 0.57 | 0.21 |
| 33 | 0.68 | 0.45 | 0.46 | 0.57 | 0.57 | 0.54 | 0.09 |
| 34 | 0.34 | 0.23 | 0.68 | 0.34 | 0.68 | 0.45 | 0.21 |
| 35 | 0.45 | 0.57 | 0.57 | 0.45 | 0.34 | 0.48 | 0.10 |
| 36 | 0.45 | 0.45 | 0.80 | 0.57 | 1.03 | 0.66 | 0.25 |
| 37 | 0.68 | 0.79 | 0.34 | 0.68 | 0.34 | 0.57 | 0.21 |
| 38 | 0.11 | 0.11 | 0.34 | 0.23 | 0.23 | 0.20 | 0.10 |
| 39 | 0.45 | 0.45 | 0.46 | 0.57 | 0.68 | 0.52 | 0.10 |
| 40 | 0.45 | 0.45 | 0.57 | 0.45 | 0.46 | 0.48 | 0.05 |

|    |      |      |      |      |      |      |      |
|----|------|------|------|------|------|------|------|
| 41 | 0.23 | 0.34 | 0.34 | 0.34 | 0.34 | 0.32 | 0.05 |
| 42 | 0.34 | 0.34 | 0.57 | 0.79 | 0.46 | 0.50 | 0.19 |
| 43 | 0.34 | 0.23 | 0.68 | 0.11 | 0.34 | 0.34 | 0.21 |
| 44 | 0.45 | 0.45 | 0.34 | 0.34 | 0.34 | 0.39 | 0.06 |
| 45 | 0.45 | 0.79 | 0.80 | 0.68 | 0.68 | 0.68 | 0.14 |
| 46 | 0.56 | 0.57 | 0.46 | 0.57 | 0.46 | 0.52 | 0.06 |
| 47 | 0.23 | 0.23 | 0.34 | 0.11 | 0.34 | 0.25 | 0.10 |
| 48 | 0.34 | 0.34 | 0.34 | 0.34 | 0.23 | 0.32 | 0.05 |
| 49 | 0.11 | 0.11 | 0.00 | 0.00 | 0.00 | 0.05 | 0.06 |
| 50 | 0.23 | 0.11 | 0.23 | 0.11 | 0.57 | 0.25 | 0.19 |
| 51 | 0.90 | 0.45 | 0.68 | 0.79 | 0.68 | 0.70 | 0.17 |
| 52 | 0.23 | 0.23 | 0.11 | 0.11 | 0.23 | 0.18 | 0.06 |
| 53 | 0.34 | 0.34 | 0.34 | 0.45 | 0.34 | 0.36 | 0.05 |
| 54 | 0.23 | 0.23 | 0.23 | 0.23 | 0.23 | 0.23 | 0.00 |
| 55 | 0.00 | 0.00 | 0.23 | 0.00 | 0.00 | 0.05 | 0.10 |
| 56 | 0.00 | 0.11 | 0.11 | 0.11 | 0.11 | 0.09 | 0.05 |

(2) The prediction accuracies obtained by the method based on chemical similarities on  $DS^{(s)}$

| Order | First time (%) | Second time (%) | Third time (%) | Fourth time (%) | Fifth time (%) | Mean (%) | Standard deviation (%) |
|-------|----------------|-----------------|----------------|-----------------|----------------|----------|------------------------|
| 1     | 44.17          | 43.62           | 43.90          | 45.86           | 44.68          | 44.45    | 0.88                   |
| 2     | 13.41          | 12.90           | 11.62          | 12.77           | 13.51          | 12.84    | 0.75                   |
| 3     | 6.85           | 5.94            | 8.18           | 6.39            | 5.89           | 6.65     | 0.94                   |
| 4     | 5.54           | 6.67            | 4.73           | 5.22            | 6.90           | 5.81     | 0.93                   |

|    |      |      |      |      |      |      |      |
|----|------|------|------|------|------|------|------|
| 5  | 4.52 | 4.06 | 5.45 | 3.92 | 4.45 | 4.48 | 0.60 |
| 6  | 2.19 | 3.33 | 3.87 | 4.64 | 3.02 | 3.41 | 0.92 |
| 7  | 3.64 | 3.33 | 2.30 | 2.90 | 2.73 | 2.98 | 0.53 |
| 8  | 1.90 | 1.74 | 3.16 | 1.31 | 3.16 | 2.25 | 0.86 |
| 9  | 2.77 | 2.75 | 2.30 | 2.32 | 1.58 | 2.34 | 0.48 |
| 10 | 2.48 | 3.48 | 1.43 | 1.74 | 1.44 | 2.11 | 0.87 |
| 11 | 2.04 | 1.45 | 1.72 | 1.16 | 2.44 | 1.76 | 0.50 |
| 12 | 2.19 | 2.61 | 2.01 | 2.76 | 1.44 | 2.20 | 0.52 |
| 13 | 2.33 | 1.74 | 2.58 | 2.03 | 1.29 | 2.00 | 0.50 |
| 14 | 2.19 | 2.17 | 2.73 | 1.31 | 2.30 | 2.14 | 0.52 |
| 15 | 0.44 | 1.88 | 1.15 | 1.60 | 1.58 | 1.33 | 0.56 |
| 16 | 1.02 | 1.16 | 0.72 | 1.16 | 1.15 | 1.04 | 0.19 |
| 17 | 0.87 | 0.87 | 1.29 | 1.02 | 1.15 | 1.04 | 0.18 |
| 18 | 0.87 | 1.16 | 1.29 | 1.02 | 0.72 | 1.01 | 0.23 |
| 19 | 1.60 | 1.01 | 1.87 | 1.31 | 1.01 | 1.36 | 0.37 |
| 20 | 1.60 | 0.72 | 0.72 | 1.02 | 1.29 | 1.07 | 0.38 |
| 21 | 0.73 | 1.30 | 0.86 | 1.74 | 1.15 | 1.16 | 0.40 |
| 22 | 1.31 | 0.43 | 1.00 | 1.45 | 0.57 | 0.96 | 0.44 |
| 23 | 1.17 | 1.01 | 0.86 | 0.58 | 1.44 | 1.01 | 0.32 |
| 24 | 0.58 | 0.58 | 0.86 | 0.73 | 1.15 | 0.78 | 0.24 |
| 25 | 1.46 | 1.16 | 1.00 | 0.58 | 0.43 | 0.93 | 0.42 |
| 26 | 0.73 | 0.43 | 0.72 | 0.44 | 1.44 | 0.75 | 0.41 |

|    |      |      |      |      |      |      |      |
|----|------|------|------|------|------|------|------|
| 27 | 0.87 | 0.87 | 0.72 | 0.87 | 0.29 | 0.72 | 0.25 |
| 28 | 1.02 | 0.58 | 0.72 | 0.15 | 0.57 | 0.61 | 0.32 |
| 29 | 0.73 | 0.58 | 0.57 | 1.02 | 0.43 | 0.67 | 0.22 |
| 30 | 0.44 | 0.72 | 0.86 | 0.29 | 0.57 | 0.58 | 0.23 |
| 31 | 0.44 | 0.43 | 0.86 | 0.44 | 0.72 | 0.58 | 0.20 |
| 32 | 0.44 | 0.72 | 0.00 | 0.00 | 0.43 | 0.32 | 0.31 |
| 33 | 0.29 | 0.72 | 1.00 | 0.29 | 0.29 | 0.52 | 0.33 |
| 34 | 0.58 | 0.29 | 1.00 | 0.29 | 0.29 | 0.49 | 0.31 |
| 35 | 0.44 | 0.29 | 0.14 | 0.29 | 0.29 | 0.29 | 0.10 |
| 36 | 0.29 | 0.29 | 0.43 | 1.16 | 0.57 | 0.55 | 0.36 |
| 37 | 0.87 | 0.43 | 0.72 | 0.73 | 0.43 | 0.64 | 0.20 |
| 38 | 0.29 | 0.29 | 0.43 | 1.16 | 0.43 | 0.52 | 0.36 |
| 39 | 0.58 | 0.72 | 0.57 | 0.58 | 0.43 | 0.58 | 0.10 |
| 40 | 0.44 | 1.16 | 1.15 | 1.02 | 0.72 | 0.90 | 0.31 |
| 41 | 0.44 | 0.29 | 0.14 | 0.44 | 0.86 | 0.43 | 0.27 |
| 42 | 0.29 | 0.43 | 0.14 | 0.29 | 0.57 | 0.35 | 0.16 |
| 43 | 0.73 | 0.58 | 0.14 | 0.58 | 1.15 | 0.64 | 0.36 |
| 44 | 0.44 | 0.43 | 0.43 | 0.58 | 0.29 | 0.43 | 0.10 |
| 45 | 0.29 | 0.14 | 0.14 | 0.29 | 0.14 | 0.20 | 0.08 |
| 46 | 0.29 | 0.43 | 0.29 | 0.29 | 0.57 | 0.38 | 0.13 |
| 47 | 0.29 | 0.43 | 0.14 | 0.87 | 0.43 | 0.43 | 0.27 |
| 48 | 0.29 | 0.43 | 0.43 | 0.29 | 0.14 | 0.32 | 0.12 |

|    |      |      |      |      |      |      |      |
|----|------|------|------|------|------|------|------|
| 49 | 0.29 | 0.29 | 0.14 | 0.29 | 0.29 | 0.26 | 0.07 |
| 50 | 0.00 | 0.58 | 0.57 | 0.15 | 0.57 | 0.37 | 0.28 |
| 51 | 0.44 | 0.43 | 0.29 | 0.29 | 0.29 | 0.35 | 0.08 |
| 52 | 0.44 | 0.43 | 0.29 | 0.29 | 0.72 | 0.43 | 0.18 |
| 53 | 0.29 | 0.14 | 0.29 | 0.58 | 0.72 | 0.40 | 0.24 |
| 54 | 0.73 | 0.58 | 0.57 | 0.73 | 0.43 | 0.61 | 0.12 |
| 55 | 0.44 | 0.72 | 0.57 | 0.73 | 0.43 | 0.58 | 0.15 |
| 56 | 0.15 | 0.00 | 0.29 | 0.15 | 0.14 | 0.14 | 0.10 |

(3) The prediction accuracies obtained by the integrated method on  $DS_2$

| Order | First time (%) | Second time (%) | Third time (%) | Fourth time (%) | Fifth time (%) | Mean (%) | Standard deviation (%) |
|-------|----------------|-----------------|----------------|-----------------|----------------|----------|------------------------|
| 1     | 51.05          | 50.54           | 51.37          | 52.38           | 52.07          | 51.48    | 0.75                   |
| 2     | 18.25          | 19.14           | 17.42          | 18.05           | 18.44          | 18.26    | 0.62                   |
| 3     | 8.01           | 6.68            | 8.58           | 6.68            | 6.42           | 7.27     | 0.96                   |
| 4     | 5.79           | 5.91            | 4.45           | 5.53            | 5.98           | 5.53     | 0.63                   |
| 5     | 3.75           | 4.13            | 4.70           | 4.20            | 4.51           | 4.26     | 0.37                   |
| 6     | 2.42           | 2.86            | 3.05           | 3.18            | 2.42           | 2.78     | 0.36                   |
| 7     | 2.42           | 2.80            | 2.42           | 2.67            | 2.61           | 2.58     | 0.17                   |
| 8     | 1.78           | 1.59            | 2.10           | 1.34            | 2.29           | 1.82     | 0.38                   |
| 9     | 2.54           | 1.84            | 1.84           | 1.78            | 1.40           | 1.88     | 0.41                   |
| 10    | 1.46           | 2.10            | 1.46           | 1.34            | 1.14           | 1.50     | 0.36                   |
| 11    | 1.59           | 1.34            | 1.21           | 1.21            | 1.59           | 1.39     | 0.19                   |
| 12    | 1.53           | 1.72            | 1.65           | 1.84            | 1.40           | 1.63     | 0.17                   |

|    |      |      |      |      |      |      |      |
|----|------|------|------|------|------|------|------|
| 13 | 1.78 | 1.46 | 1.72 | 1.59 | 1.21 | 1.55 | 0.23 |
| 14 | 1.46 | 1.21 | 1.53 | 0.95 | 1.34 | 1.30 | 0.23 |
| 15 | 0.51 | 1.14 | 1.02 | 1.14 | 1.08 | 0.98 | 0.27 |
| 16 | 0.83 | 0.95 | 0.57 | 0.64 | 0.83 | 0.76 | 0.16 |
| 17 | 1.02 | 0.83 | 0.95 | 1.14 | 0.76 | 0.94 | 0.15 |
| 18 | 0.89 | 0.95 | 0.70 | 1.08 | 0.64 | 0.85 | 0.18 |
| 19 | 1.34 | 0.76 | 1.34 | 1.14 | 0.83 | 1.08 | 0.27 |
| 20 | 1.02 | 1.08 | 1.02 | 0.83 | 1.21 | 1.03 | 0.14 |
| 21 | 0.89 | 0.95 | 0.76 | 1.21 | 0.95 | 0.95 | 0.16 |
| 22 | 1.27 | 0.89 | 1.21 | 1.34 | 0.89 | 1.12 | 0.21 |
| 23 | 1.14 | 1.02 | 0.76 | 0.76 | 1.14 | 0.97 | 0.19 |
| 24 | 0.51 | 0.51 | 0.57 | 0.51 | 0.83 | 0.58 | 0.14 |
| 25 | 1.21 | 1.27 | 0.76 | 0.83 | 0.76 | 0.97 | 0.25 |
| 26 | 0.76 | 0.76 | 1.02 | 0.89 | 1.34 | 0.95 | 0.24 |
| 27 | 0.70 | 0.76 | 0.51 | 0.83 | 0.38 | 0.64 | 0.19 |
| 28 | 0.76 | 0.51 | 0.57 | 0.45 | 0.45 | 0.55 | 0.13 |
| 29 | 0.51 | 0.76 | 0.51 | 0.76 | 0.57 | 0.62 | 0.13 |
| 30 | 0.64 | 0.64 | 0.83 | 0.38 | 0.57 | 0.61 | 0.16 |
| 31 | 0.19 | 0.25 | 0.45 | 0.19 | 0.45 | 0.31 | 0.13 |
| 32 | 0.45 | 0.76 | 0.25 | 0.19 | 0.64 | 0.46 | 0.24 |
| 33 | 0.51 | 0.57 | 0.70 | 0.45 | 0.45 | 0.53 | 0.11 |
| 34 | 0.45 | 0.25 | 0.83 | 0.32 | 0.51 | 0.47 | 0.22 |

|    |      |      |      |      |      |      |      |
|----|------|------|------|------|------|------|------|
| 35 | 0.45 | 0.45 | 0.38 | 0.38 | 0.32 | 0.39 | 0.05 |
| 36 | 0.38 | 0.38 | 0.64 | 0.83 | 0.83 | 0.61 | 0.22 |
| 37 | 0.76 | 0.64 | 0.51 | 0.70 | 0.38 | 0.60 | 0.15 |
| 38 | 0.19 | 0.19 | 0.38 | 0.64 | 0.32 | 0.34 | 0.18 |
| 39 | 0.51 | 0.57 | 0.51 | 0.57 | 0.57 | 0.55 | 0.03 |
| 40 | 0.45 | 0.76 | 0.83 | 0.70 | 0.57 | 0.66 | 0.15 |
| 41 | 0.32 | 0.32 | 0.25 | 0.38 | 0.57 | 0.37 | 0.12 |
| 42 | 0.32 | 0.38 | 0.38 | 0.57 | 0.51 | 0.43 | 0.10 |
| 43 | 0.51 | 0.38 | 0.45 | 0.32 | 0.70 | 0.47 | 0.15 |
| 44 | 0.45 | 0.45 | 0.38 | 0.45 | 0.32 | 0.41 | 0.06 |
| 45 | 0.38 | 0.51 | 0.51 | 0.51 | 0.45 | 0.47 | 0.06 |
| 46 | 0.45 | 0.51 | 0.38 | 0.45 | 0.51 | 0.46 | 0.05 |
| 47 | 0.25 | 0.32 | 0.25 | 0.45 | 0.38 | 0.33 | 0.08 |
| 48 | 0.32 | 0.38 | 0.38 | 0.32 | 0.19 | 0.32 | 0.08 |
| 49 | 0.19 | 0.19 | 0.06 | 0.13 | 0.13 | 0.14 | 0.05 |
| 50 | 0.13 | 0.32 | 0.38 | 0.13 | 0.57 | 0.31 | 0.19 |
| 51 | 0.70 | 0.45 | 0.51 | 0.57 | 0.51 | 0.55 | 0.10 |
| 52 | 0.32 | 0.32 | 0.19 | 0.19 | 0.45 | 0.29 | 0.11 |
| 53 | 0.32 | 0.25 | 0.32 | 0.51 | 0.51 | 0.38 | 0.12 |
| 54 | 0.45 | 0.38 | 0.38 | 0.45 | 0.32 | 0.39 | 0.05 |
| 55 | 0.19 | 0.32 | 0.38 | 0.32 | 0.19 | 0.28 | 0.09 |
| 56 | 0.06 | 0.06 | 0.19 | 0.13 | 0.13 | 0.11 | 0.05 |
