# Supplementary material for: Prediction of Drug Indications Based on Chemical Interactions and Chemical Similarities
Source: Hindawi journal article supplement (doi:10.1155/2015/584546), 2015-01-01
Supplement: f1 [file 584546.f1.zip]

**Supplementary Material VII.** The prediction accuracy for each category by collecting the first two predictions obtained by the integrated method on  $DS_2$

| <b>Tag of disease</b> | <b>First time (%)</b> | <b>Second time (%)</b> | <b>Third time (%)</b> | <b>Fourth time (%)</b> | <b>Fifth time (%)</b> | <b>Mean (%)</b> |
|-----------------------|-----------------------|------------------------|-----------------------|------------------------|-----------------------|-----------------|
| $D_1$                 | 69.29                 | 68.50                  | 68.50                 | 70.08                  | 70.87                 | 69.45           |
| $D_2$                 | 28.57                 | 28.57                  | 14.29                 | 14.29                  | 0.00                  | 17.14           |
| $D_3$                 | 44.68                 | 48.94                  | 48.94                 | 46.81                  | 51.06                 | 48.09           |
| $D_4$                 | 42.86                 | 42.86                  | 28.57                 | 42.86                  | 42.86                 | 40.00           |
| $D_5$                 | 31.58                 | 21.05                  | 21.05                 | 26.32                  | 36.84                 | 27.37           |
| $D_6$                 | 53.33                 | 60.00                  | 56.67                 | 56.67                  | 53.33                 | 56.00           |
| $D_7$                 | 36.17                 | 27.66                  | 36.17                 | 36.17                  | 34.04                 | 34.04           |
| $D_8$                 | 55.56                 | 55.56                  | 55.56                 | 55.56                  | 55.56                 | 55.56           |
| $D_9$                 | 6.67                  | 13.33                  | 6.67                  | 0.00                   | 13.33                 | 8.00            |
| $D_{10}$              | 52.17                 | 52.17                  | 52.17                 | 52.17                  | 54.35                 | 52.61           |
| $D_{11}$              | 85.71                 | 85.71                  | 85.71                 | 85.71                  | 85.71                 | 85.71           |
| $D_{12}$              | 67.36                 | 67.36                  | 64.77                 | 66.84                  | 64.77                 | 66.22           |
| $D_{13}$              | 0.00                  | 0.00                   | 0.00                  | 0.00                   | 0.00                  | 0.00            |
| $D_{14}$              | 0.00                  | 30.77                  | 23.08                 | 23.08                  | 23.08                 | 20.00           |
| $D_{15}$              | 54.55                 | 54.55                  | 45.45                 | 45.45                  | 54.55                 | 50.91           |
| $D_{16}$              | 35.71                 | 35.71                  | 50.00                 | 35.71                  | 35.71                 | 38.57           |
| $D_{17}$              | 40.91                 | 40.91                  | 38.64                 | 34.09                  | 47.73                 | 40.45           |
| $D_{18}$              | 48.65                 | 45.95                  | 45.95                 | 51.35                  | 43.24                 | 47.03           |
| $D_{19}$              | 69.77                 | 70.93                  | 66.28                 | 67.44                  | 70.93                 | 69.07           |
| $D_{20}$              | 62.04                 | 62.96                  | 63.89                 | 68.52                  | 67.59                 | 65.00           |
| $D_{21}$              | 11.11                 | 11.11                  | 11.11                 | 22.22                  | 11.11                 | 13.33           |
| $D_{22}$              | 67.29                 | 67.29                  | 65.42                 | 69.16                  | 68.22                 | 67.48           |
| $D_{23}$              | 15.79                 | 5.26                   | 10.53                 | 15.79                  | 15.79                 | 12.63           |
| $D_{24}$              | 25.00                 | 33.33                  | 25.00                 | 8.33                   | 20.83                 | 22.50           |
| $D_{25}$              | 70.23                 | 64.89                  | 68.70                 | 68.70                  | 68.70                 | 68.24           |
| $D_{26}$              | 27.27                 | 31.82                  | 27.27                 | 31.82                  | 22.73                 | 28.18           |
| $D_{27}$              | 73.91                 | 69.57                  | 69.57                 | 73.91                  | 73.91                 | 72.17           |
| $D_{28}$              | 51.61                 | 58.06                  | 54.84                 | 54.84                  | 54.84                 | 54.84           |

|          |        |       |       |       |       |       |
|----------|--------|-------|-------|-------|-------|-------|
| $D_{29}$ | 68.13  | 71.43 | 71.43 | 75.82 | 74.73 | 72.31 |
| $D_{30}$ | 38.46  | 15.38 | 38.46 | 30.77 | 23.08 | 29.23 |
| $D_{31}$ | 29.41  | 20.59 | 38.24 | 26.47 | 23.53 | 27.65 |
| $D_{32}$ | 0.00   | 0.00  | 0.00  | 0.00  | 0.00  | 0.00  |
| $D_{33}$ | 31.25  | 18.75 | 50.00 | 18.75 | 31.25 | 30.00 |
| $D_{34}$ | 80.43  | 79.35 | 78.26 | 72.83 | 81.52 | 78.48 |
| $D_{35}$ | 40.00  | 40.00 | 40.00 | 40.00 | 45.00 | 41.00 |
| $D_{36}$ | 10.00  | 10.00 | 0.00  | 0.00  | 0.00  | 4.00  |
| $D_{37}$ | 39.13  | 45.65 | 36.96 | 43.48 | 47.83 | 42.61 |
| $D_{38}$ | 33.33  | 44.44 | 44.44 | 55.56 | 44.44 | 44.44 |
| $D_{39}$ | 54.24  | 54.24 | 45.76 | 61.02 | 54.24 | 53.90 |
| $D_{40}$ | 11.76  | 23.53 | 17.65 | 23.53 | 17.65 | 18.82 |
| $D_{41}$ | 62.96  | 55.56 | 59.26 | 59.26 | 55.56 | 58.52 |
| $D_{42}$ | 72.73  | 75.00 | 72.73 | 72.73 | 70.45 | 72.73 |
| $D_{43}$ | 47.83  | 47.83 | 43.48 | 47.83 | 43.48 | 46.09 |
| $D_{44}$ | 23.08  | 30.77 | 23.08 | 38.46 | 38.46 | 30.77 |
| $D_{45}$ | 55.71  | 62.86 | 55.71 | 58.57 | 55.71 | 57.71 |
| $D_{46}$ | 50.00  | 50.00 | 50.00 | 50.00 | 50.00 | 50.00 |
| $D_{47}$ | 22.22  | 22.22 | 44.44 | 55.56 | 33.33 | 35.56 |
| $D_{48}$ | 50.00  | 50.00 | 50.00 | 50.00 | 50.00 | 50.00 |
| $D_{49}$ | 46.15  | 46.15 | 46.15 | 53.85 | 53.85 | 49.23 |
| $D_{50}$ | 28.57  | 14.29 | 14.29 | 28.57 | 0.00  | 17.14 |
| $D_{51}$ | 31.03  | 44.83 | 37.93 | 41.38 | 44.83 | 40.00 |
| $D_{52}$ | 45.45  | 54.55 | 45.45 | 54.55 | 45.45 | 49.09 |
| $D_{53}$ | 15.38  | 15.38 | 23.08 | 15.38 | 15.38 | 16.92 |
| $D_{54}$ | 12.50  | 12.50 | 12.50 | 12.50 | 12.50 | 12.50 |
| $D_{55}$ | 14.29  | 14.29 | 21.43 | 21.43 | 14.29 | 17.14 |
| $D_{56}$ | 100.00 | 85.71 | 85.71 | 85.71 | 85.71 | 88.57 |
