# Supplementary material for: Prediction of Drug Indications Based on Chemical Interactions and Chemical Similarities
Source: Hindawi journal article supplement (doi:10.1155/2015/584546), 2015-01-01
Supplement: f1 [file 584546.f1.zip]

**Supplementary Material III.** The dataset  $DS_2$  consisting of 1,573 drug compounds that are classified into 56 categories.

(1)  $S_1$ : 127 drug compounds can treat ‘Antihypertensive’

|              |              |              |              |
|--------------|--------------|--------------|--------------|
| CID000000119 | CID000000159 | CID000001236 | CID000001257 |
| CID000001978 | CID000002092 | CID000002162 | CID000002169 |
| CID000002239 | CID000002249 | CID000002277 | CID000002311 |
| CID000002369 | CID000002405 | CID000002550 | CID000002583 |
| CID000002585 | CID000002732 | CID000002803 | CID000002910 |
| CID000002966 | CID000003152 | CID000003157 | CID000003222 |
| CID000003333 | CID000003341 | CID000003442 | CID000003637 |
| CID000003647 | CID000003693 | CID000003702 | CID000003777 |
| CID000003822 | CID000003869 | CID000003937 | CID000004008 |
| CID000004032 | CID000004138 | CID000004170 | CID000004171 |
| CID000004411 | CID000004418 | CID000004507 | CID000004688 |
| CID000004724 | CID000004768 | CID000004810 | CID000004826 |
| CID000004893 | CID000004946 | CID000005038 | CID000005052 |
| CID000005077 | CID000005253 | CID000005374 | CID000005401 |
| CID000005417 | CID000005478 | CID000005537 | CID000005560 |
| CID000005591 | CID000005724 | CID000006242 | CID000006244 |
| CID000006307 | CID000013122 | CID000014641 | CID000020810 |
| CID000023576 | CID000030668 | CID000033625 | CID000036920 |
| CID000038409 | CID000039974 | CID000051045 | CID000054410 |
| CID000057327 | CID000060879 | CID000065630 | CID000065636 |
| CID000065675 | CID000065923 | CID000065999 | CID000071144 |
| CID000071301 | CID000094342 | CID000104865 | CID000121925 |
| CID000122116 | CID000123697 | CID000133621 | CID000134290 |
| CID000156874 | CID000160109 | CID000164089 | CID000168089 |
| CID000208923 | CID000234846 | CID000443423 | CID000612747 |
| CID003022645 | CID003086142 | CID004474936 | CID004488490 |
| CID004687013 | CID005230270 | CID006421038 | CID009844747 |
| CID009894460 | CID009961746 | CID009992142 | CID010319293 |
| CID012962084 | CID013041183 | CID013105693 | CID013773304 |
| CID014130503 | CID014478256 | CID019695974 | CID020725583 |
| CID021715924 | CID021865524 | CID021865526 | CID021896713 |
| CID021902176 | CID053394056 | CID053394208 |              |

(2)  $S_2$ : 7 drug compounds can treat ‘Uterine stimulant’

|              |              |              |              |
|--------------|--------------|--------------|--------------|
| CID000000158 | CID000000160 | CID000003250 | CID000003966 |
| CID000005011 | CID000008229 | CID005229711 |              |

(3)  $S_3$ : 47 drug compounds can treat ‘Antithrombotic’

|              |              |              |              |
|--------------|--------------|--------------|--------------|
| CID000000159 | CID000001117 | CID000002197 | CID000002352 |
| CID000002552 | CID000002754 | CID000002806 | CID000004056 |

|              |              |              |              |
|--------------|--------------|--------------|--------------|
| CID000004646 | CID000004760 | CID000005036 | CID000005160 |
| CID000005472 | CID000005486 | CID000005537 | CID000010606 |
| CID000042923 | CID000051550 | CID000053001 | CID000054343 |
| CID000060404 | CID000065889 | CID000065927 | CID000065971 |
| CID000068942 | CID000070846 | CID000071453 | CID000204102 |
| CID000266934 | CID003086644 | CID004631610 | CID005034185 |
| CID006433119 | CID006450819 | CID010182969 | CID010275777 |
| CID010549838 | CID011604525 | CID011635624 | CID011958180 |
| CID019609133 | CID021864628 | CID021865528 | CID021896638 |
| CID054676038 | CID054678486 | CID054685524 |              |

(4)  $S_4$ : 7 drug compounds can treat 'Radioactive agent'

|              |              |              |              |
|--------------|--------------|--------------|--------------|
| CID000000175 | CID000000861 | CID000000876 | CID000005118 |
| CID000006181 | CID009952054 | CID022896913 |              |

(5)  $S_5$ : 19 drug compounds can treat 'Pharmaceutic aid'

|              |              |              |              |
|--------------|--------------|--------------|--------------|
| CID000000176 | CID000000242 | CID000000311 | CID000000607 |
| CID000000611 | CID000000723 | CID000000876 | CID000000943 |
| CID000000996 | CID000001183 | CID000002335 | CID000002683 |
| CID000002758 | CID000005281 | CID000016124 | CID000104745 |
| CID000122903 | CID000320761 | CID016684927 |              |

(6)  $S_6$ : 30 drug compounds can treat 'Antiarrhythmic'

|              |              |              |              |
|--------------|--------------|--------------|--------------|
| CID000000187 | CID000000191 | CID000001978 | CID000002157 |
| CID000002249 | CID000002747 | CID000002798 | CID000003114 |
| CID000003356 | CID000003649 | CID000004171 | CID000004178 |
| CID000004342 | CID000004411 | CID000004913 | CID000004932 |
| CID000004946 | CID000005253 | CID000036920 | CID000058505 |
| CID000060753 | CID000060939 | CID000065637 | CID000071329 |
| CID000107867 | CID000114840 | CID000130400 | CID000151172 |
| CID000208898 | CID003033962 |              |              |

(7)  $S_7$ : 47 drug compounds can treat 'Vasodilator'

|              |              |              |              |
|--------------|--------------|--------------|--------------|
| CID000000187 | CID000000197 | CID000000231 | CID000000946 |
| CID000002162 | CID000002351 | CID000002366 | CID000002585 |
| CID000002761 | CID000002998 | CID000003076 | CID000003108 |
| CID000003333 | CID000003336 | CID000003341 | CID000003606 |
| CID000003671 | CID000003689 | CID000003783 | CID000003926 |
| CID000004417 | CID000004485 | CID000004497 | CID000004631 |
| CID000004646 | CID000004740 | CID000004746 | CID000004826 |
| CID000004932 | CID000005429 | CID000005673 | CID000006101 |
| CID000010302 | CID000010680 | CID000013122 | CID000014641 |
| CID000021109 | CID000023480 | CID000053421 | CID000054343 |
| CID000168089 | CID000216237 | CID004549312 | CID005230270 |

CID010173280 CID022451303 CID053394043

(8)  $S_8$ : 9 drug compounds can treat 'Laxative'

CID000000206 CID0000002391 CID0000002950 CID0000003220  
CID0000004764 CID0000005199 CID0000248507 CID0000313325  
CID009796459

(9)  $S_9$ : 15 drug compounds can treat 'Diagnostic aid'

CID000000206 CID000000229 CID0000001436 CID0000002548  
CID0000003202 CID0000004174 CID0000004734 CID0000005120  
CID0000005345 CID0000008272 CID0000644102 CID003834960  
CID004584640 CID006916025 CID009952054

(10)  $S_{10}$ : 46 drug compounds can treat 'Antiviral'

CID0000000596 CID0000001203 CID0000001814 CID0000002130  
CID0000002177 CID0000002210 CID0000002235 CID0000003183  
CID0000003414 CID0000003415 CID0000003495 CID0000003706  
CID0000003817 CID0000004451 CID0000004603 CID0000005076  
CID0000005155 CID0000005475 CID0000005625 CID0000005718  
CID0000005726 CID00000057469 CID00000060172 CID0000108042  
CID0000131411 CID0000193962 CID0000253083 CID0000263976  
CID0000284240 CID0000352555 CID0000352992 CID0000360849  
CID0000362949 CID0000466146 CID003579812 CID003907483  
CID005280442 CID005281051 CID005358385 CID011964344  
CID021336308 CID021696352 CID021889836 CID022570509  
CID023594367 CID054676814

(11)  $S_{11}$ : 14 drug compounds can treat 'Nutrient'

CID0000000288 CID0000000424 CID0000000586 CID0000000602  
CID0000000614 CID0000000617 CID0000000750 CID0000000791  
CID0000000857 CID0000000876 CID0000000994 CID0000001148  
CID0000001153 CID0000001182

(12)  $S_{12}$ : 193 drug compounds can treat 'Antineoplastic'

CID0000000225 CID0000000323 CID0000000596 CID0000000944  
CID0000001288 CID0000001392 CID0000001691 CID0000001744  
CID0000001821 CID0000002008 CID0000002019 CID0000002123  
CID0000002145 CID0000002179 CID0000002187 CID0000002210  
CID0000002299 CID0000002356 CID0000002375 CID0000002538  
CID0000002578 CID0000002708 CID0000002746 CID0000002832  
CID0000002901 CID0000002919 CID0000003009 CID0000003126  
CID0000003143 CID0000003159 CID0000003213 CID0000003268  
CID0000003310 CID0000003350 CID0000003367 CID0000003385  
CID0000003408 CID0000003425 CID0000003599 CID0000003606

|              |              |              |              |
|--------------|--------------|--------------|--------------|
| CID000003624 | CID000003657 | CID000003750 | CID000003902 |
| CID000004053 | CID000004112 | CID000004212 | CID000004261 |
| CID000004272 | CID000004312 | CID000004416 | CID000004534 |
| CID000004865 | CID000005035 | CID000005097 | CID000005153 |
| CID000005244 | CID000005291 | CID000005311 | CID000005363 |
| CID000005394 | CID000005407 | CID000005515 | CID000005516 |
| CID000005538 | CID000005583 | CID000005604 | CID000005718 |
| CID000008082 | CID000010205 | CID000011016 | CID000012717 |
| CID000017534 | CID000019909 | CID000024466 | CID000038778 |
| CID000042723 | CID000042785 | CID000050515 | CID000051323 |
| CID000054369 | CID000054929 | CID000055645 | CID000056487 |
| CID000057030 | CID000059693 | CID000060791 | CID000060796 |
| CID000065558 | CID000071349 | CID000071750 | CID000072035 |
| CID000072116 | CID000082146 | CID000086838 | CID000100146 |
| CID000100208 | CID000107805 | CID000108042 | CID000108143 |
| CID000119373 | CID000122077 | CID000122737 | CID000123015 |
| CID000123631 | CID000123917 | CID000148193 | CID000151194 |
| CID000176167 | CID000176870 | CID000177347 | CID000177941 |
| CID000206042 | CID000208908 | CID000216239 | CID000216467 |
| CID000216468 | CID000233502 | CID000237254 | CID000247955 |
| CID000256411 | CID000266767 | CID000279063 | CID000323701 |
| CID000327045 | CID000330164 | CID000354624 | CID000360682 |
| CID000389644 | CID000415541 | CID000421884 | CID000422111 |
| CID000433449 | CID000433902 | CID000439739 | CID000494161 |
| CID000573837 | CID000644241 | CID003047716 | CID003062316 |
| CID003081361 | CID003086685 | CID003086686 | CID003478439 |
| CID003717450 | CID003794430 | CID004990817 | CID005213527 |
| CID005328940 | CID005466794 | CID005494449 | CID006433099 |
| CID009804157 | CID009815758 | CID009823820 | CID009852353 |
| CID009859767 | CID009865515 | CID009867822 | CID009911830 |
| CID010113978 | CID010127622 | CID010202048 | CID010302451 |
| CID011451527 | CID011485656 | CID011497983 | CID011597571 |
| CID011640390 | CID011667893 | CID011960528 | CID011964344 |
| CID015574853 | CID016760627 | CID017754772 | CID018350668 |
| CID019609831 | CID020516612 | CID021867770 | CID021874004 |
| CID022058234 | CID022671105 | CID023145858 | CID023392970 |
| CID024748573 | CID024776445 | CID024826799 | CID024889392 |
| CID025059310 | CID044208978 | CID053396328 | CID053437714 |
| CID053445376 |              |              |              |

(13)  $S_{13}$ : 17 drug compounds can treat 'Antipsoriatic'

|              |              |              |              |
|--------------|--------------|--------------|--------------|
| CID000000231 | CID000000595 | CID000002202 | CID000002355 |
| CID000002522 | CID000002722 | CID000002900 | CID000003126 |
| CID000056237 | CID000059757 | CID000060816 | CID000072139 |

CID000156422 CID000170377 CID009799888 CID009818231  
CID010151715

(14) $S_{14}$ : 13 drug compounds can treat 'Vasoconstrictor'

CID000000231 CID000002791 CID000003677 CID000003917  
CID000004163 CID000004436 CID000005032 CID000005419  
CID000005709 CID000006082 CID000007172 CID000007608  
CID000018830

(15) $S_{15}$ : 22 drug compounds can treat 'Anthelmintic'

CID000000237 CID000002230 CID000002871 CID000003037  
CID000003039 CID000003150 CID000003610 CID000003816  
CID000003913 CID000004477 CID000004891 CID000005361  
CID000005430 CID000005853 CID000007108 CID000010212  
CID000010579 CID000012855 CID000022526 CID000042574  
CID000327378 CID004330618

(16) $S_{16}$ : 14 drug compounds can treat 'Antimalarial'

CID000000237 CID000000572 CID000002240 CID000002353  
CID000002719 CID000002757 CID000003503 CID000003649  
CID000004046 CID000004993 CID000009049 CID000037393  
CID000068928 CID000101745

(17) $S_{17}$ : 44 drug compounds can treat 'Antifungal'

CID000000242 CID000000342 CID000000401 CID000001972  
CID000002202 CID000002378 CID000002749 CID000002794  
CID000003198 CID000003321 CID000003365 CID000003512  
CID000003767 CID000003777 CID000003793 CID000003823  
CID000005154 CID000005318 CID000005402 CID000005455  
CID000005510 CID000005604 CID000006989 CID000007019  
CID000007184 CID000007456 CID000010662 CID000021782  
CID000039385 CID000047472 CID000065130 CID000067686  
CID000069506 CID000072300 CID000072303 CID000073342  
CID000073549 CID000104745 CID000353481 CID004065234  
CID005231054 CID009963430 CID015224271 CID021910730

(18) $S_{18}$ : 37 drug compounds can treat 'Hypolipidemic'

CID000000288 CID000000861 CID000000938 CID000001662  
CID000002796 CID000002797 CID000002854 CID000003339  
CID000003463 CID000004599 CID000004912 CID000004990  
CID000005218 CID000005804 CID000006536 CID000008111  
CID000018026 CID000033584 CID000039042 CID000051576  
CID000065036 CID000071355 CID000086821 CID000166558  
CID000206044 CID000415541 CID003025811 CID003318754

|              |              |              |              |
|--------------|--------------|--------------|--------------|
| CID004129359 | CID004490624 | CID004636596 | CID004677798 |
| CID004979942 | CID005310993 | CID006918540 | CID009853053 |
| CID018177392 |              |              |              |

(19) $S_{19}$ : 86 drug compounds can treat 'Antibacterial'

|               |               |               |               |
|---------------|---------------|---------------|---------------|
| CID000000298  | CID000000346  | CID000000401  | CID000000572  |
| CID0000002178 | CID0000002349 | CID0000002353 | CID0000002609 |
| CID0000002610 | CID0000002614 | CID0000002622 | CID0000002626 |
| CID0000002632 | CID0000002657 | CID0000002659 | CID0000002675 |
| CID0000002748 | CID0000002762 | CID0000002764 | CID0000002794 |
| CID0000002814 | CID0000002817 | CID0000002955 | CID0000003115 |
| CID0000003229 | CID0000003240 | CID0000003255 | CID0000003417 |
| CID0000003443 | CID0000003561 | CID0000003767 | CID0000003928 |
| CID0000003929 | CID0000003998 | CID0000004264 | CID0000004421 |
| CID0000004509 | CID0000004539 | CID0000004583 | CID0000004835 |
| CID0000005215 | CID0000005257 | CID0000005320 | CID0000005328 |
| CID0000005329 | CID0000005333 | CID0000005335 | CID0000005336 |
| CID0000005340 | CID0000005344 | CID0000005379 | CID0000005426 |
| CID0000005433 | CID0000005456 | CID0000005496 | CID0000005604 |
| CID0000005651 | CID0000006301 | CID0000007628 | CID0000010205 |
| CID0000011092 | CID0000019910 | CID0000021453 | CID0000021943 |
| CID0000029661 | CID0000031771 | CID0000065450 | CID0000068916 |
| CID0000069506 | CID0000072300 | CID0000072303 | CID0000072474 |
| CID0000072938 | CID0000213043 | CID0000418931 | CID0000481696 |
| CID000582362  | CID004580358  | CID004630412  | CID005206924  |
| CID009868368  | CID021584396  | CID023424116  | CID053395233  |
| CID053398664  | CID054678491  |               |               |

(20) $S_{20}$ : 108 drug compounds can treat 'Antibiotic'

|               |               |               |               |
|---------------|---------------|---------------|---------------|
| CID000000298  | CID000000346  | CID000000401  | CID000000572  |
| CID0000002171 | CID0000002178 | CID0000002199 | CID0000002235 |
| CID0000002274 | CID0000002346 | CID0000002349 | CID0000002353 |
| CID0000002609 | CID0000002610 | CID0000002614 | CID0000002622 |
| CID0000002626 | CID0000002632 | CID0000002657 | CID0000002659 |
| CID0000002675 | CID0000002748 | CID0000002762 | CID0000002764 |
| CID0000002794 | CID0000002814 | CID0000002817 | CID0000002919 |
| CID0000002955 | CID0000003115 | CID0000003229 | CID0000003240 |
| CID0000003255 | CID0000003417 | CID0000003430 | CID0000003443 |
| CID0000003477 | CID0000003561 | CID0000003767 | CID0000003928 |
| CID0000003929 | CID0000003998 | CID0000004084 | CID0000004264 |
| CID0000004421 | CID0000004454 | CID0000004509 | CID0000004539 |
| CID0000004583 | CID0000004835 | CID0000005039 | CID0000005154 |
| CID0000005215 | CID0000005257 | CID0000005320 | CID0000005328 |
| CID0000005329 | CID0000005333 | CID0000005335 | CID0000005336 |

|              |              |              |              |
|--------------|--------------|--------------|--------------|
| CID000005340 | CID000005344 | CID000005379 | CID000005433 |
| CID000005456 | CID000005496 | CID000005651 | CID000006054 |
| CID000006301 | CID000007628 | CID000010205 | CID000011092 |
| CID000012550 | CID000019910 | CID000021453 | CID000021943 |
| CID000029661 | CID000031771 | CID000038258 | CID000040586 |
| CID000065036 | CID000065450 | CID000068066 | CID000068916 |
| CID000069506 | CID000072300 | CID000072303 | CID000072474 |
| CID000072938 | CID000104867 | CID000237254 | CID000248010 |
| CID000284995 | CID000353481 | CID000418931 | CID000426058 |
| CID000481696 | CID000582362 | CID004580358 | CID004630412 |
| CID005080908 | CID005206924 | CID009838180 | CID021584396 |
| CID021881641 | CID023424116 | CID053395233 | CID054678491 |

(21) $S_{21}$ : 9 drug compounds can treat ‘Choleretic’

|              |              |              |              |
|--------------|--------------|--------------|--------------|
| CID000000303 | CID000002889 | CID000009934 | CID000011366 |
| CID000028329 | CID000032800 | CID000071894 | CID000248507 |
| CID005280567 |              |              |              |

(22) $S_{22}$ : 107 drug compounds can treat ‘Antiinflammatory’

|              |              |              |              |
|--------------|--------------|--------------|--------------|
| CID000000323 | CID000000338 | CID000000679 | CID000001302 |
| CID000001981 | CID000002136 | CID000002244 | CID000002299 |
| CID000002462 | CID000002466 | CID000002581 | CID000002662 |
| CID000002719 | CID000002735 | CID000002791 | CID000003033 |
| CID000003059 | CID000003194 | CID000003230 | CID000003308 |
| CID000003335 | CID000003342 | CID000003371 | CID000003394 |
| CID000003399 | CID000003418 | CID000003469 | CID000003495 |
| CID000003672 | CID000003718 | CID000003825 | CID000003826 |
| CID000003899 | CID000003965 | CID000004037 | CID000004044 |
| CID000004075 | CID000004240 | CID000004409 | CID000004488 |
| CID000004495 | CID000004614 | CID000004671 | CID000004781 |
| CID000004888 | CID000005090 | CID000005136 | CID000005161 |
| CID000005352 | CID000005359 | CID000005426 | CID000005480 |
| CID000005509 | CID000005733 | CID000015250 | CID000015330 |
| CID000023647 | CID000026248 | CID000031508 | CID000036663 |
| CID000043585 | CID000060490 | CID000060542 | CID000068704 |
| CID000068765 | CID000068806 | CID000071237 | CID000071246 |
| CID000071321 | CID000071697 | CID000071751 | CID000094777 |
| CID000119607 | CID000123619 | CID000130506 | CID000151166 |
| CID000151170 | CID000156422 | CID000159271 | CID000166564 |
| CID000204106 | CID000208910 | CID000216294 | CID000285225 |
| CID000416119 | CID000521440 | CID002132298 | CID002734673 |
| CID003022645 | CID003058754 | CID003086668 | CID004129359 |
| CID005275741 | CID005281605 | CID005358385 | CID009818231 |
| CID009820008 | CID009888017 | CID010151715 | CID011364450 |

CID013773531 CID016220188 CID018426762 CID018767415  
CID022267137 CID054676228 CID054677470

(23) $S_{23}$ : 19 drug compounds can treat 'Immunomodulator'

CID000000323 CID000001153 CID000002909 CID000003899  
CID000005040 CID000005372 CID000005426 CID000033334  
CID000057469 CID000107970 CID000284995 CID000360849  
CID003086668 CID006433115 CID009818231 CID009820008  
CID010296883 CID011964344 CID023526785

(24) $S_{24}$ : 24 drug compounds can treat 'Muscle relaxant'

CID000000323 CID000002083 CID000002153 CID000002284  
CID000002733 CID000004167 CID000004601 CID000004680  
CID000004770 CID000004919 CID000005314 CID000005429  
CID000005707 CID000007172 CID000028329 CID000039689  
CID000047319 CID000063114 CID000066270 CID000068678  
CID000069550 CID000071149 CID000093054 CID000261185

(25) $S_{25}$ : 131 drug compounds can treat 'Analgesic'

CID000000106 CID000000338 CID000000978 CID000001302  
CID000001983 CID000002244 CID000002353 CID000002466  
CID000002476 CID000002487 CID000002548 CID000002554  
CID000002828 CID000003059 CID000003066 CID000003148  
CID000003251 CID000003314 CID000003342 CID000003345  
CID000003394 CID000003418 CID000003448 CID000003469  
CID000003648 CID000003672 CID000003718 CID000003821  
CID000003825 CID000003826 CID000003916 CID000003918  
CID000003965 CID000004044 CID000004058 CID000004090  
CID000004095 CID000004163 CID000004419 CID000004440  
CID000004635 CID000004736 CID000004781 CID000004840  
CID000005078 CID000005090 CID000005145 CID000005147  
CID000005161 CID000005358 CID000005359 CID000005478  
CID000005480 CID000005523 CID000005620 CID000005656  
CID000005707 CID000005731 CID000005733 CID000006738  
CID000008593 CID000008602 CID000009648 CID000009942  
CID000010101 CID000010517 CID000010618 CID000010930  
CID000013493 CID000014707 CID000015250 CID000015330  
CID000016622 CID000019143 CID000021760 CID000028397  
CID000033176 CID000041531 CID000041693 CID000043585  
CID000051263 CID000053276 CID000056463 CID000060542  
CID000060618 CID000060698 CID000062156 CID000062518  
CID000063062 CID000065939 CID000066270 CID000066644  
CID000068089 CID000068883 CID000094777 CID000107822  
CID000107996 CID000115208 CID000119607 CID000123619



|              |              |              |              |
|--------------|--------------|--------------|--------------|
| CID000123642 | CID000151166 | CID000159271 | CID000204106 |
| CID000208910 | CID000273032 | CID000408120 | CID000430245 |
| CID000518962 | CID002132298 | CID002734673 | CID003022645 |
| CID003025955 | CID003047849 | CID003058754 | CID003966372 |
| CID004561569 | CID004630917 | CID005284561 | CID006421038 |
| CID006918236 | CID009865384 | CID009914310 | CID009929347 |
| CID010257218 | CID011169048 | CID012940550 | CID013995788 |
| CID015573150 | CID021264541 | CID021851774 |              |

(26) $S_{26}$ : 22 drug compounds can treat 'Disinfectant'

|              |              |              |              |
|--------------|--------------|--------------|--------------|
| CID000000342 | CID000000943 | CID000001292 | CID000001923 |
| CID000002017 | CID000002453 | CID000002681 | CID000002722 |
| CID000002993 | CID000003610 | CID000005564 | CID000006738 |
| CID000006855 | CID000007099 | CID000007547 | CID000008756 |
| CID000010662 | CID000011974 | CID000020906 | CID000031281 |
| CID000065130 | CID000327378 |              |              |

(27) $S_{27}$ : 23 drug compounds can treat 'Diuretic'

|              |              |              |              |
|--------------|--------------|--------------|--------------|
| CID000000346 | CID000002153 | CID000002471 | CID000002519 |
| CID000002732 | CID000002910 | CID000003278 | CID000003295 |
| CID000003440 | CID000003639 | CID000003647 | CID000003702 |
| CID000004170 | CID000005267 | CID000005429 | CID000005546 |
| CID000005560 | CID000005724 | CID000006307 | CID000038409 |
| CID000066120 | CID000069550 | CID000071894 |              |

(28) $S_{28}$ : 31 drug compounds can treat 'Anticonvulsant'

|              |              |              |              |
|--------------|--------------|--------------|--------------|
| CID000000401 | CID000001207 | CID000001775 | CID000002554 |
| CID000002802 | CID000003121 | CID000003291 | CID000003446 |
| CID000003878 | CID000004763 | CID000005356 | CID000005466 |
| CID000005514 | CID000005576 | CID000005665 | CID000005734 |
| CID000034312 | CID000053569 | CID000063114 | CID000065914 |
| CID000066160 | CID000071651 | CID000114709 | CID000521372 |
| CID003058746 | CID004715169 | CID009888224 | CID009904258 |
| CID010220180 | CID021634109 | CID054678486 |              |

(29) $S_{29}$ : 91 drug compounds can treat 'Antidepressant'

|              |              |              |              |
|--------------|--------------|--------------|--------------|
| CID000000408 | CID000000444 | CID000001148 | CID000001615 |
| CID000002081 | CID000002157 | CID000002160 | CID000002170 |
| CID000002580 | CID000002747 | CID000002771 | CID000002798 |
| CID000002801 | CID000002995 | CID000003114 | CID000003155 |
| CID000003158 | CID000003386 | CID000003404 | CID000003675 |
| CID000003703 | CID000003748 | CID000003947 | CID000004011 |
| CID000004178 | CID000004184 | CID000004199 | CID000004205 |
| CID000004235 | CID000004342 | CID000004380 | CID000004449 |

|              |              |              |              |
|--------------|--------------|--------------|--------------|
| CID000004500 | CID000004528 | CID000004541 | CID000004543 |
| CID000004913 | CID000004946 | CID000005011 | CID000005195 |
| CID000005210 | CID000005355 | CID000005530 | CID000005533 |
| CID000005584 | CID000005656 | CID000005666 | CID000009417 |
| CID000021722 | CID000021772 | CID000027400 | CID000033014 |
| CID000034521 | CID000037015 | CID000037632 | CID000038207 |
| CID000041987 | CID000043103 | CID000044571 | CID000044668 |
| CID000053432 | CID000053569 | CID000055718 | CID000060932 |
| CID000065650 | CID000065827 | CID000066270 | CID000068871 |
| CID000068883 | CID000071307 | CID000082148 | CID000104181 |
| CID000121852 | CID000122252 | CID000125368 | CID000130918 |
| CID000158621 | CID000208904 | CID003022645 | CID005259655 |
| CID006450815 | CID006918314 | CID009837966 | CID009865384 |
| CID009907323 | CID010219795 | CID010408902 | CID011622909 |
| CID015342071 | CID021071928 | CID021905905 |              |

(30) $S_{30}$ : 13 drug compounds can treat 'Antioxidant'

|              |              |              |              |
|--------------|--------------|--------------|--------------|
| CID000000745 | CID000000896 | CID000003503 | CID000003593 |
| CID000003594 | CID000004885 | CID000004947 | CID000007456 |
| CID000008456 | CID000031404 | CID005281605 | CID022267137 |
| CID054676860 |              |              |              |

(31) $S_{31}$ : 34 drug compounds can treat 'Antiparkinsonian'

|              |              |              |              |
|--------------|--------------|--------------|--------------|
| CID000000836 | CID000003290 | CID000004054 | CID000004885 |
| CID000004919 | CID000005070 | CID000005195 | CID000005406 |
| CID000023573 | CID000055036 | CID000057537 | CID000065535 |
| CID000065775 | CID000068778 | CID000068871 | CID000071202 |
| CID000071307 | CID000114903 | CID000122316 | CID000133106 |
| CID000156328 | CID000179342 | CID000198792 | CID000424631 |
| CID004659568 | CID004659569 | CID005280953 | CID005464105 |
| CID009838389 | CID009992142 | CID010060538 | CID010117987 |
| CID011722448 | CID021874557 |              |              |

(32) $S_{32}$ : 14 drug compounds can treat 'Antiulcerative'

|              |              |              |              |
|--------------|--------------|--------------|--------------|
| CID000000932 | CID000001123 | CID000002680 | CID000003231 |
| CID000003495 | CID000003883 | CID000004802 | CID000004848 |
| CID000031348 | CID000072928 | CID003058746 | CID004183806 |
| CID014842904 | CID016129681 |              |              |

(33) $S_{33}$ : 16 drug compounds can treat 'CNS stimulant'

|              |              |              |              |
|--------------|--------------|--------------|--------------|
| CID000000942 | CID000001206 | CID000001615 | CID000002137 |
| CID000002519 | CID000003007 | CID000004020 | CID000004158 |
| CID000004236 | CID000004815 | CID000005304 | CID000014373 |
| CID000034870 | CID000066270 | CID000107786 | CID000521372 |

(34) $S_{34}$ : 92 drug compounds can treat 'Antipsychotic'

|              |              |              |              |
|--------------|--------------|--------------|--------------|
| CID000001224 | CID000001238 | CID000002159 | CID000002448 |
| CID000002692 | CID000002726 | CID000002729 | CID000003168 |
| CID000003277 | CID000003372 | CID000003396 | CID000004078 |
| CID000004452 | CID000004595 | CID000004747 | CID000004830 |
| CID000004885 | CID000004917 | CID000005002 | CID000005024 |
| CID000005072 | CID000005073 | CID000005118 | CID000005265 |
| CID000005268 | CID000005355 | CID000005452 | CID000005454 |
| CID000005467 | CID000005567 | CID000005568 | CID000009417 |
| CID000009429 | CID000012454 | CID000013122 | CID000013333 |
| CID000015139 | CID000015443 | CID000016351 | CID000016362 |
| CID000016363 | CID000017676 | CID000019660 | CID000023897 |
| CID000031348 | CID000031765 | CID000032593 | CID000033630 |
| CID000051174 | CID000054742 | CID000054940 | CID000055445 |
| CID000055752 | CID000060149 | CID000060547 | CID000060703 |
| CID000060785 | CID000060795 | CID000060820 | CID000060854 |
| CID000060862 | CID000065490 | CID000068186 | CID000068604 |
| CID000068663 | CID000068678 | CID000068714 | CID000068751 |
| CID000071101 | CID000071351 | CID000071360 | CID000072038 |
| CID000119192 | CID000127912 | CID000128010 | CID000132190 |
| CID000172286 | CID000208917 | CID000208951 | CID000219050 |
| CID003052780 | CID003086153 | CID004118151 | CID004913274 |
| CID009795739 | CID009903970 | CID010114058 | CID010198800 |
| CID010247592 | CID014096625 | CID014958952 | CID044210114 |

(35) $S_{35}$ : 20 drug compounds can treat 'Antianginal'

|              |              |              |              |
|--------------|--------------|--------------|--------------|
| CID000001234 | CID000001978 | CID000002162 | CID000002249 |
| CID000002351 | CID000002369 | CID000002583 | CID000002585 |
| CID000002806 | CID000003869 | CID000004171 | CID000004411 |
| CID000004946 | CID000005253 | CID000005478 | CID000005486 |
| CID000036354 | CID000036920 | CID000151172 | CID006426711 |

(36) $S_{36}$ : 10 drug compounds can treat 'Cognition enhancer'

|              |              |              |              |
|--------------|--------------|--------------|--------------|
| CID000001253 | CID000002196 | CID000002377 | CID000003655 |
| CID000060691 | CID000122226 | CID000122316 | CID009805719 |
| CID011576663 | CID054278504 |              |              |

(37) $S_{37}$ : 46 drug compounds can treat 'Antidiabetic'

|              |              |              |              |
|--------------|--------------|--------------|--------------|
| CID000001613 | CID000002727 | CID000002750 | CID000003235 |
| CID000003349 | CID000003478 | CID000003488 | CID000004443 |
| CID000004547 | CID000004829 | CID000005098 | CID000005244 |
| CID000005505 | CID000005591 | CID000005677 | CID000018026 |
| CID000033584 | CID000051577 | CID000065673 | CID000068593 |

|              |              |              |              |
|--------------|--------------|--------------|--------------|
| CID000071976 | CID000077999 | CID000154000 | CID000206044 |
| CID000219048 | CID003025998 | CID004329839 | CID004630913 |
| CID005251896 | CID006433111 | CID009892366 | CID009910951 |
| CID009953887 | CID010477292 | CID011163584 | CID011306691 |
| CID011338777 | CID011420643 | CID011428861 | CID013105142 |
| CID022506569 | CID022665435 | CID023560495 | CID053400847 |
| CID054359967 | CID056669849 |              |              |

(38) $S_{38}$ : 9 drug compounds can treat 'Psychodysleptic'

|              |              |              |              |
|--------------|--------------|--------------|--------------|
| CID000001614 | CID000003981 | CID000004076 | CID000004266 |
| CID000004980 | CID000010257 | CID000010624 | CID000062065 |
| CID000062751 |              |              |              |

(39) $S_{39}$ : 59 drug compounds can treat 'Anxiolytic'

|              |              |              |              |
|--------------|--------------|--------------|--------------|
| CID000001615 | CID000002118 | CID000002451 | CID000002477 |
| CID000002543 | CID000002997 | CID000003016 | CID000003380 |
| CID000003958 | CID000004041 | CID000004184 | CID000004595 |
| CID000004770 | CID000004822 | CID000004847 | CID000004946 |
| CID000005024 | CID000005092 | CID000005378 | CID000005417 |
| CID000005426 | CID000005452 | CID000005522 | CID000005719 |
| CID000005732 | CID000005735 | CID000005736 | CID000006018 |
| CID000006077 | CID000006292 | CID000009330 | CID000010930 |
| CID000013314 | CID000015723 | CID000016106 | CID000037015 |
| CID000037632 | CID000039860 | CID000054897 | CID000056971 |
| CID000060769 | CID000060813 | CID000062865 | CID000065630 |
| CID000071257 | CID000071781 | CID000114827 | CID000121852 |
| CID000130918 | CID000132190 | CID000162834 | CID000208904 |
| CID000521372 | CID003058746 | CID003082387 | CID009837966 |
| CID009888224 | CID011430856 | CID021851988 |              |

(40) $S_{40}$ : 17 drug compounds can treat 'Anti-Alzheimer's Disease'

|              |              |              |              |
|--------------|--------------|--------------|--------------|
| CID000001646 | CID000002684 | CID000003152 | CID000003394 |
| CID000003655 | CID000004054 | CID000005077 | CID000060691 |
| CID000060809 | CID000060862 | CID000122226 | CID000131460 |
| CID000198752 | CID010224267 | CID011372756 | CID011576663 |
| CID021851902 |              |              |              |

(41) $S_{41}$ : 27 drug compounds can treat 'Antiemetic'

|              |              |              |              |
|--------------|--------------|--------------|--------------|
| CID000001683 | CID000002726 | CID000002780 | CID000002977 |
| CID000002978 | CID000003103 | CID000003148 | CID000003151 |
| CID000003510 | CID000004034 | CID000004595 | CID000004917 |
| CID000005355 | CID000005440 | CID000005467 | CID000005595 |
| CID000009429 | CID000026388 | CID000039860 | CID000059692 |
| CID000065939 | CID000065997 | CID000068678 | CID000107822 |

CID000108182 CID009817332 CID010232719

(42) $S_{42}$ : 44 drug compounds can treat 'Antihistamine'

CID000001687 CID000002200 CID000002247 CID000002267  
CID000002444 CID000002564 CID000002678 CID000002710  
CID000002725 CID000002761 CID000002781 CID000002782  
CID000002913 CID000003103 CID000003191 CID000003219  
CID000003241 CID000003348 CID000003915 CID000003957  
CID000004098 CID000004184 CID000004601 CID000004822  
CID000004992 CID000005039 CID000005588 CID000007077  
CID000010646 CID000011291 CID000016576 CID000019861  
CID000021855 CID000035758 CID000057520 CID000060865  
CID000065636 CID000065906 CID000108092 CID000123618  
CID000124087 CID000197033 CID001548992 CID003081087

(43) $S_{43}$ : 23 drug compounds can treat 'Cardiotonic'

CID000002153 CID000002249 CID000003061 CID000003698  
CID000003818 CID000004197 CID000004605 CID000004749  
CID000005429 CID000005663 CID000036811 CID000053708  
CID000055918 CID000060867 CID000069550 CID000114840  
CID000155774 CID000626931 CID005284402 CID005362399  
CID009953065 CID011689883 CID021865524

(44) $S_{44}$ : 13 drug compounds can treat 'Antiglaucoma'

CID000001986 CID000002216 CID000003154 CID000003777  
CID000003890 CID000004819 CID000004885 CID000005478  
CID000005524 CID000065673 CID000160109 CID003504707  
CID053394208

(45) $S_{45}$ : 70 drug compounds can treat 'Antiallergic/Antiasthmatic'

CID000000838 CID000001882 CID000002083 CID000002247  
CID000002267 CID000002449 CID000002678 CID000003182  
CID000003219 CID000003241 CID000003343 CID000003348  
CID000003410 CID000003433 CID000003495 CID000003671  
CID000003746 CID000003779 CID000003827 CID000004248  
CID000004615 CID000005032 CID000005152 CID000005255  
CID000005403 CID000005469 CID000005527 CID000005581  
CID000005717 CID000005723 CID000007172 CID000013683  
CID000037990 CID000045070 CID000057109 CID000060539  
CID000060719 CID000060831 CID000060856 CID000060865  
CID000065906 CID000065933 CID000069550 CID000071149  
CID000071350 CID000090895 CID000123618 CID000124270  
CID000129796 CID000130506 CID000130639 CID000154575  
CID000192306 CID000443423 CID000449193 CID000521440

CID003807559 CID005281605 CID006433117 CID009800339  
CID009883481 CID009890377 CID009896267 CID009896918  
CID009951154 CID009955657 CID011467167 CID021264541  
CID023287809 CID053394153

(46) $S_{46}$ : 12 drug compounds can treat 'Hypocholesterolemic'

CID000002250 CID000003339 CID003025811 CID003318754  
CID004490624 CID004636595 CID004677798 CID009853053  
CID009862248 CID010026128 CID010216733 CID022175537

(47) $S_{47}$ : 9 drug compounds can treat 'Uricosuric'

CID000002333 CID000004911 CID000005342 CID000010239  
CID000033584 CID000038409 CID000134018 CID000449035  
CID005288320

(48) $S_{48}$ : 16 drug compounds can treat 'Sedative/Hypnotic'

CID000002451 CID000003380 CID000004737 CID000004763  
CID000005426 CID000005719 CID000005732 CID000005735  
CID000006292 CID000013314 CID000016106 CID000060858  
CID000066160 CID000521372 CID006450813 CID009881626

(49) $S_{49}$ : 13 drug compounds can treat 'Anesthetic'

CID000002474 CID000002825 CID000003025 CID000003562  
CID000003676 CID000003821 CID000004192 CID000004621  
CID000005411 CID000006468 CID000010834 CID000019324  
CID000066270

(50) $S_{50}$ : 7 drug compounds can treat 'Antiamoebic'

CID000002719 CID000002860 CID000003430 CID000003728  
CID000009426 CID000019529 CID000071815

(51) $S_{51}$ : 29 drug compounds can treat 'Spasmolytic'

CID000002780 CID000002784 CID000002905 CID000003290  
CID000003623 CID000003636 CID000003678 CID000003775  
CID000003960 CID000004057 CID000004157 CID000004634  
CID000004839 CID000004922 CID000005184 CID000005487  
CID000005573 CID000005593 CID000007534 CID000009330  
CID000010680 CID000016576 CID000017361 CID000021847  
CID000024199 CID000042470 CID000045070 CID000065535  
CID005280567

(52) $S_{52}$ : 11 drug compounds can treat 'Antianorexic'

CID000002978 CID000003007 CID000003337 CID000004020  
CID000004771 CID000004786 CID000009982 CID000010007

CID000010661 CID000016630 CID000107786

(53) $S_{53}$ : 13 drug compounds can treat 'Antiatherosclerotic'

CID000003144 CID000060910 CID000065922 CID000122544  
CID000166558 CID000206044 CID000216325 CID003025811  
CID003081927 CID009851652 CID009939609 CID010216733  
CID049849451

(54) $S_{54}$ : 8 drug compounds can treat 'Antisecretory (gastric)'

CID000003231 CID000005387 CID000072171 CID000383414  
CID003081087 CID006916025 CID009948797 CID054574836

(55) $S_{55}$ : 14 drug compounds can treat 'Antiobesity'

CID000003337 CID000004599 CID000005210 CID000104850  
CID005023925 CID009849616 CID009861622 CID010052040  
CID010152529 CID010465263 CID019385000 CID022262705  
CID022506569 CID023400030

(56) $S_{56}$ : 7 drug compounds can treat 'Narcotic antagonist'

CID000003912 CID000004419 CID000004422 CID000004423  
CID000004424 CID004630917 CID020516612
