# Supplementary material for: Prediction of Drug Indications Based on Chemical Interactions and Chemical Similarities
Source: Biomed Res Int. 2015 Mar 2;2015:584546. doi: 10.1155/2015/584546 (PMC4363546; doi:10.1155/2015/584546)
Supplement: Supplementary file 1 — The Supplementary Material contains nine files. In detail, Supplementary Material I lists 1,733 drug compounds in the dataset DS1 and their indications; Supplementary Material II lists the number of drug samples in each category for dataset DS2; Supplementary Material III lists the detailed samples in each category for dataset DS2; Supplementary Material IV lists the performance of the method based on chemical similarities, where similarity scores were computed based on 8 types of fingerprints and k was set to 1, 2,…, 15, 1732; Supplementary Material V lists the prediction accuracies with different k obtained by the method based on chemical interactions on DS(i) evaluated by jackknife test; Supplementary Material VI lists the prediction accuracies obtained by three methods on DS(i), DS(s), DS2, evaluated by 5-fold cross-validation; Supplementary Material VII lists the prediction accuracy for each category by collecting the first two predictions obtained by the integrated method on DS2; Supplementary Material VIII lists the prediction accuracies obtained by methods based on chemical interactions, chemical similarities and integrated scores on DS(i) evaluated by jackknife test; Supplementary Material IX lists the prediction accuracies obtained by three methods on DS(i), DS(s), DS2, evaluated by jackknife test. [file 584546.f1.zip]

Archive with 9 entries (9 files):
- 584546.f1/Supp-I.pdf
- 584546.f1/Supp-II.pdf
- 584546.f1/Supp-III.pdf
- 584546.f1/Supp-IV.pdf
- 584546.f1/Supp-IX.pdf
- 584546.f1/Supp-V.pdf
- 584546.f1/Supp-VI.pdf
- 584546.f1/Supp-VII.pdf
- 584546.f1/Supp-VIII.pdf
